# Supplementary material for: Integration of transcriptome and proteome analyses reveal molecular mechanisms for formation of replant disease inNelumbo nucifera
Source: Royal Society of Chemistry journal article supplement (doi:10.1039/c8ra06503a), 2018-01-01
Supplement: c8ra06503a1.xlsx [file c8ra06503a1.xlsx]

## Sheet: Table S1
Table S1 Primer sequence of the 13 genes in Real-time PCR and isolation of POD gene in N.nucifera
Gene ID	Gene name	Forward primer (5’-3’)	Reverse primer (5’-3’)	Experiments
NNU_15912	ACO	AGAAAAGACAAAGCAAG	CAAAGTTAGCGGGGCTAT	Real-time PCR
NNU_04050	POD	GATACCCAGAGTTGTGAGC	AAAGCAATCGTGGAAGAA	Real-time PCR
NNU_06496	F3H	ACCGATGCCCTCACCAA	TGACGACGAAGGCTCCC	Real-time PCR
NNU_02876	PGI	ACCCGAATGACAGAAG	AGAGTGATGCGGTCTG	Real-time PCR
NNU_01774	DNMT1	TTGGACGCTATGCTATT	ATCCGAAACTGAGGTAGA	Real-time PCR
NNU_05129	PAL	ATCCATCCTACGCTCTACT	CTCCTCGCCTAATCTCG	Real-time PCR
NNU_06315	HCT	ATCGGGCTAAGTTGTTCG	TTGGCAGACTCGGTGTT	Real-time PCR
NNU_24837	CAD	GTCGAAATCTCCAGAACA	CCAGGAACAACAGGGTA	Real-time PCR
NNU_02538	PME	GGATTCCGAACCAAAGC	TCTCCGAGACGCCGTAC	Real-time PCR
NNU_07527	6PGD	GTTTCTGGGAGTGGATT	GAGGTGGTTCGGTTGTA	Real-time PCR
NNU_10554	CTPS	CCTCGCTAACGCTAATC	CTTCTTTATCTACTTATCCCTC	Real-time PCR
NNU_15671	SUS	CGAAACCCTGTCTGCTC	GAAATCGCTCCCAACTC	Real-time PCR
NNU_13097	ASN	TCATTGTTGCCCGAGAT	ATTCCACCTGCTTTGCT	Real-time PCR
	β-actin	TGATCGGAATGGAAGC	CAGCAATACCAGGGAAC	Real-time PCR (reference gene)
NNU_04050	POD	ATGGCCTCTACAACTACCA	TCAGTTGACCCTCCTGCAGT	Clone POD gene in N.nucifera

## Sheet: Table S2
Table S2 Information of DEGs between FP and CP
GeneID	log2FoldChange(CP/FP)	Up/Down-Regulation	P-value
NNU_21235	10.7513	Up	3.25614e-34
NNU_05705	10.224	Up	1.45578e-19
NNU_16875	10.1266	Up	1.09653e-29
NNU_24842	10.1052	Up	5.54518e-19
NNU_16224	10.0902	Up	4.46963e-61
NNU_23544	10.0474	Up	1.0274e-18
NNU_19759	9.90554	Up	2.37544e-35
NNU_01633	9.87138	Up	6.80329e-18
NNU_23369	9.86441	Up	3.35724e-78
NNU_09751	9.854	Up	6.88627e-38
NNU_06152	9.82165	Up	2.84507e-107
NNU_26463	9.76554	Up	2.03863e-85
NNU_22873	9.69738	Up	1.15538e-65
NNU_12066	9.69543	Up	4.20037e-17
NNU_25948	9.67792	Up	5.01953e-17
NNU_03596	9.66009	Up	3.30376e-36
NNU_12686	9.65433	Up	3.64944e-36
NNU_15519	9.6209	Up	1.5807e-64
NNU_09848	9.61685	Up	9.33164e-17
NNU_18455	9.54816	Up	7.98541e-26
NNU_25881	9.54364	Up	1.94291e-16
BGI_novel_G000738	9.51288	Up	2.57347e-109
NNU_01167	9.49134	Up	8.83977e-35
NNU_02696	9.47771	Up	1.13522e-34
NNU_20627	9.47105	Up	2.12982e-62
NNU_14003	9.46821	Up	1.04422e-181
NNU_07070	9.43229	Up	5.5485e-80
NNU_17683	9.42436	Up	6.28925e-16
NNU_24837	9.39386	Up	5.42446e-34
NNU_15282	9.31702	Up	1.76085e-15
NNU_07189	9.28441	Up	8.33628e-51
NNU_23752	9.28116	Up	1.6607e-125
NNU_06874	9.26746	Up	4.20522e-24
NNU_26637	9.24277	Up	9.18403e-33
NNU_10891	9.23775	Up	2.93034e-50
BGI_novel_G002176	9.22487	Up	4.34029e-15
NNU_23562	9.21035	Up	4.816e-15
NNU_02751	9.2049	Up	5.00096e-245
NNU_22605	9.1978	Up	1.31586e-22
NNU_19533	9.14887	Up	5.78564e-75
NNU_17082	9.12653	Up	2.66223e-168
NNU_04698	9.09869	Up	1.36155e-14
NNU_00404	9.05319	Up	8.1085e-23
NNU_07795	9.04497	Up	2.1999e-14
NNU_15776	9.03421	Up	1.75319e-39
NNU_10169	9.02471	Up	1.18526e-22
NNU_26297	8.98598	Up	1.37233e-55
NNU_21892	8.95992	Up	4.75552e-14
NNU_26054	8.9545	Up	9.55534e-39
NNU_06505	8.95362	Up	1.03276e-38
NNU_03963	8.90109	Up	0
NNU_22182	8.8443	Up	1.11877e-61
NNU_09755	8.84169	Up	1.24573e-29
NNU_25850	8.81537	Up	1.87067e-21
NNU_10311	8.79003	Up	9.6409e-132
NNU_18072	8.78703	Up	4.76682e-116
NNU_18468	8.76405	Up	5.06869e-29
NNU_14516	8.75458	Up	1.49534e-238
NNU_26674	8.74781	Up	4.5223e-21
NNU_02481	8.73543	Up	2.53893e-168
NNU_06206	8.6962	Up	4.66082e-13
NNU_22488	8.69342	Up	4.80049e-13
NNU_26618	8.68387	Up	5.26789e-13
NNU_11821	8.68375	Up	3.49476e-36
NNU_23566	8.67574	Up	3.1487e-59
NNU_14873	8.66693	Up	9.07653e-67
NNU_25928	8.66468	Up	5.46273e-36
NNU_21539	8.66068	Up	8.69527e-97
NNU_09831	8.64081	Up	9.13443e-36
NNU_04906	8.60473	Up	1.00955e-12
NNU_09628	8.60043	Up	4.38801e-58
NNU_05340	8.59058	Up	7.94118e-118
BGI_novel_G000931	8.58406	Up	1.25358e-12
NNU_06628	8.57753	Up	1.26133e-12
NNU_18301	8.51798	Up	3.19015e-27
NNU_17166	8.49378	Up	2.49484e-12
NNU_10142	8.48911	Up	2.60199e-12
NNU_22878	8.46553	Up	8.68565e-49
NNU_12944	8.44146	Up	1.07525e-26
BGI_novel_G001489	8.43557	Up	2.30563e-19
NNU_02132	8.42894	Up	3.4845e-77
NNU_22805	8.42579	Up	2.55755e-19
NNU_14478	8.40812	Up	1.17959e-33
NNU_09900	8.40568	Up	7.43381e-41
NNU_24409	8.40506	Up	0
NNU_00120	8.38818	Up	3.79453e-62
NNU_17624	8.36688	Up	6.87364e-12
NNU_07279	8.36636	Up	6.92397e-12
NNU_10299	8.36366	Up	4.01057e-258
NNU_02962	8.36159	Up	4.34846e-26
NNU_23547	8.35492	Up	7.8026e-12
NNU_24063	8.32607	Up	2.90212e-117
NNU_10775	8.32338	Up	6.73625e-33
NNU_23986	8.31251	Up	6.00846e-54
NNU_13671	8.306	Up	1.11024e-11
NNU_09647	8.30419	Up	2.3246e-158
NNU_10442	8.29775	Up	1.03247e-67
NNU_00838	8.29514	Up	1.08034e-46
NNU_24866	8.29133	Up	1.23584e-25
NNU_17398	8.28991	Up	1.26887e-11
NNU_01512	8.28951	Up	0
NNU_01457	8.28365	Up	1.33929e-11
NNU_22022	8.25384	Up	3.7016e-46
NNU_17327	8.22209	Up	1.1746e-52
NNU_10747	8.21483	Up	1.49305e-72
NNU_01951	8.21328	Up	2.28398e-11
BGI_novel_G001889	8.20791	Up	2.36369e-11
NNU_15187	8.20612	Up	7.21049e-32
NNU_20532	8.19627	Up	4.47412e-52
NNU_14084	8.19377	Up	3.38634e-113
NNU_08841	8.19193	Up	2.10873e-45
NNU_11231	8.1687	Up	5.44775e-18
NNU_07921	8.16867	Up	1.4373e-31
NNU_07391	8.15914	Up	4.89849e-45
NNU_17028	8.15715	Up	6.51658e-18
NNU_07234	8.15709	Up	6.96839e-219
NNU_23380	8.14601	Up	3.94708e-85
NNU_22367	8.13542	Up	3.2128e-171
NNU_02059	8.11244	Up	3.57353e-157
NNU_18380	8.1087	Up	1.04638e-110
NNU_16391	8.09835	Up	3.88522e-64
NNU_16634	8.08232	Up	1.42367e-50
NNU_11670	8.08009	Up	1.54179e-50
NNU_01021	8.07899	Up	5.00416e-44
NNU_06088	8.07381	Up	2.49849e-37
NNU_21541	8.05967	Up	3.05121e-37
NNU_22100	8.04483	Up	8.13786e-11
NNU_03745	8.03221	Up	1.43941e-236
NNU_06194	8.03162	Up	5.89198e-37
NNU_24744	8.01267	Up	4.54846e-82
NNU_22057	7.99141	Up	3.02159e-62
NNU_18994	7.9701	Up	2.64861e-36
NNU_13424	7.96274	Up	6.45514e-17
NNU_16344	7.94019	Up	8.13445e-68
NNU_04093	7.93702	Up	3.17598e-23
NNU_24660	7.92481	Up	4.16894e-23
NNU_12492	7.91352	Up	1.03115e-35
NNU_09883	7.90776	Up	4.96263e-42
NNU_00504	7.89981	Up	8.82079e-61
NNU_11085	7.8777	Up	1.17272e-97
NNU_16910	7.85599	Up	1.00394e-71
NNU_24705	7.84339	Up	1.28626e-22
NNU_07235	7.83694	Up	3.62806e-10
NNU_22388	7.81886	Up	8.88361e-35
NNU_26197	7.81745	Up	7.39298e-156
NNU_24295	7.79884	Up	9.68939e-41
NNU_05809	7.79462	Up	2.18013e-28
NNU_06205	7.79381	Up	4.91112e-10
NNU_09292	7.78216	Up	4.31179e-16
NNU_11571	7.77621	Up	2.44249e-46
NNU_06752	7.77391	Up	1.1142e-58
NNU_07268	7.7228	Up	0
NNU_03133	7.70001	Up	9.21755e-269
NNU_18772	7.69539	Up	3.49714e-138
NNU_14476	7.68794	Up	1.66615e-33
NNU_00614	7.68256	Up	7.26712e-116
NNU_08458	7.67091	Up	1.26053e-109
NNU_11582	7.6682	Up	1.16601e-09
BGI_novel_G000913	7.66499	Up	1.28901e-09
BGI_novel_G001335	7.653	Up	1.72144e-15
NNU_03702	7.62753	Up	3.0938e-21
NNU_08145	7.62516	Up	2.32053e-15
NNU_03574	7.62043	Up	3.59426e-21
NNU_19375	7.61482	Up	2.5759e-15
NNU_11652	7.61202	Up	1.3724e-38
NNU_09962	7.59268	Up	3.03848e-38
NNU_19479	7.58498	Up	0
NNU_23021	7.58136	Up	1.22595e-72
NNU_14722	7.57044	Up	2.20989e-32
NNU_03860	7.55606	Up	7.69477e-78
BGI_novel_G002177	7.55066	Up	3.26661e-09
NNU_13422	7.53433	Up	1.18428e-20
NNU_24404	7.53367	Up	1.8292e-71
BGI_novel_G000267	7.52806	Up	6.55361e-15
NNU_05622	7.52762	Up	6.67749e-15
NNU_03866	7.51724	Up	3.21202e-09
BGI_novel_G000894	7.50706	Up	3.88639e-09
NNU_11566	7.50111	Up	9.61804e-32
NNU_23502	7.50011	Up	7.18421e-120
NNU_08884	7.48277	Up	7.74932e-87
NNU_14576	7.47156	Up	3.07491e-20
NNU_20797	7.47074	Up	1.60872e-114
NNU_07165	7.46376	Up	3.77694e-20
NNU_11959	7.46109	Up	1.94066e-86
NNU_08559	7.43446	Up	4.16164e-31
NNU_25675	7.41312	Up	7.00672e-20
NNU_20109	7.3872	Up	4.11148e-36
NNU_07907	7.3803	Up	7.83175e-09
NNU_05911	7.37454	Up	3.0742e-14
NNU_00249	7.37204	Up	8.25005e-36
NNU_11739	7.35995	Up	5.33662e-25
NNU_05892	7.35581	Up	9.1946e-09
NNU_22271	7.33376	Up	1.93768e-19
NNU_12664	7.31979	Up	5.38284e-14
NNU_04627	7.31693	Up	5.5551e-14
NNU_20422	7.30381	Up	1.60684e-227
NNU_24513	7.30346	Up	2.81749e-114
NNU_22943	7.29639	Up	6.98822e-14
NNU_05905	7.29271	Up	7.48568e-14
NNU_25163	7.29209	Up	1.36837e-08
NNU_25346	7.28848	Up	7.5306e-119
NNU_24407	7.28157	Up	1.34936e-50
NNU_17792	7.28068	Up	7.90866e-14
NNU_21232	7.26872	Up	1.57725e-08
NNU_07231	7.26831	Up	0
NNU_12128	7.2681	Up	8.29505e-144
NNU_16948	7.26747	Up	2.59736e-50
NNU_00140	7.26726	Up	2.72867e-50
NNU_11557	7.26571	Up	0
NNU_01172	7.26075	Up	0
NNU_18192	7.25964	Up	0
NNU_20884	7.24991	Up	6.47509e-19
BGI_novel_G001833	7.24631	Up	1.20306e-13
NNU_24681	7.23619	Up	1.39439e-39
NNU_18226	7.23608	Up	0
NNU_25709	7.23309	Up	1.97408e-08
NNU_02879	7.22847	Up	3.87801e-101
NNU_04138	7.22123	Up	5.5843e-55
NNU_05177	7.21188	Up	5.09347e-29
NNU_00130	7.20766	Up	7.28064e-24
NNU_22049	7.20692	Up	2.11695e-44
NNU_03728	7.20115	Up	1.74252e-13
NNU_20259	7.20038	Up	0
NNU_10501	7.2002	Up	1.9016e-49
BGI_novel_G001622	7.18657	Up	2.89262e-08
NNU_06502	7.1858	Up	5.94504e-64
NNU_25946	7.18439	Up	2.57914e-54
NNU_16849	7.17177	Up	2.37019e-13
NNU_11930	7.17055	Up	5.99686e-59
NNU_09697	7.14534	Up	3.34827e-08
NNU_12647	7.13682	Up	3.5357e-08
NNU_07057	7.13289	Up	2.37071e-63
NNU_11559	7.1312	Up	1.18079e-265
NNU_10168	7.13116	Up	3.6527e-08
NNU_08731	7.13056	Up	3.68067e-08
BGI_novel_G001141	7.1262	Up	3.79817e-43
NNU_12071	7.12351	Up	3.84118e-08
NNU_22840	7.12133	Up	3.19846e-33
NNU_11162	7.12072	Up	1.28816e-137
NNU_02180	7.12041	Up	1.29459e-181
NNU_05160	7.11956	Up	3.95314e-08
NNU_26114	7.1159	Up	3.95847e-23
NNU_15298	7.11586	Up	4.02514e-08
NNU_26464	7.11515	Up	4.03622e-13
NNU_23215	7.11481	Up	4.06176e-08
BGI_novel_G001440	7.11365	Up	4.93468e-73
NNU_03267	7.11288	Up	3.95777e-18
NNU_17668	7.11126	Up	0
NNU_05423	7.10113	Up	6.55134e-43
BGI_novel_G002040	7.09936	Up	1.06916e-160
NNU_00790	7.08182	Up	1.16187e-263
NNU_04714	7.07667	Up	5.13641e-08
NNU_04720	7.05824	Up	1.05485e-22
NNU_25491	7.05654	Up	5.69053e-08
NNU_16856	7.05147	Up	2.01992e-76
NNU_23117	7.0418	Up	1.0272e-237
NNU_24442	7.03003	Up	2.87713e-32
NNU_14950	7.02982	Up	9.17165e-13
NNU_23631	7.0137	Up	3.03734e-56
NNU_13550	7.00422	Up	2.4966e-75
NNU_07998	6.97681	Up	9.3276e-08
BGI_novel_G000497	6.97603	Up	2.71552e-17
NNU_06584	6.97474	Up	6.32096e-46
NNU_13453	6.96825	Up	0
NNU_18314	6.96612	Up	5.82536e-46
NNU_26403	6.96523	Up	3.34648e-17
NNU_18889	6.96321	Up	2.85521e-17
NNU_15566	6.96131	Up	5.46988e-41
NNU_24384	6.95097	Up	1.05528e-07
NNU_02726	6.95003	Up	3.25359e-17
NNU_02857	6.9493	Up	7.15443e-41
NNU_12181	6.94837	Up	2.63511e-111
NNU_19504	6.94397	Up	1.59909e-26
NNU_08660	6.92852	Up	5.8804e-78
NNU_18418	6.92595	Up	1.21657e-07
NNU_10028	6.92457	Up	0
NNU_14513	6.91757	Up	1.27555e-07
NNU_06582	6.91617	Up	1.28951e-07
NNU_22221	6.91164	Up	5.30877e-17
NNU_06315	6.90781	Up	8.44844e-179
BGI_novel_G000914	6.9063	Up	6.75331e-17
NNU_00510	6.89566	Up	0
BGI_novel_G000954	6.89523	Up	1.47379e-07
NNU_13552	6.88943	Up	3.98238e-40
NNU_24436	6.87444	Up	3.88204e-12
NNU_11590	6.87198	Up	1.83001e-44
NNU_08867	6.87077	Up	3.16905e-81
NNU_02165	6.8697	Up	9.527e-17
NNU_02150	6.86042	Up	1.07394e-16
BGI_novel_G000006	6.84981	Up	5.28693e-12
NNU_14857	6.84574	Up	1.92624e-07
NNU_08947	6.83479	Up	6.31352e-12
NNU_01321	6.83043	Up	7.83858e-35
NNU_18980	6.82867	Up	2.89672e-57
NNU_02933	6.80543	Up	7.24498e-12
NNU_13642	6.79046	Up	8.28369e-12
NNU_18928	6.78891	Up	7.64282e-21
NNU_11542	6.7849	Up	7.42411e-74
NNU_09530	6.78352	Up	3.47455e-43
NNU_02519	6.77819	Up	2.8068e-07
NNU_14321	6.77243	Up	0
NNU_11127	6.77112	Up	3.26977e-16
NNU_02333	6.76317	Up	3.83906e-109
NNU_05361	6.73868	Up	2.33902e-29
NNU_03855	6.73815	Up	3.53381e-07
NNU_17788	6.73448	Up	5.10205e-16
NNU_11593	6.73117	Up	7.978e-47
NNU_02436	6.7281	Up	8.55743e-47
NNU_24352	6.72587	Up	1.49436e-11
NNU_26477	6.72369	Up	3.82692e-07
NNU_11969	6.71895	Up	2.34268e-20
NNU_13228	6.71741	Up	3.92164e-07
NNU_11299	6.71339	Up	4.06779e-07
NNU_15078	6.70683	Up	2.729e-59
NNU_16406	6.70084	Up	0
NNU_07164	6.7	Up	4.30263e-07
NNU_05095	6.69887	Up	3.10383e-33
NNU_00170	6.69267	Up	5.58226e-85
NNU_09133	6.68897	Up	4.55355e-07
BGI_novel_G000554	6.68497	Up	2.00135e-24
NNU_22005	6.67791	Up	3.63445e-164
NNU_22832	6.66367	Up	1.94809e-41
NNU_25739	6.66259	Up	2.00389e-41
NNU_05066	6.6607	Up	4.8232e-177
NNU_18842	6.65565	Up	6.55349e-122
NNU_15517	6.65354	Up	3.01784e-11
NNU_25308	6.65343	Up	1.76302e-45
NNU_10854	6.64608	Up	6.14149e-54
NNU_02202	6.6351	Up	3.3294e-11
NNU_24987	6.62038	Up	1.11118e-19
NNU_17740	6.6161	Up	1.4059e-36
NNU_12337	6.61506	Up	6.77642e-07
NNU_06624	6.61452	Up	3.00137e-198
NNU_20295	6.61299	Up	6.59669e-45
NNU_17571	6.61013	Up	0
NNU_01424	6.60665	Up	1.28842e-40
NNU_12875	6.60505	Up	1.79688e-19
NNU_26108	6.60367	Up	1.2766e-40
NNU_23589	6.59545	Up	1.65241e-19
NNU_15575	6.58911	Up	6.19139e-32
BGI_novel_G000806	6.58097	Up	8.13185e-07
NNU_23232	6.57042	Up	8.56304e-07
NNU_01146	6.56881	Up	8.64733e-07
NNU_05418	6.56878	Up	8.65205e-106
BGI_novel_G001175	6.56559	Up	3.87927e-15
NNU_10977	6.55862	Up	9.09204e-07
NNU_16771	6.55656	Up	2.99016e-23
NNU_18227	6.55006	Up	6.98329e-11
NNU_15179	6.5393	Up	5.60211e-117
NNU_18101	6.53714	Up	1.45214e-35
BGI_novel_G002056	6.53583	Up	1.02454e-06
NNU_11982	6.53373	Up	1.03727e-06
NNU_11705	6.52242	Up	1.10596e-06
NNU_03998	6.51784	Up	7.21376e-15
BGI_novel_G000659	6.51166	Up	2.05595e-99
NNU_21154	6.50961	Up	6.50023e-233
NNU_25672	6.50948	Up	1.36799e-06
NNU_14780	6.50218	Up	4.29527e-87
NNU_15904	6.50007	Up	0
BGI_novel_G001605	6.49987	Up	1.26693e-06
BGI_novel_G001526	6.49821	Up	1.07787e-10
NNU_05874	6.49515	Up	2.0956e-174
NNU_00584	6.49492	Up	1.80473e-240
NNU_02639	6.49488	Up	1.28982e-06
NNU_17605	6.49311	Up	4.52897e-59
NNU_15493	6.49233	Up	1.30101e-06
NNU_26239	6.48921	Up	6.77908e-35
NNU_04900	6.47845	Up	1.40995e-181
NNU_00463	6.46407	Up	1.52415e-06
NNU_02846	6.45975	Up	0
NNU_14094	6.4533	Up	1.02124e-186
NNU_03413	6.4499	Up	1.59803e-06
NNU_21234	6.4479	Up	1.87718e-271
BGI_novel_G001047	6.44147	Up	1.76159e-10
NNU_18065	6.43674	Up	1.70696e-06
NNU_22456	6.43357	Up	0
NNU_20665	6.42696	Up	3.17944e-69
NNU_05549	6.42586	Up	9.87157e-100
NNU_23536	6.42366	Up	0
NNU_13876	6.42128	Up	0
NNU_04722	6.41548	Up	3.76138e-18
NNU_04439	6.41114	Up	1.14403e-49
NNU_02520	6.40964	Up	0
NNU_03165	6.40964	Up	6.40401e-38
NNU_05298	6.40908	Up	1.6295e-53
BGI_novel_G000001	6.40809	Up	3.05361e-18
NNU_16211	6.40414	Up	2.4447e-87
BGI_novel_G002094	6.40407	Up	3.23052e-264
NNU_20088	6.38621	Up	7.98832e-111
NNU_11437	6.38439	Up	1.34819e-60
NNU_07068	6.38379	Up	2.62454e-114
BGI_novel_G000491	6.38096	Up	3.36063e-10
NNU_04433	6.37152	Up	3.17324e-10
NNU_15926	6.37092	Up	6.51488e-22
NNU_14199	6.36975	Up	2.38964e-06
NNU_20734	6.36633	Up	0
NNU_05578	6.35868	Up	2.52427e-06
NNU_07085	6.35446	Up	0
NNU_05937	6.3516	Up	1.05729e-21
NNU_09483	6.35151	Up	2.6606e-06
NNU_08021	6.34544	Up	5.18308e-14
NNU_23953	6.34475	Up	2.69938e-06
NNU_11355	6.33297	Up	1.27356e-21
NNU_03166	6.33153	Up	8.20143e-37
BGI_novel_G000883	6.33096	Up	2.05635e-25
NNU_12814	6.33057	Up	2.90271e-06
NNU_25896	6.32758	Up	9.69377e-104
NNU_08496	6.32407	Up	4.60853e-10
NNU_01046	6.3184	Up	1.35382e-159
NNU_02495	6.31805	Up	3.07545e-06
NNU_17832	6.30246	Up	3.33715e-06
NNU_19565	6.28516	Up	2.41555e-62
NNU_20624	6.28485	Up	1.19463e-97
NNU_23637	6.27324	Up	6.70172e-58
NNU_15183	6.27278	Up	6.20618e-173
NNU_22772	6.27203	Up	3.86598e-06
NNU_00565	6.26313	Up	4.73027e-104
NNU_07214	6.26076	Up	3.17689e-191
NNU_20209	6.25958	Up	4.10098e-06
NNU_05764	6.25926	Up	0
NNU_05400	6.25873	Up	8.00064e-47
NNU_13289	6.25625	Up	1.50052e-13
NNU_04676	6.25076	Up	2.3209e-272
NNU_06456	6.24935	Up	2.41196e-28
NNU_20444	6.24777	Up	0
NNU_04864	6.24518	Up	4.39046e-06
NNU_22122	6.24446	Up	8.91471e-217
NNU_16462	6.24284	Up	3.65667e-17
NNU_06773	6.23862	Up	5.83124e-39
NNU_10893	6.23672	Up	1.88532e-13
NNU_05275	6.23437	Up	6.21916e-276
NNU_18321	6.22902	Up	6.3378e-273
NNU_11167	6.22311	Up	1.11574e-20
NNU_05762	6.21631	Up	5.0143e-17
NNU_02903	6.20965	Up	7.72447e-93
NNU_20923	6.20762	Up	6.64989e-110
NNU_21986	6.20756	Up	6.1724e-35
NNU_06787	6.20751	Up	3.83815e-35
NNU_12289	6.2061	Up	5.36681e-06
NNU_16869	6.20201	Up	3.27569e-31
NNU_08010	6.19962	Up	1.89153e-27
NNU_12735	6.19868	Up	5.72156e-06
NNU_25264	6.19687	Up	8.25214e-244
NNU_20448	6.19369	Up	1.37498e-62
NNU_24844	6.19276	Up	1.58943e-20
NNU_19789	6.19146	Up	1.90746e-141
NNU_09173	6.19117	Up	9.13521e-28
NNU_00441	6.18313	Up	7.73517e-35
NNU_22551	6.17934	Up	6.06591e-06
NNU_19096	6.17513	Up	2.44038e-20
NNU_00702	6.17468	Up	1.72095e-09
NNU_06211	6.17349	Up	1.55088e-164
NNU_09254	6.17286	Up	6.88866e-06
NNU_17623	6.16853	Up	6.3326e-06
NNU_21390	6.16715	Up	6.392e-06
NNU_05544	6.15598	Up	4.85342e-45
NNU_10535	6.15027	Up	3.2906e-20
NNU_14672	6.14742	Up	7.07818e-06
NNU_23469	6.1421	Up	5.37325e-13
NNU_18100	6.14205	Up	6.28279e-13
NNU_06945	6.13803	Up	6.49766e-59
NNU_01052	6.13659	Up	1.46673e-16
NNU_20944	6.13444	Up	2.2751e-51
NNU_02424	6.13071	Up	1.83956e-16
NNU_05909	6.13036	Up	7.46735e-110
NNU_23168	6.12926	Up	1.44094e-251
NNU_08376	6.12911	Up	6.25751e-69
NNU_05097	6.12323	Up	8.01024e-06
NNU_01319	6.11677	Up	2.66883e-23
NNU_08825	6.1094	Up	7.63528e-13
NNU_08209	6.10841	Up	8.18535e-154
NNU_06435	6.10448	Up	2.36662e-16
NNU_03052	6.10354	Up	2.49205e-16
NNU_21367	6.10315	Up	8.5916e-06
NNU_18413	6.10178	Up	4.9478e-58
NNU_24760	6.09444	Up	2.80459e-23
NNU_14187	6.09387	Up	6.52474e-58
BGI_novel_G001753	6.09327	Up	1.35637e-14
NNU_21784	6.08883	Up	4.29146e-23
NNU_12363	6.08726	Up	9.21639e-06
NNU_13819	6.08399	Up	4.48993e-40
NNU_07264	6.07985	Up	3.42234e-40
NNU_20204	6.07266	Up	4.59476e-16
NNU_22177	6.06815	Up	1.0162e-05
NNU_09386	6.06555	Up	2.91127e-84
NNU_22442	6.06368	Up	4.29121e-16
NNU_05420	6.06126	Up	2.40507e-26
BGI_novel_G001774	6.06108	Up	4.06367e-09
NNU_10482	6.05872	Up	3.3365e-100
NNU_05559	6.05845	Up	0
NNU_16635	6.05438	Up	3.63873e-161
NNU_15131	6.04142	Up	3.16354e-275
NNU_04724	6.03558	Up	1.17046e-05
NNU_04623	6.03435	Up	4.61121e-09
NNU_10271	6.0336	Up	1.1814e-05
NNU_11701	6.01071	Up	9.99337e-102
NNU_01957	5.99696	Up	1.84758e-65
NNU_01973	5.99444	Up	2.55908e-12
NNU_05765	5.99411	Up	2.66105e-12
NNU_21596	5.99391	Up	2.76228e-12
NNU_25718	5.98999	Up	2.86333e-91
NNU_02869	5.9865	Up	2.16627e-65
NNU_12423	5.97918	Up	5.73636e-52
NNU_21872	5.97818	Up	3.19316e-22
NNU_03128	5.97513	Up	0
BGI_novel_G000532	5.9683	Up	1.4205e-38
BGI_novel_G000297	5.96367	Up	1.61265e-05
NNU_16123	5.96133	Up	9.17982e-09
NNU_23363	5.95448	Up	2.03225e-05
NNU_09724	5.95268	Up	1.74176e-05
NNU_07717	5.95199	Up	2.90054e-60
NNU_10489	5.95165	Up	4.40824e-12
NNU_01959	5.94273	Up	1.98e-108
NNU_25088	5.93909	Up	4.85492e-12
NNU_14810	5.92954	Up	6.03905e-12
NNU_04596	5.929	Up	2.99991e-15
NNU_06281	5.92789	Up	8.06307e-22
NNU_03366	5.92307	Up	1.94997e-05
NNU_14496	5.92151	Up	1.28192e-79
NNU_13025	5.92133	Up	1.45561e-60
NNU_08789	5.91828	Up	1.11561e-08
NNU_24604	5.91806	Up	1.05719e-21
NNU_12339	5.9178	Up	5.80841e-57
NNU_10795	5.91244	Up	0
NNU_12546	5.90922	Up	2.39454e-18
NNU_17732	5.90842	Up	8.83727e-28
NNU_22624	5.90484	Up	6.68623e-12
NNU_02191	5.90347	Up	6.00986e-139
NNU_04726	5.90268	Up	1.3269e-08
NNU_11694	5.90011	Up	1.11138e-62
NNU_11681	5.89955	Up	1.26273e-08
NNU_08967	5.89913	Up	2.16633e-05
NNU_13906	5.89333	Up	1.27002e-94
NNU_21545	5.88998	Up	2.88605e-59
NNU_00885	5.88475	Up	1.53418e-08
NNU_15169	5.88389	Up	1.51053e-08
NNU_09213	5.8803	Up	2.36882e-05
NNU_04164	5.86487	Up	8.09856e-99
NNU_13165	5.86431	Up	1.11237e-11
NNU_22143	5.86061	Up	1.05796e-11
NNU_14951	5.84711	Up	2.68634e-05
NNU_14749	5.83919	Up	7.38356e-18
NNU_00559	5.8379	Up	4.68253e-27
NNU_07293	5.83268	Up	4.2124e-284
NNU_17416	5.8326	Up	3.85302e-24
NNU_10964	5.8313	Up	2.44493e-48
NNU_18319	5.82384	Up	7.17413e-21
NNU_15939	5.81388	Up	1.72293e-11
NNU_02244	5.81327	Up	2.66569e-08
NNU_04126	5.80676	Up	1.32805e-210
NNU_19605	5.8049	Up	2.71725e-08
NNU_06318	5.80409	Up	9.97024e-24
NNU_24629	5.80177	Up	3.28559e-05
BGI_novel_G001423	5.79945	Up	2.40736e-11
NNU_18846	5.79528	Up	0
BGI_novel_G000915	5.79116	Up	3.68376e-05
NNU_10540	5.78788	Up	2.39129e-11
NNU_24356	5.78236	Up	3.16313e-14
NNU_15154	5.78206	Up	3.55203e-05
NNU_09687	5.77427	Up	2.61899e-11
NNU_23886	5.76949	Up	3.3052e-08
NNU_11548	5.7681	Up	2.78712e-14
NNU_15069	5.7654	Up	2.19165e-17
NNU_14285	5.76349	Up	3.10516e-98
NNU_23311	5.75333	Up	4.0802e-05
NNU_22742	5.74025	Up	3.52122e-14
NNU_26233	5.737	Up	6.16136e-26
NNU_25761	5.73528	Up	1.25376e-58
NNU_07310	5.73291	Up	4.37782e-26
NNU_11698	5.7264	Up	0
NNU_16282	5.72496	Up	4.69105e-08
NNU_05445	5.72255	Up	5.64331e-23
NNU_20298	5.71952	Up	2.13945e-148
NNU_22765	5.71568	Up	1.06447e-22
BGI_novel_G000191	5.71353	Up	3.84913e-157
NNU_08001	5.71095	Up	4.85748e-05
NNU_17063	5.7105	Up	4.22414e-93
NNU_03422	5.701	Up	1.01855e-127
NNU_03676	5.69392	Up	5.14305e-05
NNU_01911	5.6923	Up	6.48678e-14
NNU_13797	5.68969	Up	5.27397e-05
NNU_11093	5.68923	Up	2.69075e-238
NNU_07081	5.68693	Up	7.08552e-14
NNU_22356	5.67071	Up	7.17052e-254
NNU_17215	5.6707	Up	5.44941e-187
NNU_20127	5.66965	Up	6.99037e-203
NNU_07294	5.66962	Up	5.67466e-05
NNU_26624	5.66572	Up	5.83627e-05
NNU_00314	5.66278	Up	2.72512e-39
NNU_11448	5.65299	Up	6.20922e-05
NNU_08487	5.65032	Up	7.9081e-08
NNU_15257	5.64825	Up	1.24626e-13
NNU_04065	5.64624	Up	6.25084e-05
NNU_23814	5.64622	Up	1.37649e-10
NNU_05193	5.64081	Up	6.43633e-05
BGI_novel_G000725	5.63703	Up	1.08513e-10
NNU_07186	5.62967	Up	1.16652e-10
NNU_20924	5.62734	Up	1.24707e-50
NNU_13524	5.62416	Up	2.46876e-53
NNU_25652	5.62357	Up	1.27589e-111
NNU_12744	5.62248	Up	6.85385e-05
NNU_08384	5.62105	Up	9.00569e-112
NNU_17247	5.61578	Up	1.33218e-10
NNU_00649	5.60652	Up	1.45387e-44
NNU_23840	5.60374	Up	6.87065e-160
NNU_07244	5.59811	Up	1.1332e-35
NNU_04211	5.58989	Up	1.8852e-35
NNU_13854	5.58985	Up	7.92666e-05
NNU_20027	5.58944	Up	1.73786e-41
NNU_05515	5.58674	Up	4.24219e-16
NNU_09171	5.58441	Up	1.57467e-21
NNU_13814	5.58402	Up	3.45654e-99
BGI_novel_G000783	5.57759	Up	1.02105e-92
NNU_04002	5.57467	Up	1.93736e-46
NNU_22767	5.57378	Up	8.33506e-05
NNU_05074	5.56611	Up	1.06381e-261
NNU_13075	5.55656	Up	1.45823e-07
NNU_15990	5.552	Up	2.50504e-261
NNU_01732	5.55105	Up	4.35383e-13
NNU_12871	5.55067	Up	2.52418e-10
NNU_03373	5.5297	Up	8.73563e-21
NNU_00310	5.52829	Up	2.96943e-10
NNU_09190	5.52291	Up	2.19208e-26
NNU_04719	5.52078	Up	0.000102795
NNU_04036	5.51814	Up	1.13165e-58
NNU_04587	5.51483	Up	1.38455e-65
NNU_01056	5.51283	Up	2.67518e-111
NNU_09966	5.51154	Up	0.00010771
NNU_20438	5.51103	Up	0.000108333
NNU_07020	5.50961	Up	2.50643e-37
NNU_18074	5.50812	Up	7.33176e-45
NNU_16718	5.49937	Up	2.48592e-07
NNU_20048	5.49687	Up	3.16703e-162
NNU_09413	5.49494	Up	0.000113606
NNU_11578	5.49449	Up	0.000113929
BGI_novel_G000938	5.49237	Up	2.95153e-50
NNU_22176	5.48763	Up	1.45272e-52
BGI_novel_G000440	5.48749	Up	1.50792e-76
NNU_15890	5.48728	Up	4.97081e-18
NNU_19560	5.48103	Up	8.93725e-79
NNU_23509	5.4808	Up	3.93208e-18
BGI_novel_G000084	5.47697	Up	3.05093e-47
NNU_04715	5.46769	Up	0.000126048
NNU_04532	5.46755	Up	0.000126287
NNU_12227	5.46589	Up	0
NNU_10087	5.45486	Up	4.50215e-132
NNU_05213	5.4536	Up	4.23808e-80
NNU_11263	5.453	Up	0.000137168
NNU_17090	5.45247	Up	0
NNU_26684	5.44526	Up	3.8832e-51
NNU_00023	5.44512	Up	2.86235e-36
NNU_15911	5.43814	Up	3.25252e-28
NNU_11841	5.43488	Up	7.63824e-10
NNU_07423	5.42541	Up	1.1259e-17
NNU_07840	5.41465	Up	3.85092e-07
NNU_24849	5.41447	Up	1.9814e-25
NNU_22597	5.41415	Up	0
NNU_02964	5.4071	Up	9.34738e-28
NNU_26321	5.40468	Up	0
NNU_11728	5.40382	Up	0.000161863
NNU_11447	5.40365	Up	0.000163343
NNU_02439	5.40067	Up	1.06409e-09
NNU_12226	5.39447	Up	0.000170599
NNU_23597	5.39248	Up	0
NNU_01476	5.38743	Up	4.51351e-07
NNU_09590	5.38003	Up	0.000175977
NNU_03081	5.37663	Up	2.72416e-17
NNU_03275	5.37564	Up	8.21493e-226
NNU_07236	5.37187	Up	0
NNU_08818	5.36904	Up	0.000187217
NNU_18469	5.36751	Up	1.13723e-14
BGI_novel_G000307	5.36697	Up	0.000212866
NNU_09130	5.36655	Up	0
NNU_25434	5.36534	Up	9.79527e-81
NNU_00930	5.36326	Up	4.70763e-17
NNU_12695	5.36183	Up	0.000192303
NNU_19765	5.36146	Up	3.99114e-104
NNU_25091	5.35803	Up	4.16575e-17
BGI_novel_G000821	5.3557	Up	1.31395e-14
NNU_17767	5.34992	Up	0.000197628
NNU_12218	5.34788	Up	5.70149e-234
NNU_14002	5.3462	Up	4.44527e-125
NNU_21500	5.34313	Up	4.90808e-32
NNU_06004	5.34196	Up	1.42843e-73
NNU_09818	5.33452	Up	4.81951e-68
NNU_01188	5.33379	Up	0
BGI_novel_G001566	5.32305	Up	3.36524e-128
NNU_17687	5.32051	Up	8.23792e-110
NNU_00900	5.31844	Up	0.000222236
NNU_23103	5.31832	Up	4.41177e-24
NNU_17363	5.31648	Up	7.55101e-12
NNU_09016	5.31631	Up	7.29568e-07
BGI_novel_G001330	5.31576	Up	7.2246e-07
NNU_17307	5.31561	Up	2.70535e-46
NNU_12870	5.31354	Up	1.39027e-92
BGI_novel_G000636	5.30088	Up	8.1093e-07
NNU_14005	5.3006	Up	4.41593e-43
NNU_26630	5.29714	Up	9.25173e-12
NNU_02878	5.2931	Up	1.07888e-11
NNU_01867	5.29227	Up	0
NNU_16905	5.29157	Up	1.76799e-35
NNU_02136	5.29092	Up	3.29153e-09
NNU_03130	5.29088	Up	7.02857e-113
NNU_03345	5.28782	Up	0.000248132
NNU_13354	5.28471	Up	3.87585e-14
NNU_12035	5.28463	Up	4.84113e-14
NNU_18661	5.2818	Up	3.10876e-26
NNU_09675	5.28172	Up	9.64349e-07
BGI_novel_G001766	5.27662	Up	0.000262557
NNU_10815	5.27627	Up	5.8517e-36
NNU_05458	5.27474	Up	1.47915e-47
NNU_19242	5.27411	Up	1.34537e-40
NNU_02124	5.27244	Up	4.31666e-52
NNU_07838	5.26869	Up	0
NNU_17188	5.26642	Up	7.01202e-19
NNU_14089	5.26323	Up	4.44531e-26
NNU_04614	5.2615	Up	0
NNU_23623	5.25605	Up	7.16215e-108
NNU_06013	5.25493	Up	5.21752e-26
NNU_12170	5.25486	Up	1.07338e-06
NNU_20395	5.25432	Up	0.00028068
NNU_25483	5.25285	Up	1.38019e-113
NNU_12926	5.24784	Up	1.16116e-32
BGI_novel_G001864	5.2438	Up	9.76462e-14
NNU_05191	5.24341	Up	4.5886e-21
NNU_22925	5.2432	Up	2.56956e-16
NNU_25189	5.24007	Up	1.18104e-06
NNU_13741	5.23923	Up	9.52094e-38
NNU_03910	5.23395	Up	0
NNU_12915	5.23369	Up	1.23796e-18
NNU_07183	5.23242	Up	2.12706e-121
NNU_17778	5.22697	Up	9.4058e-54
NNU_17536	5.22582	Up	1.11666e-48
NNU_06607	5.22546	Up	4.70172e-16
NNU_21213	5.22511	Up	1.32357e-06
NNU_05172	5.22085	Up	0.000316427
NNU_11734	5.21916	Up	7.70522e-21
NNU_11306	5.21674	Up	0
NNU_09165	5.21452	Up	1.78246e-87
NNU_09610	5.20892	Up	5.74788e-09
NNU_25012	5.20737	Up	2.56387e-11
NNU_13246	5.20566	Up	6.38191e-09
NNU_16228	5.20065	Up	2.95336e-133
NNU_13778	5.1989	Up	0
NNU_25435	5.19573	Up	4.24176e-41
NNU_26185	5.19497	Up	1.57527e-06
NNU_09487	5.1896	Up	0.000351356
NNU_08682	5.18546	Up	8.30965e-16
NNU_16940	5.18439	Up	0.00036009
NNU_00903	5.18266	Up	0.000362111
NNU_26022	5.17961	Up	9.06948e-101
NNU_01903	5.17835	Up	0.000370384
NNU_14720	5.17755	Up	1.19901e-101
NNU_10991	5.17654	Up	0
BGI_novel_G000953	5.1705	Up	1.89459e-06
NNU_12078	5.1645	Up	1.55235e-187
NNU_16726	5.16113	Up	1.91633e-06
NNU_12075	5.15687	Up	1.71737e-22
NNU_18831	5.15356	Up	0
NNU_11642	5.15164	Up	2.08274e-31
BGI_novel_G001821	5.15096	Up	0.000404829
NNU_10342	5.1447	Up	8.46957e-98
BGI_novel_G000352	5.14334	Up	1.37032e-62
NNU_06079	5.14186	Up	2.02957e-40
NNU_05105	5.13545	Up	0
NNU_06154	5.12598	Up	2.14557e-59
NNU_04435	5.12462	Up	7.02462e-209
NNU_21141	5.12374	Up	4.39885e-13
NNU_11568	5.12303	Up	5.79801e-62
NNU_09259	5.11934	Up	6.7967e-20
NNU_09930	5.11664	Up	0.000454294
NNU_20430	5.11399	Up	0.000460954
NNU_04972	5.11195	Up	0.000462505
BGI_novel_G001160	5.11005	Up	2.34063e-78
NNU_09364	5.10463	Up	1.53073e-17
NNU_09699	5.10156	Up	1.7867e-17
NNU_22639	5.09533	Up	2.85009e-06
NNU_06482	5.09339	Up	5.60221e-78
NNU_14233	5.0921	Up	2.92447e-06
NNU_25493	5.09054	Up	1.33876e-19
NNU_12152	5.08664	Up	1.82158e-08
NNU_06040	5.0835	Up	3.64849e-26
NNU_20588	5.0771	Up	0.000522293
NNU_20223	5.07594	Up	0.000522654
BGI_novel_G000402	5.06802	Up	7.8387e-28
NNU_18886	5.06639	Up	1.49918e-42
NNU_25537	5.06254	Up	0
NNU_23176	5.05891	Up	2.47674e-49
NNU_02350	5.0534	Up	2.27282e-261
NNU_18636	5.05264	Up	1.01862e-125
NNU_03604	5.04777	Up	1.17156e-25
NNU_15809	5.04729	Up	2.49564e-279
NNU_13477	5.04642	Up	1.61245e-10
NNU_25318	5.0446	Up	3.48904e-153
NNU_04713	5.04287	Up	0.00058268
NNU_25875	5.04136	Up	1.41098e-25
NNU_22284	5.0318	Up	4.56206e-23
NNU_21917	5.03147	Up	3.52341e-33
NNU_07549	5.03064	Up	1.51615e-12
NNU_21740	5.02863	Up	0.000621456
NNU_09629	5.02792	Up	5.10473e-93
NNU_05113	5.01714	Up	2.5048e-25
NNU_20096	5.0145	Up	2.59494e-132
NNU_12979	5.01152	Up	2.59489e-10
NNU_23946	5.00999	Up	0
NNU_13880	5.00945	Up	6.62967e-54
NNU_04918	5.00279	Up	0.000665636
NNU_06717	5.00178	Up	0.000668869
NNU_03079	5.00128	Up	2.92454e-10
NNU_00824	4.99961	Up	1.60632e-103
NNU_22408	4.99889	Up	0.000678088
NNU_12229	4.99614	Up	3.78041e-08
NNU_15571	4.99127	Up	1.35278e-233
NNU_02143	4.99065	Up	0
NNU_21918	4.98986	Up	1.29943e-18
NNU_19087	4.98647	Up	2.67396e-231
NNU_13918	4.98505	Up	5.52241e-33
NNU_05461	4.98443	Up	2.77183e-12
NNU_06674	4.98288	Up	2.29452e-39
NNU_18240	4.98226	Up	8.23669e-29
BGI_novel_G000772	4.98188	Up	5.84772e-06
NNU_09832	4.98094	Up	1.18493e-18
NNU_25587	4.98043	Up	5.50098e-31
NNU_04229	4.97592	Up	2.9305e-216
NNU_08377	4.97577	Up	1.04806e-98
NNU_11429	4.97018	Up	1.76491e-22
NNU_05251	4.96472	Up	6.40641e-06
NNU_07661	4.96369	Up	5.4706e-16
NNU_09355	4.96092	Up	3.70819e-12
NNU_26536	4.96017	Up	3.06739e-32
NNU_05835	4.9545	Up	0.000785853
NNU_01095	4.94997	Up	1.55303e-149
NNU_17923	4.94988	Up	0.000802754
NNU_01985	4.94862	Up	1.75171e-48
NNU_03743	4.94542	Up	1.13715e-32
NNU_05897	4.9385	Up	2.27162e-145
NNU_13421	4.93803	Up	0.000876384
NNU_18047	4.93725	Up	1.48121e-104
NNU_01284	4.93441	Up	2.47178e-176
NNU_00292	4.93047	Up	6.58723e-40
NNU_06570	4.92649	Up	6.27347e-12
NNU_22093	4.9262	Up	4.89607e-90
NNU_21980	4.91149	Up	6.53141e-22
NNU_24201	4.90928	Up	2.11525e-111
NNU_01748	4.89407	Up	2.398e-47
BGI_novel_G000041	4.89299	Up	1.91421e-158
BGI_novel_G000021	4.87618	Up	1.66634e-13
NNU_26237	4.87484	Up	0.00100896
NNU_12962	4.87232	Up	0.00102277
NNU_24753	4.87177	Up	3.99968e-91
NNU_20138	4.86977	Up	2.80475e-17
BGI_novel_G001131	4.86865	Up	1.16575e-07
NNU_15661	4.86751	Up	1.35595e-09
BGI_novel_G001389	4.86702	Up	1.15146e-11
NNU_14821	4.865	Up	2.78968e-52
NNU_03269	4.86333	Up	6.29765e-29
NNU_02293	4.86154	Up	8.79738e-43
NNU_08586	4.85781	Up	0
NNU_00660	4.85564	Up	0.00109326
NNU_08352	4.85542	Up	1.23154e-07
NNU_16861	4.84663	Up	4.11078e-65
NNU_26669	4.83943	Up	1.88877e-110
NNU_02425	4.8386	Up	4.14366e-23
NNU_21480	4.83547	Up	6.29993e-27
NNU_09963	4.83028	Up	0
NNU_01283	4.82885	Up	1.05152e-97
NNU_00927	4.82878	Up	0.00117067
NNU_07977	4.82693	Up	1.41149e-05
NNU_18141	4.82686	Up	2.18925e-11
NNU_19118	4.82275	Up	3.29055e-45
NNU_09017	4.82086	Up	0.00120352
NNU_13056	4.82027	Up	0.00121164
NNU_26654	4.81857	Up	0.00121498
NNU_13612	4.81413	Up	0.00123535
NNU_25796	4.81362	Up	1.49052e-157
NNU_17239	4.8134	Up	9.71754e-68
NNU_10355	4.81336	Up	2.09043e-54
NNU_00512	4.80873	Up	0
NNU_04738	4.80732	Up	9.63892e-17
NNU_01104	4.80535	Up	0.0012786
NNU_26337	4.80535	Up	2.45185e-18
NNU_06188	4.80271	Up	0.00129774
NNU_25684	4.80263	Up	1.64256e-05
NNU_18009	4.80174	Up	1.20105e-74
NNU_17339	4.79503	Up	3.24965e-126
NNU_20146	4.79154	Up	1.94425e-07
NNU_05583	4.78975	Up	2.79134e-09
NNU_16560	4.78893	Up	1.51925e-22
BGI_novel_G002102	4.78805	Up	2.52873e-231
NNU_09849	4.78767	Up	7.08176e-153
NNU_14650	4.7837	Up	0.00134173
NNU_25509	4.78148	Up	2.225e-29
NNU_02622	4.78083	Up	0.00135594
NNU_09467	4.77961	Up	5.32889e-114
NNU_08365	4.77894	Up	3.81854e-11
BGI_novel_G001488	4.77848	Up	0.0013734
NNU_19496	4.77378	Up	0.00139223
NNU_26031	4.76783	Up	9.49182e-72
NNU_24732	4.76687	Up	2.88325e-43
NNU_05795	4.76607	Up	0.00143943
NNU_23624	4.766	Up	1.89984e-05
NNU_19216	4.76186	Up	0.00145698
NNU_20899	4.75689	Up	8.98784e-15
NNU_11284	4.75319	Up	1.26007e-16
NNU_06082	4.75248	Up	1.35989e-25
NNU_22277	4.75111	Up	1.23274e-46
NNU_09136	4.74957	Up	2.71477e-07
NNU_07636	4.7459	Up	5.38862e-95
NNU_09942	4.74384	Up	7.69013e-122
NNU_19966	4.74137	Up	7.88274e-13
NNU_14334	4.74072	Up	7.83081e-78
NNU_06727	4.73944	Up	9.43824e-13
NNU_08946	4.73694	Up	5.74567e-11
NNU_04718	4.73525	Up	0.00155619
NNU_18701	4.73381	Up	0.0015626
NNU_14211	4.73323	Up	0.00156974
NNU_00251	4.73166	Up	0.00158086
NNU_14455	4.72969	Up	0.00159124
NNU_13809	4.72743	Up	5.94511e-90
NNU_05766	4.7266	Up	1.84889e-23
NNU_09739	4.7265	Up	5.28082e-09
NNU_23483	4.72557	Up	6.16605e-09
NNU_05075	4.72451	Up	0.00161724
NNU_08403	4.72309	Up	0
NNU_13635	4.72063	Up	5.16992e-23
NNU_20898	4.72048	Up	2.41224e-05
NNU_07011	4.71982	Up	3.53575e-07
NNU_26242	4.71303	Up	4.09893e-07
NNU_02031	4.70935	Up	2.0783e-39
BGI_novel_G001448	4.69909	Up	9.44865e-60
NNU_02644	4.69852	Up	2.93817e-74
BGI_novel_G001266	4.69846	Up	4.69485e-07
NNU_22092	4.69757	Up	2.76563e-05
NNU_03350	4.69512	Up	0
NNU_11351	4.6937	Up	9.43927e-57
NNU_25476	4.69055	Up	6.59663e-161
NNU_03498	4.68903	Up	7.97239e-154
NNU_06950	4.68554	Up	1.17846e-10
NNU_11096	4.6845	Up	5.56522e-07
NNU_03121	4.68243	Up	1.02013e-24
NNU_01650	4.67571	Up	2.0983e-67
NNU_19999	4.67556	Up	8.44469e-64
NNU_00779	4.67547	Up	3.40442e-38
NNU_21633	4.67479	Up	3.08995e-05
NNU_12731	4.67239	Up	1.40683e-289
NNU_11124	4.66716	Up	7.3938e-26
BGI_novel_G000797	4.66663	Up	2.20585e-31
NNU_19408	4.6664	Up	5.85854e-274
NNU_06447	4.66631	Up	3.05819e-26
NNU_11752	4.66629	Up	4.25665e-33
NNU_05681	4.66422	Up	9.62372e-21
NNU_11352	4.66276	Up	2.35277e-33
NNU_26501	4.66198	Up	0.00197897
NNU_26367	4.66161	Up	9.61583e-09
NNU_22280	4.65593	Up	7.14267e-19
BGI_novel_G000703	4.65543	Up	2.18849e-10
NNU_07796	4.65138	Up	3.50729e-05
NNU_07125	4.65005	Up	0
NNU_06963	4.64996	Up	3.51398e-05
NNU_12669	4.64917	Up	6.98949e-12
NNU_01235	4.64806	Up	6.52468e-40
NNU_20432	4.64522	Up	3.44379e-10
NNU_17837	4.63831	Up	1.30037e-20
NNU_06627	4.63532	Up	5.72039e-47
BGI_novel_G000995	4.63509	Up	1.10596e-30
NNU_20908	4.63506	Up	1.89138e-91
NNU_25561	4.63468	Up	1.22241e-15
NNU_07893	4.63279	Up	4.94236e-109
NNU_21064	4.63191	Up	0.00211547
NNU_01561	4.631	Up	0.00212587
NNU_08954	4.62915	Up	5.8528e-51
NNU_10341	4.62576	Up	4.08828e-05
NNU_16084	4.62397	Up	5.38201e-05
NNU_22746	4.62339	Up	4.63654e-17
NNU_19013	4.62332	Up	7.86774e-43
NNU_22861	4.62308	Up	0.00218695
NNU_12942	4.61832	Up	1.6083e-08
NNU_14523	4.61067	Up	0
NNU_24275	4.60762	Up	8.24144e-19
NNU_01756	4.60721	Up	6.08648e-93
NNU_25307	4.60274	Up	3.87597e-10
NNU_12305	4.60235	Up	7.24382e-62
NNU_10315	4.60099	Up	4.14123e-78
BGI_novel_G002185	4.59711	Up	2.23492e-48
NNU_16584	4.59413	Up	8.38123e-69
NNU_17553	4.59212	Up	2.13413e-08
NNU_14618	4.59168	Up	6.06545e-293
NNU_06433	4.59095	Up	1.03e-06
NNU_18536	4.58993	Up	1.10512e-11
NNU_01967	4.58938	Up	1.80879e-66
NNU_05821	4.58703	Up	1.96654e-26
NNU_06548	4.58498	Up	8.35069e-47
NNU_19829	4.58469	Up	0
NNU_02212	4.57721	Up	0.00247633
NNU_13969	4.57721	Up	0.00247633
NNU_05518	4.57715	Up	0.00247922
NNU_08472	4.57651	Up	4.10531e-10
NNU_12745	4.57511	Up	7.4526e-42
NNU_16568	4.5739	Up	0.0025044
NNU_17216	4.57372	Up	2.58943e-28
NNU_06823	4.57264	Up	5.22815e-43
NNU_12278	4.57099	Up	1.02207e-11
NNU_21245	4.57003	Up	0.00254887
NNU_14864	4.56576	Up	0.00257453
NNU_26465	4.5655	Up	0.00259143
BGI_novel_G002039	4.56466	Up	0.00259915
NNU_21161	4.56354	Up	1.13096e-06
NNU_26279	4.56011	Up	1.50998e-125
NNU_07616	4.55513	Up	6.79772e-10
NNU_16950	4.55508	Up	2.40608e-39
BGI_novel_G000012	4.55159	Up	5.91674e-18
NNU_05965	4.55003	Up	5.89934e-05
NNU_10187	4.54989	Up	2.22885e-143
NNU_19041	4.54954	Up	2.55003e-08
NNU_23409	4.54285	Up	1.46526e-06
NNU_05539	4.53952	Up	2.72299e-21
NNU_17840	4.53539	Up	2.98453e-35
NNU_23350	4.52972	Up	4.01441e-51
BGI_novel_G000761	4.52505	Up	0.00296849
BGI_novel_G001769	4.52128	Up	0.00302258
NNU_11007	4.5191	Up	1.54258e-218
NNU_14996	4.51811	Up	0.00293321
NNU_23400	4.51771	Up	1.43871e-37
NNU_02048	4.51766	Up	0.002934
NNU_21392	4.51744	Up	0.00293853
NNU_08006	4.51667	Up	0.00295256
NNU_09700	4.51653	Up	3.73e-06
NNU_03008	4.51149	Up	0.00299423
NNU_22845	4.51028	Up	0.00301876
NNU_22869	4.50865	Up	4.04018e-08
NNU_04616	4.50741	Up	2.0555e-06
NNU_22239	4.50455	Up	0.0030693
NNU_20463	4.50295	Up	7.87364e-24
NNU_19582	4.49921	Up	7.69493e-05
BGI_novel_G001748	4.49513	Up	4.83147e-08
NNU_25351	4.49307	Up	1.17105e-31
BGI_novel_G001875	4.4919	Up	2.18618e-15
NNU_04902	4.48848	Up	1.14677e-202
BGI_novel_G001065	4.48827	Up	3.46081e-50
NNU_06760	4.48824	Up	4.16015e-28
NNU_24746	4.48637	Up	2.71571e-20
NNU_18229	4.48633	Up	7.44766e-11
NNU_01740	4.48598	Up	4.62539e-08
BGI_novel_G001573	4.47996	Up	3.52998e-22
NNU_20793	4.47886	Up	3.87984e-14
NNU_20866	4.47871	Up	2.23528e-06
NNU_17893	4.47834	Up	2.17663e-06
NNU_25546	4.47541	Up	3.6946e-36
NNU_16368	4.47396	Up	2.18173e-59
NNU_17812	4.47322	Up	4.41284e-23
NNU_05104	4.4713	Up	8.74959e-05
NNU_04730	4.47128	Up	7.65151e-19
NNU_26385	4.46724	Up	4.17104e-14
NNU_11817	4.4641	Up	0
NNU_24539	4.4622	Up	1.11333e-33
NNU_09933	4.45919	Up	1.46206e-87
NNU_14878	4.459	Up	0.00345139
NNU_22872	4.45498	Up	2.18378e-09
NNU_00108	4.45253	Up	0.000115416
NNU_25756	4.43993	Up	1.08381e-07
NNU_21136	4.43497	Up	5.84472e-14
NNU_11534	4.42643	Up	5.34098e-252
BGI_novel_G001752	4.41365	Up	5.05435e-14
NNU_06714	4.41297	Up	3.23023e-09
NNU_02788	4.41272	Up	2.91189e-15
NNU_17862	4.41193	Up	1.16876e-28
BGI_novel_G000229	4.41008	Up	0.000124185
NNU_06744	4.40757	Up	1.39734e-111
NNU_04965	4.40586	Up	3.68122e-06
NNU_23857	4.40474	Up	3.80709e-06
NNU_09481	4.40117	Up	6.61647e-15
NNU_03274	4.39778	Up	4.31871e-34
NNU_08961	4.39718	Up	0.00407896
NNU_12869	4.3967	Up	4.62315e-07
NNU_04316	4.39661	Up	2.64999e-60
NNU_05576	4.3933	Up	0.00412992
NNU_11741	4.39209	Up	0.00414284
NNU_11260	4.39207	Up	0.00415063
NNU_08538	4.39207	Up	0.00415063
BGI_novel_G001424	4.39118	Up	0.00169771
NNU_13436	4.39058	Up	0.00417654
NNU_24405	4.38735	Up	0.000136248
NNU_06762	4.38692	Up	0.000132133
NNU_23381	4.3863	Up	0
NNU_10472	4.38487	Up	0.00013871
NNU_06023	4.376	Up	1.97251e-38
NNU_11222	4.37475	Up	2.13157e-48
NNU_21296	4.37416	Up	0.00439581
NNU_08211	4.37287	Up	2.5717e-65
NNU_19311	4.37116	Up	1.0394e-147
NNU_20601	4.36918	Up	1.23782e-34
NNU_10464	4.36711	Up	6.88531e-15
NNU_07226	4.36653	Up	0
NNU_07727	4.36274	Up	4.31216e-72
NNU_18788	4.35828	Up	0.000151844
NNU_20919	4.35771	Up	0.000153161
NNU_23945	4.356	Up	4.48707e-32
NNU_08127	4.35427	Up	0
NNU_12614	4.35239	Up	9.98757e-124
NNU_10360	4.35096	Up	2.9453e-60
NNU_08639	4.34916	Up	1.44083e-86
BGI_novel_G002087	4.34886	Up	1.93511e-07
NNU_24695	4.34241	Up	2.78696e-51
NNU_16887	4.3414	Up	2.36366e-296
BGI_novel_G001876	4.33988	Up	1.86003e-14
NNU_24979	4.33669	Up	4.8574e-275
NNU_17715	4.33635	Up	0
NNU_02876	4.33283	Up	0
NNU_07676	4.33169	Up	1.1765e-83
NNU_02089	4.3305	Up	0.0048665
NNU_05823	4.3281	Up	0.00490715
BGI_novel_G001481	4.32766	Up	6.87987e-06
NNU_21489	4.32588	Up	0.000180595
NNU_18534	4.32563	Up	5.73924e-10
NNU_25413	4.32491	Up	7.72327e-79
NNU_16684	4.32335	Up	8.66213e-09
NNU_17648	4.32247	Up	0.00500055
NNU_19507	4.32049	Up	1.08882e-08
NNU_03503	4.31717	Up	1.00098e-18
NNU_25961	4.31495	Up	3.21034e-38
NNU_25989	4.31343	Up	0.000214297
NNU_03928	4.31262	Up	3.73825e-257
NNU_12826	4.31204	Up	3.69854e-10
NNU_01469	4.30997	Up	9.76874e-24
NNU_20981	4.30985	Up	4.53831e-224
NNU_02871	4.3089	Up	2.45617e-07
NNU_19748	4.30533	Up	1.63012e-28
NNU_00756	4.30277	Up	4.07343e-67
NNU_16569	4.3023	Up	7.00037e-21
NNU_08514	4.29761	Up	0.00541407
NNU_05882	4.29309	Up	2.65692e-14
NNU_13668	4.29142	Up	0
NNU_13789	4.29086	Up	2.95907e-07
NNU_15786	4.29039	Up	1.54963e-19
NNU_13342	4.29017	Up	5.29945e-10
NNU_06149	4.28809	Up	2.82665e-41
NNU_07634	4.28262	Up	0.000233981
NNU_14092	4.27489	Up	1.73731e-23
NNU_07586	4.2743	Up	2.29526e-26
BGI_novel_G001711	4.27131	Up	6.01022e-142
NNU_10610	4.27069	Up	3.53302e-26
NNU_24929	4.2706	Up	9.74116e-13
NNU_12578	4.26703	Up	6.92862e-28
NNU_10608	4.26405	Up	3.31002e-165
NNU_18043	4.26336	Up	2.62413e-39
NNU_16951	4.25858	Up	0
NNU_09786	4.25315	Up	2.1676e-08
NNU_20906	4.25306	Up	0.00595536
NNU_09928	4.25248	Up	0.00597338
NNU_04327	4.25149	Up	5.71823e-15
NNU_12144	4.25032	Up	0.00600527
NNU_22123	4.24713	Up	2.47906e-12
NNU_03129	4.24598	Up	0.00611015
NNU_11730	4.24507	Up	0.00609957
NNU_08811	4.2447	Up	6.09671e-27
NNU_20582	4.24435	Up	1.4981e-20
NNU_03402	4.24294	Up	8.60225e-10
NNU_18887	4.2418	Up	6.01171e-07
NNU_01236	4.24109	Up	6.63641e-42
NNU_24457	4.23802	Up	2.30573e-267
NNU_14626	4.23472	Up	4.90003e-07
NNU_01154	4.23431	Up	0.00634121
NNU_07155	4.23096	Up	1.2458e-05
BGI_novel_G000904	4.22764	Up	2.81892e-46
NNU_11790	4.22675	Up	0.00645471
NNU_06692	4.22334	Up	0.00673943
NNU_11210	4.22217	Up	3.31054e-13
NNU_15830	4.22102	Up	1.1671e-41
NNU_18261	4.21731	Up	3.47434e-12
NNU_22546	4.2165	Up	3.36348e-65
BGI_novel_G001095	4.21476	Up	2.77207e-99
NNU_04844	4.20973	Up	0.00709291
NNU_09287	4.20918	Up	1.43509e-190
NNU_26075	4.20892	Up	2.06138e-42
NNU_19290	4.2064	Up	1.66264e-92
NNU_15952	4.20608	Up	1.89028e-47
BGI_novel_G000064	4.20408	Up	3.20692e-28
NNU_17383	4.20389	Up	0
NNU_08944	4.20284	Up	2.6661e-68
NNU_03820	4.20126	Up	6.31081e-07
BGI_novel_G000621	4.19833	Up	4.48449e-20
NNU_26143	4.19736	Up	0.000321474
NNU_13473	4.19507	Up	6.30721e-105
NNU_04082	4.19009	Up	2.17361e-17
NNU_16682	4.18872	Up	2.29636e-179
NNU_03226	4.18835	Up	2.78731e-108
NNU_05290	4.18738	Up	7.16458e-07
NNU_26023	4.18702	Up	1.31362e-49
NNU_03853	4.18648	Up	0.00702207
NNU_00910	4.18558	Up	1.01802e-25
NNU_06495	4.18535	Up	8.72127e-38
NNU_23577	4.18456	Up	1.18136e-82
NNU_08168	4.1834	Up	0.0070926
NNU_14015	4.1825	Up	4.2188e-08
NNU_19564	4.18236	Up	1.84673e-90
NNU_19376	4.18211	Up	0.00710392
NNU_25659	4.18091	Up	0.0071486
NNU_22340	4.18001	Up	0.00716402
NNU_26154	4.17968	Up	0
NNU_11086	4.17526	Up	0.0123084
NNU_07597	4.17504	Up	1.65748e-14
NNU_18738	4.17164	Up	2.102e-09
NNU_02215	4.17055	Up	0
NNU_23593	4.16955	Up	7.00322e-35
NNU_13470	4.16827	Up	9.33804e-07
NNU_06703	4.16808	Up	1.70052e-05
NNU_21506	4.16706	Up	1.09354e-06
BGI_novel_G000699	4.16488	Up	0.00804303
NNU_03946	4.16468	Up	4.11286e-34
NNU_26440	4.16401	Up	2.60512e-27
NNU_23412	4.16391	Up	0.007523
NNU_03225	4.15881	Up	5.00201e-08
NNU_18523	4.15601	Up	8.83864e-07
NNU_21281	4.15561	Up	7.56614e-214
BGI_novel_G001614	4.15535	Up	2.29544e-43
NNU_02821	4.15503	Up	1.81825e-147
NNU_22015	4.15213	Up	8.02469e-17
NNU_20543	4.15044	Up	7.27577e-35
BGI_novel_G001369	4.15004	Up	3.55018e-09
NNU_23804	4.14832	Up	2.4077e-46
NNU_10433	4.14702	Up	9.90374e-16
NNU_21564	4.14536	Up	8.24032e-59
NNU_23198	4.14451	Up	0
NNU_07971	4.14168	Up	5.87945e-33
NNU_17849	4.1402	Up	1.1448e-11
NNU_06514	4.13884	Up	1.07755e-93
BGI_novel_G001999	4.1374	Up	0.0135342
NNU_04227	4.13472	Up	2.56786e-05
BGI_novel_G000974	4.13307	Up	0.0129858
NNU_23793	4.13261	Up	1.22271e-154
NNU_21189	4.12896	Up	2.11737e-10
NNU_20406	4.12141	Up	0.00911488
NNU_23329	4.12091	Up	1.11821e-110
BGI_novel_G002106	4.11949	Up	0.00884123
NNU_02120	4.11942	Up	1.31105e-91
NNU_00877	4.11826	Up	3.52617e-209
NNU_25750	4.11302	Up	0.000541165
NNU_02363	4.11265	Up	1.17638e-25
NNU_17407	4.11099	Up	8.71926e-40
NNU_17602	4.10795	Up	4.13814e-25
NNU_04250	4.10757	Up	0.00851246
NNU_16872	4.10751	Up	8.57676e-21
NNU_19051	4.10725	Up	4.83079e-09
NNU_10312	4.10368	Up	0.00861042
NNU_10229	4.10368	Up	0.00861042
NNU_10548	4.10325	Up	0.00861059
NNU_14017	4.10058	Up	9.15425e-29
NNU_10718	4.10027	Up	0.00867936
NNU_04815	4.10009	Up	0.00871201
NNU_17959	4.0984	Up	2.1744e-68
NNU_15771	4.09722	Up	0.008786
NNU_17242	4.0964	Up	0.00878723
BGI_novel_G001603	4.09499	Up	6.705e-09
NNU_14301	4.09485	Up	0.00881908
BGI_novel_G001719	4.09469	Up	2.33812e-19
NNU_19035	4.09464	Up	9.9571e-115
NNU_06707	4.09422	Up	6.67567e-10
NNU_01692	4.09052	Up	2.88016e-156
NNU_24046	4.08909	Up	1.61451e-06
NNU_15781	4.08746	Up	0.00903958
NNU_05108	4.08618	Up	2.8267e-75
NNU_18046	4.08482	Up	0
NNU_14940	4.08252	Up	9.22837e-145
NNU_21862	4.08169	Up	0.00914045
NNU_18966	4.08151	Up	0.00919085
NNU_16554	4.0787	Up	4.25197e-05
NNU_24191	4.07831	Up	0
NNU_18939	4.07761	Up	2.31535e-18
NNU_17076	4.07739	Up	3.05336e-201
NNU_06007	4.07587	Up	2.66588e-182
NNU_23218	4.07279	Up	0.00937732
NNU_20392	4.0709	Up	0.00945368
NNU_18823	4.07075	Up	2.80952e-11
NNU_18045	4.06923	Up	7.69828e-35
NNU_19585	4.069	Up	2.36325e-17
NNU_21621	4.06844	Up	0
NNU_16361	4.06392	Up	4.30176e-05
NNU_23773	4.06137	Up	3.47011e-266
NNU_25329	4.05895	Up	1.17916e-137
NNU_04784	4.05634	Up	5.01665e-57
NNU_02429	4.0552	Up	3.44228e-05
NNU_14752	4.0546	Up	7.27506e-48
NNU_14439	4.05318	Up	2.36196e-50
NNU_14681	4.05294	Up	1.27753e-07
NNU_09929	4.05278	Up	4.39412e-17
NNU_05346	4.05227	Up	2.43041e-53
NNU_24431	4.04434	Up	2.65335e-146
BGI_novel_G000323	4.04173	Up	0.000727953
NNU_13737	4.03936	Up	5.59524e-36
BGI_novel_G000873	4.03849	Up	1.65556e-14
NNU_05572	4.03815	Up	2.11015e-45
NNU_19784	4.03768	Up	2.2129e-115
NNU_14527	4.03562	Up	0
NNU_03808	4.03556	Up	8.03794e-139
NNU_11662	4.03453	Up	0
NNU_05830	4.03362	Up	0.0104423
NNU_08807	4.03295	Up	1.60554e-14
NNU_09860	4.03223	Up	7.12139e-10
NNU_25630	4.03124	Up	2.68945e-12
NNU_19519	4.02945	Up	6.51282e-62
NNU_14357	4.028	Up	1.17478e-105
NNU_06763	4.02737	Up	6.29932e-156
NNU_12852	4.02658	Up	1.11588e-139
NNU_07118	4.02389	Up	0.0103701
NNU_01036	4.02354	Up	0.000676619
NNU_12843	4.02311	Up	0.0104015
NNU_11507	4.0218	Up	0.0104326
NNU_05216	4.0218	Up	0.0104326
NNU_02289	4.02054	Up	0.000690789
NNU_10544	4.02014	Up	0.0104718
NNU_18255	4.0198	Up	0.01048
NNU_23170	4.0198	Up	0.01048
NNU_25520	4.01827	Up	0.0105387
NNU_25724	4.01701	Up	0.0105881
NNU_05914	4.01437	Up	0.0106514
NNU_16350	4.01432	Up	0.0106335
NNU_26609	4.01318	Up	0
NNU_16020	4.01094	Up	7.41845e-73
NNU_17735	4.01035	Up	0.0107486
NNU_25215	4.00583	Up	0.0109247
NNU_12545	4.00155	Up	5.52429e-05
NNU_23947	4.00109	Up	3.18085e-06
NNU_22499	4.00086	Up	0.0110472
NNU_01182	3.99898	Up	1.81869e-22
BGI_novel_G000760	3.99837	Up	5.73328e-12
NNU_10212	3.99624	Up	3.36396e-22
BGI_novel_G000732	3.99477	Up	6.92867e-24
NNU_23618	3.98893	Up	3.39833e-07
BGI_novel_G001028	3.9788	Up	1.85763e-17
BGI_novel_G000999	3.97813	Up	0.000847818
NNU_23135	3.97542	Up	0.0163288
NNU_08857	3.97388	Up	0
NNU_23873	3.97379	Up	5.85331e-18
NNU_06470	3.97288	Up	1.57599e-09
NNU_19979	3.97252	Up	1.84487e-110
NNU_03361	3.97232	Up	8.21805e-32
NNU_02169	3.97156	Up	5.49e-26
NNU_09840	3.96963	Up	2.02895e-11
NNU_04265	3.96746	Up	0.000937423
NNU_16770	3.96604	Up	5.67993e-23
NNU_22945	3.9637	Up	0.0121761
NNU_25273	3.9595	Up	2.79073e-08
NNU_15671	3.95744	Up	0
NNU_02862	3.95668	Up	6.98723e-05
BGI_novel_G002001	3.95617	Up	0.0173587
NNU_18973	3.95535	Up	0.0124406
NNU_09779	3.94945	Up	2.98633e-33
NNU_20016	3.94831	Up	4.00108e-70
BGI_novel_G001726	3.94629	Up	0.000928945
NNU_22859	3.94066	Up	3.6119e-09
NNU_18975	3.93724	Up	3.46521e-200
NNU_23248	3.93578	Up	1.66305e-37
NNU_26340	3.93542	Up	2.81456e-245
NNU_23524	3.93489	Up	0.00108974
NNU_21838	3.93338	Up	1.32306e-178
NNU_11159	3.93337	Up	0
NNU_16466	3.93333	Up	1.91072e-51
NNU_11800	3.93293	Up	2.99466e-38
NNU_00991	3.93039	Up	0.00108193
NNU_25617	3.92888	Up	0.012898
NNU_18553	3.92743	Up	0.0129605
NNU_09593	3.92641	Up	1.15275e-122
NNU_26542	3.92626	Up	4.5881e-20
NNU_22002	3.92496	Up	0.013056
NNU_22632	3.92496	Up	0.013056
NNU_11740	3.92313	Up	2.75448e-15
NNU_06716	3.92123	Up	1.08699e-85
NNU_19078	3.91951	Up	2.862e-51
NNU_14394	3.91604	Up	0.0183062
BGI_novel_G001143	3.91486	Up	0.0178341
BGI_novel_G001144	3.91486	Up	0.0178341
NNU_09203	3.91449	Up	7.2287e-195
NNU_11052	3.91414	Up	2.47266e-24
NNU_09693	3.91398	Up	6.19906e-21
NNU_26026	3.91392	Up	0
NNU_12329	3.91209	Up	1.73989e-106
NNU_13724	3.91204	Up	0.0134871
NNU_17099	3.91102	Up	0.0140515
NNU_11842	3.91062	Up	0
NNU_14243	3.90892	Up	6.89485e-06
NNU_25243	3.90711	Up	8.74018e-05
NNU_12172	3.90594	Up	6.91605e-09
NNU_18442	3.90535	Up	0
NNU_16032	3.90494	Up	0.00110653
BGI_novel_G001102	3.90476	Up	7.92953e-101
NNU_16434	3.90245	Up	0.0138614
NNU_23120	3.90068	Up	9.27934e-06
NNU_25486	3.90064	Up	0.000134995
NNU_19189	3.89747	Up	0.0012086
NNU_04624	3.89681	Up	1.25223e-196
NNU_19690	3.89505	Up	0.0141401
NNU_07460	3.89395	Up	1.84624e-26
NNU_23481	3.89326	Up	5.62472e-11
BGI_novel_G001868	3.89159	Up	1.27961e-261
NNU_06226	3.89119	Up	0.0142019
NNU_05939	3.88866	Up	6.12672e-10
NNU_21926	3.88659	Up	9.60977e-22
NNU_22264	3.88288	Up	0.00133931
NNU_14240	3.87538	Up	0
NNU_11091	3.87251	Up	3.17622e-175
NNU_10949	3.87231	Up	1.73844e-78
NNU_21713	3.87119	Up	1.35899e-21
NNU_07405	3.87084	Up	0
NNU_22846	3.86564	Up	1.0749e-05
NNU_06345	3.86529	Up	1.79634e-105
NNU_17698	3.8647	Up	0
NNU_11788	3.86444	Up	0
NNU_05350	3.8642	Up	0.00129744
NNU_16213	3.8628	Up	0.0013513
NNU_22026	3.85816	Up	3.27811e-39
NNU_05019	3.85731	Up	1.29432e-28
NNU_15160	3.85623	Up	7.9124e-09
NNU_11787	3.85324	Up	1.62006e-153
NNU_24913	3.85248	Up	0.00150695
NNU_22727	3.85186	Up	1.36768e-63
NNU_20517	3.85183	Up	8.73266e-10
NNU_09134	3.85028	Up	0.000125716
NNU_18806	3.8478	Up	7.56279e-16
BGI_novel_G001325	3.84663	Up	0
NNU_15307	3.84468	Up	8.7219e-08
NNU_21612	3.84297	Up	3.47305e-20
NNU_22886	3.84186	Up	2.4904e-35
NNU_03449	3.83802	Up	0.0157364
NNU_22958	3.83762	Up	0.0157497
NNU_00181	3.83596	Up	0.0158286
NNU_23633	3.83366	Up	0
NNU_14256	3.83301	Up	2.62207e-171
NNU_22552	3.83186	Up	7.40772e-25
NNU_25382	3.83185	Up	4.73119e-173
NNU_12464	3.83142	Up	0
NNU_16611	3.83111	Up	0.0160086
NNU_17881	3.83109	Up	2.4885e-133
NNU_21920	3.8286	Up	0.016093
NNU_24677	3.8286	Up	0.016093
NNU_25705	3.82819	Up	0.0161066
NNU_05455	3.82799	Up	1.97569e-64
NNU_12605	3.82796	Up	5.68966e-54
NNU_18196	3.82534	Up	0.016268
NNU_25590	3.82534	Up	0.016268
NNU_07403	3.82063	Up	3.89662e-303
NNU_10645	3.81905	Up	0.0165111
NNU_00869	3.81889	Up	1.19401e-18
NNU_14966	3.81875	Up	2.38016e-22
NNU_09282	3.81821	Up	1.4045e-14
NNU_25008	3.81598	Up	1.00147e-12
NNU_13628	3.81493	Up	1.94083e-41
NNU_17495	3.81492	Up	1.08673e-226
NNU_06496	3.81479	Up	0
NNU_07607	3.81348	Up	0.000160171
NNU_04829	3.81325	Up	1.50662e-71
NNU_17981	3.8132	Up	1.53383e-36
NNU_14487	3.81266	Up	1.7361e-07
NNU_19699	3.81225	Up	9.47009e-38
NNU_07360	3.81201	Up	5.88693e-64
NNU_12500	3.81026	Up	8.80949e-175
NNU_17031	3.81024	Up	1.41492e-116
NNU_06287	3.80925	Up	2.05261e-36
NNU_24902	3.80819	Up	3.33856e-128
NNU_26290	3.80508	Up	2.67892e-60
BGI_novel_G000013	3.80508	Up	2.80824e-41
NNU_05969	3.80364	Up	1.23246e-11
NNU_02216	3.80315	Up	1.61164e-07
NNU_20445	3.80248	Up	0.0171521
NNU_02621	3.80233	Up	1.50538e-07
NNU_25878	3.79464	Up	2.31793e-19
NNU_18769	3.79448	Up	0.0180475
NNU_09478	3.79406	Up	1.5012e-07
NNU_24498	3.7915	Up	0.0176369
NNU_16852	3.78797	Up	9.34621e-36
NNU_10614	3.787	Up	3.87997e-12
NNU_18038	3.78663	Up	8.48596e-81
NNU_18066	3.78157	Up	1.5415e-235
NNU_09388	3.77813	Up	2.90989e-26
NNU_00765	3.77664	Up	6.99176e-36
NNU_17385	3.77624	Up	9.05723e-142
BGI_novel_G001992	3.775	Up	0.00188355
NNU_13765	3.77435	Up	0
NNU_04563	3.77434	Up	2.13474e-07
NNU_22415	3.77418	Up	5.28287e-82
NNU_07767	3.77397	Up	4.55695e-24
NNU_06853	3.77357	Up	2.34181e-105
NNU_15060	3.77325	Up	2.81281e-07
NNU_20365	3.7715	Up	0
NNU_04677	3.77077	Up	9.68462e-29
NNU_18111	3.7698	Up	0
NNU_00862	3.76494	Up	0
NNU_13020	3.76467	Up	8.93996e-53
NNU_17170	3.76272	Up	2.66266e-07
NNU_23706	3.75688	Up	1.11416e-46
NNU_24367	3.75687	Up	0
NNU_25314	3.75568	Up	4.208e-79
NNU_05338	3.75402	Up	1.06617e-148
BGI_novel_G001776	3.75304	Up	3.22059e-09
NNU_19971	3.75148	Up	9.98092e-87
NNU_03541	3.74954	Up	1.05597e-226
NNU_21836	3.74832	Up	3.15513e-34
NNU_15988	3.74561	Up	5.77951e-48
NNU_00664	3.74491	Up	6.60741e-15
NNU_24333	3.74422	Up	3.12986e-07
NNU_08799	3.7435	Up	3.0584e-55
NNU_25954	3.7398	Up	1.68515e-51
NNU_18391	3.73791	Up	2.55426e-237
NNU_26487	3.73614	Up	2.78985e-05
NNU_16219	3.7355	Up	3.29561e-05
NNU_18260	3.73299	Up	0.0196651
NNU_20930	3.73299	Up	0.0196651
NNU_05073	3.7323	Up	2.91655e-24
NNU_13126	3.73133	Up	0.019732
NNU_02711	3.73133	Up	0.019732
NNU_06878	3.73113	Up	0.00215644
NNU_07741	3.73088	Up	0
NNU_05801	3.73083	Up	1.30774e-29
NNU_25819	3.72835	Up	1.65796e-24
NNU_08374	3.72738	Up	0.0199345
NNU_03344	3.72738	Up	0.0199345
NNU_01729	3.72717	Up	8.35406e-20
NNU_15180	3.72627	Up	5.32931e-35
NNU_24101	3.72478	Up	1.56073e-23
NNU_09224	3.72301	Up	0.0201557
BGI_novel_G000754	3.72224	Up	0.00238333
NNU_21024	3.72214	Up	0.0201913
NNU_11129	3.72178	Up	0.00241943
NNU_25220	3.72158	Up	4.564e-307
NNU_15742	3.72106	Up	0.020192
NNU_14027	3.7199	Up	0.0202662
NNU_18650	3.71966	Up	0.0202927
NNU_18266	3.71858	Up	0.0203202
BGI_novel_G000249	3.71584	Up	2.54365e-25
NNU_17917	3.71543	Up	0.0204671
NNU_14997	3.71217	Up	3.8525e-21
NNU_14183	3.71027	Up	1.21601e-83
NNU_20301	3.70961	Up	6.57643e-09
NNU_01774	3.70936	Up	0
NNU_06591	3.7088	Up	1.14213e-41
NNU_14335	3.70535	Up	1.45881e-12
NNU_22325	3.70451	Up	2.30126e-41
NNU_14733	3.70312	Up	0
BGI_novel_G000688	3.70177	Up	1.374e-09
NNU_17101	3.70114	Up	0
NNU_19307	3.70027	Up	4.61075e-172
NNU_15767	3.69939	Up	2.55086e-39
NNU_04280	3.6983	Up	7.42914e-09
NNU_15230	3.69764	Up	2.08681e-14
NNU_13663	3.69403	Up	0.0215571
NNU_17753	3.69137	Up	0.0216716
NNU_06418	3.68933	Up	0
NNU_07630	3.68888	Up	0.0218407
NNU_00864	3.6875	Up	0
NNU_19031	3.6863	Up	2.37922e-14
NNU_13948	3.68238	Up	2.85146e-22
NNU_03654	3.68179	Up	9.97946e-38
NNU_12922	3.68121	Up	8.16407e-07
NNU_13480	3.67865	Up	4.28694e-06
NNU_12992	3.67738	Up	8.17555e-08
BGI_novel_G001751	3.67457	Up	0.00114001
NNU_16516	3.67439	Up	4.10478e-05
NNU_15286	3.67269	Up	8.09297e-16
NNU_24270	3.6724	Up	2.09213e-77
NNU_07452	3.67227	Up	4.9621e-30
NNU_01958	3.67167	Up	3.82609e-117
NNU_01908	3.66273	Up	2.31929e-70
NNU_13927	3.66227	Up	1.34795e-25
NNU_08048	3.66121	Up	0.000556257
NNU_09709	3.66078	Up	6.75858e-59
NNU_05509	3.65858	Up	8.94882e-20
NNU_13196	3.65854	Up	1.02127e-81
NNU_22241	3.65551	Up	1.4072e-41
NNU_10405	3.65367	Up	7.78542e-33
NNU_12029	3.6535	Up	0
NNU_17501	3.65187	Up	1.30121e-08
NNU_20318	3.6489	Up	0.0047014
NNU_13806	3.64678	Up	1.39786e-07
NNU_08679	3.6456	Up	0.000377238
NNU_21052	3.64436	Up	0.000360853
BGI_novel_G001194	3.64093	Up	1.16687e-05
NNU_21782	3.63923	Up	1.07796e-17
NNU_04464	3.63813	Up	0
NNU_07367	3.63713	Up	2.89019e-78
NNU_02894	3.63686	Up	0.00307936
NNU_06074	3.63613	Up	6.91499e-14
NNU_07257	3.63265	Up	7.47279e-44
NNU_05588	3.63162	Up	7.38659e-187
NNU_01993	3.63067	Up	0.00315372
NNU_14619	3.63003	Up	3.23448e-32
NNU_18574	3.62976	Up	2.3571e-19
NNU_07488	3.62634	Up	3.48517e-40
NNU_18156	3.62511	Up	0.0252448
NNU_07309	3.62486	Up	1.00433e-05
NNU_20500	3.62208	Up	0.00349276
NNU_16467	3.62197	Up	7.15813e-25
NNU_19063	3.62071	Up	2.12221e-57
NNU_01954	3.61943	Up	0.024718
NNU_21614	3.61758	Up	0.0248361
NNU_18790	3.61697	Up	2.98033e-187
NNU_24382	3.6155	Up	2.58714e-30
NNU_17376	3.61432	Up	0.0250412
NNU_05026	3.61432	Up	0.0250412
NNU_24308	3.61139	Up	5.10974e-05
NNU_17248	3.61069	Up	0.0252184
NNU_07357	3.60994	Up	6.33248e-19
NNU_21383	3.60948	Up	1.01428e-23
NNU_17048	3.60789	Up	0
NNU_24190	3.60686	Up	1.32706e-138
NNU_25722	3.60626	Up	3.11388e-09
NNU_09742	3.60459	Up	5.7558e-30
NNU_20721	3.60382	Up	3.08081e-187
NNU_16779	3.60347	Up	0.000493084
NNU_18815	3.60193	Up	4.1463e-69
NNU_24047	3.6017	Up	8.46834e-06
NNU_16177	3.60026	Up	0.025778
NNU_05436	3.60026	Up	0
NNU_17213	3.59939	Up	2.84614e-09
NNU_20548	3.59859	Up	5.85853e-27
NNU_25629	3.59741	Up	2.1186e-14
NNU_12580	3.59651	Up	2.38019e-08
NNU_10403	3.5952	Up	5.4022e-27
NNU_21669	3.59516	Up	1.03179e-10
NNU_17786	3.59321	Up	2.33887e-22
NNU_10788	3.58828	Up	2.59372e-08
NNU_02677	3.58662	Up	0
NNU_07474	3.58661	Up	6.02802e-38
NNU_22521	3.58461	Up	1.34395e-43
NNU_11994	3.57802	Up	4.88808e-57
NNU_18426	3.57632	Up	0.000550223
BGI_novel_G001436	3.57516	Up	4.00791e-23
NNU_14316	3.57428	Up	4.87009e-127
NNU_23401	3.5736	Up	9.06169e-78
NNU_18308	3.57237	Up	0.0274014
NNU_23083	3.57237	Up	0.0274014
NNU_03203	3.57229	Up	5.30722e-10
NNU_23274	3.57224	Up	3.4671e-298
NNU_07790	3.56632	Up	1.076e-05
NNU_19518	3.56494	Up	2.36633e-52
BGI_novel_G001668	3.55969	Up	0.0043481
NNU_10454	3.55938	Up	4.22883e-12
NNU_12412	3.55859	Up	0
NNU_05683	3.5554	Up	0.0284075
NNU_19289	3.55457	Up	2.40046e-12
NNU_22349	3.55339	Up	1.28859e-08
NNU_24821	3.55107	Up	0
NNU_18571	3.5499	Up	6.80762e-225
NNU_05618	3.54983	Up	2.94381e-21
NNU_18259	3.54492	Up	0
NNU_21346	3.54323	Up	2.79402e-82
NNU_17337	3.54171	Up	6.17293e-27
NNU_23854	3.54064	Up	0
NNU_24765	3.54045	Up	1.03304e-19
BGI_novel_G001356	3.5382	Up	8.97583e-08
NNU_06602	3.53293	Up	6.11268e-295
NNU_15200	3.53073	Up	0
BGI_novel_G000898	3.52852	Up	5.29501e-08
NNU_12759	3.52729	Up	0.00457823
NNU_00581	3.52693	Up	1.84958e-13
NNU_24280	3.52637	Up	0.0045332
NNU_02602	3.52543	Up	0.00457876
NNU_19864	3.523	Up	2.83733e-140
BGI_novel_G001451	3.52177	Up	1.5715e-57
NNU_06437	3.5196	Up	2.29337e-224
NNU_16528	3.5191	Up	0
BGI_novel_G001683	3.51875	Up	2.77484e-25
NNU_07100	3.51564	Up	4.34672e-26
NNU_07936	3.51537	Up	1.49735e-23
NNU_04580	3.51354	Up	3.42394e-20
NNU_25930	3.51137	Up	0.000751815
NNU_13648	3.5102	Up	8.74448e-76
NNU_14882	3.50907	Up	6.51179e-12
NNU_16166	3.50778	Up	2.37581e-35
NNU_02779	3.50766	Up	3.11496e-24
NNU_15324	3.50715	Up	1.75036e-24
NNU_24362	3.50675	Up	1.47319e-27
NNU_21461	3.50668	Up	0.0315592
NNU_03617	3.50634	Up	4.952e-84
NNU_26650	3.50531	Up	6.65514e-22
NNU_18656	3.50497	Up	6.15862e-65
NNU_14726	3.50418	Up	0.0317042
NNU_26009	3.50265	Up	2.76174e-123
NNU_14960	3.50056	Up	2.68119e-25
BGI_novel_G001613	3.49988	Up	1.27736e-07
NNU_24824	3.49904	Up	2.74972e-25
NNU_12206	3.49757	Up	4.26821e-06
NNU_07726	3.49465	Up	1.58841e-24
NNU_00605	3.494	Up	0.0315098
NNU_21011	3.49295	Up	1.97196e-24
NNU_12602	3.4923	Up	2.10581e-16
NNU_07170	3.49219	Up	0
NNU_18053	3.49219	Up	2.7207e-06
NNU_06078	3.48906	Up	0.0318284
BGI_novel_G002110	3.48788	Up	6.856e-07
NNU_08892	3.48773	Up	0.000116449
NNU_16474	3.48748	Up	0.0319216
NNU_24981	3.48691	Up	6.41613e-44
NNU_18625	3.4869	Up	4.02661e-291
NNU_10543	3.48575	Up	1.4747e-07
BGI_novel_G001140	3.48448	Up	0.000773862
NNU_00352	3.48232	Up	6.80606e-116
NNU_02797	3.47816	Up	7.4155e-30
NNU_17537	3.47799	Up	0.0325814
NNU_07948	3.47799	Up	0.0325814
NNU_15196	3.4737	Up	1.56712e-163
NNU_00042	3.47335	Up	8.22234e-15
NNU_09210	3.47135	Up	4.35895e-06
BGI_novel_G001044	3.47102	Up	0.000170559
NNU_10170	3.46985	Up	0.0330716
NNU_05039	3.4685	Up	9.07453e-243
NNU_08247	3.46838	Up	0
NNU_16179	3.46819	Up	0.0332337
NNU_26174	3.4676	Up	5.15002e-50
NNU_11075	3.46561	Up	0.0333906
NNU_24077	3.4654	Up	1.07054e-172
NNU_05940	3.46377	Up	3.47429e-144
NNU_23839	3.45958	Up	4.86945e-09
NNU_25442	3.4564	Up	0.0340016
NNU_15666	3.4564	Up	0.0340016
BGI_novel_G002153	3.45475	Up	1.04299e-28
NNU_15356	3.45277	Up	1.2917e-16
NNU_03906	3.45237	Up	5.74506e-29
NNU_13712	3.45043	Up	6.5577e-262
NNU_05439	3.44957	Up	5.98942e-29
BGI_novel_G001228	3.44829	Up	1.41113e-206
NNU_10080	3.44465	Up	1.29488e-10
NNU_21702	3.4446	Up	2.74791e-17
NNU_23391	3.44237	Up	1.11403e-243
NNU_09624	3.43999	Up	6.1257e-45
NNU_04479	3.43986	Up	3.51123e-81
NNU_21751	3.43879	Up	0
NNU_23175	3.43856	Up	1.57251e-51
NNU_10963	3.43736	Up	2.50984e-49
NNU_19558	3.43407	Up	4.40771e-120
NNU_04608	3.43382	Up	6.55093e-06
NNU_02583	3.43202	Up	0.000172891
NNU_06733	3.43192	Up	1.05728e-56
NNU_09270	3.43101	Up	7.19006e-43
NNU_02836	3.4304	Up	4.08822e-21
NNU_01101	3.43031	Up	3.20847e-79
NNU_05947	3.43031	Up	5.11934e-75
NNU_16784	3.42995	Up	5.2087e-08
NNU_02966	3.42967	Up	1.09363e-06
NNU_23759	3.42957	Up	6.73925e-08
NNU_07716	3.42909	Up	3.04351e-33
NNU_20185	3.42884	Up	9.50825e-236
NNU_24469	3.42755	Up	5.18591e-178
NNU_00225	3.42519	Up	1.44925e-06
NNU_20914	3.41848	Up	6.90197e-83
NNU_13314	3.41794	Up	0.00651976
NNU_22028	3.41581	Up	7.03093e-06
NNU_24486	3.41384	Up	2.1128e-31
NNU_03263	3.41248	Up	5.15851e-45
NNU_18548	3.41235	Up	0.00110314
NNU_05742	3.41191	Up	1.21876e-105
NNU_19405	3.41071	Up	0
NNU_01956	3.41039	Up	0.00112153
NNU_13303	3.41036	Up	4.77713e-05
NNU_20095	3.4096	Up	0.00696577
NNU_13412	3.40542	Up	0.00704749
NNU_20811	3.40306	Up	1.12954e-09
NNU_20355	3.40246	Up	0.000223672
NNU_00315	3.40079	Up	0.00134211
NNU_08656	3.39985	Up	0.000219827
NNU_16498	3.39921	Up	2.97574e-14
NNU_26000	3.39799	Up	8.09031e-28
NNU_07278	3.39713	Up	6.92936e-164
NNU_00438	3.39494	Up	1.30177e-113
NNU_14757	3.39191	Up	1.78457e-61
NNU_19462	3.39107	Up	6.25224e-132
NNU_21407	3.38984	Up	0
NNU_16083	3.38943	Up	1.04467e-08
NNU_17397	3.38413	Up	0
NNU_22076	3.38284	Up	7.1198e-110
NNU_00730	3.38041	Up	8.85592e-06
NNU_04195	3.38036	Up	9.12144e-09
NNU_25667	3.3792	Up	4.73788e-05
NNU_16775	3.37707	Up	1.53653e-32
NNU_15370	3.3764	Up	1.80245e-18
NNU_16831	3.37478	Up	1.6143e-109
NNU_01258	3.37342	Up	1.06241e-41
NNU_00650	3.37299	Up	9.91403e-131
NNU_26346	3.3721	Up	2.42105e-09
NNU_12616	3.372	Up	1.65456e-06
NNU_07857	3.37052	Up	0.000281262
NNU_11844	3.37043	Up	2.54186e-98
NNU_00766	3.36923	Up	0.00113978
NNU_14557	3.3686	Up	8.92924e-06
NNU_08872	3.36775	Up	9.20278e-11
NNU_08489	3.36757	Up	3.4388e-103
NNU_08422	3.36506	Up	0.00153115
BGI_novel_G001270	3.36279	Up	5.52731e-36
NNU_02036	3.36045	Up	2.55132e-99
NNU_19095	3.35393	Up	8.21231e-08
BGI_novel_G001290	3.35387	Up	0
NNU_26016	3.35312	Up	0.000261151
NNU_11505	3.3525	Up	0.00808577
NNU_11209	3.35233	Up	5.18371e-20
BGI_novel_G000501	3.35116	Up	0.00833102
NNU_11233	3.34866	Up	7.97214e-135
NNU_04444	3.34649	Up	4.12751e-57
NNU_14018	3.34625	Up	7.92905e-82
NNU_05999	3.34387	Up	0.00851984
NNU_15516	3.34295	Up	2.95028e-15
NNU_01308	3.34251	Up	0
NNU_11536	3.3417	Up	0.00852479
NNU_22108	3.34002	Up	8.61432e-43
NNU_18946	3.33711	Up	0.000372229
NNU_07435	3.33339	Up	7.88303e-137
NNU_26230	3.33112	Up	2.11522e-263
NNU_05746	3.33078	Up	2.46039e-31
NNU_14368	3.32999	Up	5.65193e-10
NNU_23866	3.32939	Up	6.33178e-72
NNU_17721	3.32765	Up	1.35649e-05
NNU_26629	3.3241	Up	3.51211e-32
NNU_05733	3.32303	Up	1.05985e-52
NNU_16640	3.32296	Up	4.66711e-21
NNU_00964	3.32273	Up	0.00183876
NNU_01909	3.32213	Up	5.27502e-89
NNU_21074	3.32191	Up	2.86951e-26
NNU_02975	3.3214	Up	3.34092e-94
NNU_00241	3.31932	Up	3.3927e-06
NNU_06891	3.31909	Up	4.06405e-209
NNU_02557	3.31884	Up	1.77661e-15
NNU_25982	3.31632	Up	4.38843e-85
BGI_novel_G000807	3.3143	Up	3.04838e-38
NNU_05747	3.31191	Up	1.12897e-25
NNU_16716	3.31152	Up	1.79397e-16
BGI_novel_G000622	3.30914	Up	2.14518e-29
NNU_13151	3.30677	Up	1.47822e-42
NNU_22836	3.30617	Up	6.65027e-135
NNU_15271	3.30496	Up	0
NNU_11141	3.30476	Up	3.24753e-182
NNU_02971	3.3044	Up	2.9212e-08
NNU_08917	3.30239	Up	2.76764e-29
NNU_14050	3.3015	Up	3.31514e-165
BGI_novel_G001822	3.30053	Up	1.48496e-09
NNU_20664	3.30051	Up	1.1406e-22
NNU_09197	3.30005	Up	0.00936663
NNU_21295	3.29985	Up	3.83658e-202
NNU_12993	3.2971	Up	0.00941477
NNU_11151	3.29678	Up	4.2645e-51
NNU_26357	3.29585	Up	5.22027e-29
NNU_23813	3.29547	Up	9.61103e-114
NNU_17888	3.29474	Up	0.0094939
NNU_16235	3.29403	Up	7.30927e-05
NNU_25780	3.29391	Up	0.00183957
NNU_22314	3.29293	Up	9.46663e-74
NNU_26298	3.29227	Up	0.000393528
NNU_08856	3.29176	Up	0
NNU_11381	3.29131	Up	2.29729e-15
NNU_20331	3.29106	Up	0.00977597
BGI_novel_G000486	3.28981	Up	3.73911e-06
NNU_03810	3.2894	Up	9.47387e-131
NNU_05927	3.28886	Up	0.000408125
NNU_00630	3.28882	Up	0.0100539
NNU_26390	3.28755	Up	0.00213712
NNU_16493	3.28572	Up	2.54668e-30
NNU_12251	3.28558	Up	3.03892e-87
NNU_18385	3.28504	Up	7.81589e-34
NNU_23865	3.28475	Up	2.66783e-07
NNU_06747	3.28378	Up	0.0103666
NNU_03222	3.28292	Up	2.34295e-09
NNU_16367	3.28108	Up	2.84189e-10
NNU_18991	3.28035	Up	2.62396e-09
NNU_02868	3.2801	Up	0.000526817
NNU_16220	3.27948	Up	0.0106253
NNU_01815	3.27839	Up	8.1619e-138
NNU_07466	3.27739	Up	2.4252e-102
NNU_24877	3.27646	Up	1.78629e-111
NNU_26547	3.2753	Up	2.36826e-07
BGI_novel_G000934	3.27397	Up	6.06251e-09
NNU_11905	3.27319	Up	0.00243727
NNU_24444	3.27298	Up	1.03547e-191
NNU_00248	3.27285	Up	1.61727e-34
NNU_09125	3.27074	Up	1.53381e-96
NNU_16758	3.26491	Up	0.00011286
NNU_23251	3.26487	Up	1.10439e-168
NNU_08588	3.26027	Up	1.0579e-102
NNU_06928	3.25979	Up	4.25069e-225
NNU_01576	3.25957	Up	0
NNU_06112	3.25874	Up	8.47501e-41
NNU_11585	3.25807	Up	4.25392e-36
NNU_19159	3.25796	Up	1.17929e-20
NNU_04183	3.25741	Up	1.08446e-27
NNU_06776	3.25449	Up	3.93446e-63
NNU_04711	3.25261	Up	9.95704e-99
NNU_21910	3.25254	Up	3.78863e-173
NNU_00949	3.25096	Up	1.15147e-39
NNU_23312	3.2503	Up	6.47486e-17
NNU_18533	3.24952	Up	4.52497e-143
NNU_19077	3.24593	Up	0
NNU_05006	3.2448	Up	0
NNU_11451	3.24462	Up	0.00254296
NNU_19327	3.24264	Up	0
NNU_12187	3.24083	Up	5.58594e-60
NNU_05192	3.24028	Up	0.000118707
NNU_12232	3.24019	Up	0
NNU_13538	3.23996	Up	0.000120618
NNU_12005	3.2391	Up	1.06743e-09
NNU_01333	3.23895	Up	9.69332e-53
BGI_novel_G000547	3.23753	Up	3.18755e-13
NNU_23699	3.23685	Up	8.79307e-206
NNU_00261	3.23639	Up	2.38023e-08
NNU_24447	3.23581	Up	0
NNU_24385	3.23547	Up	0
NNU_12485	3.23449	Up	2.15614e-10
NNU_24065	3.23408	Up	4.10526e-53
NNU_12878	3.23046	Up	0.0116796
NNU_04894	3.22916	Up	4.53203e-71
NNU_24357	3.22901	Up	0.0117039
NNU_21708	3.22777	Up	0.0117987
NNU_25089	3.22684	Up	1.01327e-15
NNU_11706	3.22476	Up	5.14613e-114
NNU_02146	3.22401	Up	7.83311e-58
NNU_26116	3.22188	Up	0
NNU_01552	3.22156	Up	0.0122217
NNU_16712	3.21961	Up	1.08115e-158
BGI_novel_G001387	3.21901	Up	2.21907e-10
NNU_15938	3.21803	Up	0
NNU_18891	3.21535	Up	0.020914
NNU_03290	3.21407	Up	1.75929e-10
NNU_16335	3.21371	Up	1.60074e-133
NNU_04106	3.21357	Up	0
NNU_21263	3.21297	Up	1.18191e-17
NNU_13322	3.20771	Up	1.62838e-113
NNU_16698	3.207	Up	0.00274422
NNU_03444	3.20688	Up	2.62356e-95
NNU_04072	3.20588	Up	4.26185e-05
NNU_00236	3.2041	Up	5.92147e-59
BGI_novel_G000623	3.20366	Up	1.88139e-24
NNU_17210	3.20261	Up	4.8616e-33
NNU_23169	3.20046	Up	2.76194e-23
NNU_05535	3.19858	Up	1.108e-07
NNU_26635	3.19631	Up	3.87989e-45
NNU_23253	3.19473	Up	2.57585e-130
BGI_novel_G000142	3.19257	Up	0.000779397
NNU_04447	3.192	Up	4.92837e-12
NNU_00222	3.19026	Up	6.58476e-136
NNU_06936	3.1901	Up	5.68698e-48
NNU_16508	3.18974	Up	6.43382e-08
NNU_05357	3.18856	Up	1.12785e-135
NNU_22359	3.18836	Up	0.00334484
NNU_24363	3.18815	Up	3.43017e-14
NNU_03063	3.18795	Up	5.83104e-07
NNU_12153	3.18792	Up	0.00367727
NNU_23415	3.18724	Up	4.53979e-103
NNU_00918	3.18463	Up	1.24984e-05
NNU_05110	3.18174	Up	1.90391e-34
NNU_16785	3.18154	Up	3.72744e-18
NNU_18335	3.18113	Up	6.15575e-43
BGI_novel_G000176	3.18034	Up	0.000243359
NNU_08224	3.17879	Up	1.59205e-146
NNU_26030	3.17688	Up	1.76951e-74
BGI_novel_G001086	3.17633	Up	6.34982e-05
NNU_03399	3.17452	Up	7.77116e-119
NNU_23437	3.17419	Up	8.50427e-303
NNU_26144	3.17365	Up	3.7495e-16
NNU_18936	3.1718	Up	7.06125e-07
BGI_novel_G000943	3.16811	Up	3.08392e-06
NNU_06116	3.16723	Up	1.99701e-44
NNU_11618	3.16613	Up	1.01294e-223
NNU_14611	3.16578	Up	2.30368e-202
NNU_17757	3.16428	Up	0.013978
NNU_24942	3.16425	Up	6.48987e-38
NNU_26582	3.1622	Up	1.5361e-06
NNU_11592	3.16048	Up	1.23117e-277
NNU_06126	3.15933	Up	7.52926e-11
NNU_06000	3.15796	Up	7.05169e-34
NNU_09062	3.15732	Up	0.00380428
NNU_07228	3.15638	Up	1.65212e-22
NNU_09005	3.15565	Up	4.21084e-174
NNU_10623	3.15544	Up	0.0144854
NNU_21071	3.15533	Up	9.36552e-39
BGI_novel_G001272	3.1538	Up	1.94064e-11
NNU_05719	3.1503	Up	8.81326e-23
NNU_24834	3.14968	Up	1.84342e-19
NNU_17389	3.14955	Up	4.64299e-42
NNU_20455	3.14748	Up	1.24469e-194
NNU_16678	3.14746	Up	0.0153947
NNU_00902	3.14726	Up	5.46928e-05
NNU_20586	3.14347	Up	1.73785e-60
NNU_16949	3.14272	Up	3.39687e-13
NNU_08282	3.14102	Up	0.0162829
NNU_04411	3.13857	Up	1.31457e-16
NNU_12456	3.1366	Up	1.15886e-27
NNU_13185	3.13025	Up	4.81851e-34
NNU_26425	3.1302	Up	9.44168e-51
BGI_novel_G001180	3.12964	Up	0.0033604
NNU_01135	3.12929	Up	0.00103842
NNU_08351	3.12897	Up	1.37818e-06
NNU_11965	3.12583	Up	0
NNU_25054	3.12379	Up	4.48645e-294
NNU_20407	3.12368	Up	0.00389227
NNU_11273	3.1232	Up	3.96078e-141
BGI_novel_G000731	3.12266	Up	0.0177293
BGI_novel_G001188	3.12132	Up	3.93297e-08
NNU_25384	3.11935	Up	0.00389606
NNU_02151	3.11911	Up	9.6749e-109
NNU_10055	3.11617	Up	1.47789e-94
NNU_23070	3.11545	Up	1.26263e-202
NNU_02790	3.11496	Up	0.00405294
NNU_04974	3.11431	Up	1.49393e-127
NNU_22928	3.11077	Up	6.10346e-61
[truncated: 7,812 more rows]

## Sheet: Table S3
Table S3 Information of DEPs between FP and CP
No.	Protein_ID	Mean_Ratio_CP-VS-FP	P-value_CP-VS-FP
5957	NNU_24602-RA	7.26	5.42e-10
2479	NNU_18322-RA	4.49	0.001975
2290	NNU_15361-RA	3.32	2.68e-08
5436	NNU_15044-RA	2.81	0.01527
5016	NNU_16368-RA	2.72	4.46e-09
5942	NNU_23200-RA	2.59	1.12e-08
5478	NNU_23196-RA	2.45	6.7e-08
5858	NNU_09710-RA	2.3	4.95e-08
6230	NNU_02876-RA	2.3	1.95e-10
6423	NNU_25155-RA	2.22	3.43e-10
4389	NNU_24093-RA	2.18	2.71e-08
6105	NNU_15912-RA	2.16	1.6e-12
520	NNU_10909-RA	2.15	1.76e-08
2835	NNU_12936-RA	2.15	1.29e-06
4700	NNU_02538-RA	2.14	1.43e-09
741	NNU_21784-RA	2.1	2.04e-07
3222	NNU_11580-RA	2.08	5.15e-10
4247	NNU_01873-RA	2.02	6.15e-08
4852	NNU_05011-RA	1.99	2.33e-09
1283	NNU_15671-RA	1.98	1.68e-12
3739	NNU_11644-RA	1.98	1.01e-08
1718	NNU_20224-RA	1.95	2.88e-08
2631	NNU_12996-RA	1.95	1.62e-09
1331	NNU_00029-RA	1.94	2.1e-11
4472	NNU_09913-RA	1.92	6.84e-09
3962	NNU_24708-RA	1.91	0.006764
6024	NNU_15978-RA	1.91	3.39e-09
6275	NNU_10241-RA	1.91	2.03e-09
1380	NNU_23018-RA	1.89	3.83e-09
5281	NNU_17193-RA	1.89	2.4e-05
5644	NNU_01512-RA	1.89	3.54e-09
4860	NNU_14049-RA	1.88	2.08e-10
3971	NNU_26610-RA	1.87	4.45e-09
6352	NNU_12875-RA	1.86	1.04e-07
5774	NNU_07210-RA	1.85	9.77e-12
6044	NNU_16100-RA	1.85	4.49e-08
3691	NNU_25850-RA	1.84	1.45e-10
5461	NNU_18248-RA	1.81	4.41e-11
4833	NNU_05007-RA	1.8	6.94e-06
2081	NNU_25643-RA	1.78	2.13e-06
3363	NNU_15278-RA	1.78	3.51e-11
4553	NNU_13660-RA	1.78	1.1e-08
1172	NNU_00533-RA	1.77	1.07e-08
6414	NNU_01434-RA	1.77	0.0001618
4475	NNU_04039-RA	1.76	0.003655
2054	NNU_24987-RA	1.75	1.59e-08
3873	NNU_05333-RA	1.75	5.31e-07
3333	NNU_05866-RA	1.74	3.11e-09
262	NNU_01853-RA	1.73	3.42e-08
447	NNU_09403-RA	1.72	2.16e-06
1307	NNU_06902-RA	1.72	5.07e-06
390	NNU_19063-RA	1.69	0.001959
2729	NNU_25207-RA	1.69	1.17e-07
4353	NNU_18174-RA	1.69	1.35e-06
1130	NNU_08058-RA	1.68	3.63e-08
2869	NNU_06619-RA	1.68	4.57e-13
5939	NNU_08711-RA	1.68	6.67e-08
6312	NNU_06449-RA	1.68	6.39e-08
1949	NNU_11585-RA	1.67	2.29e-09
2112	NNU_13917-RA	1.67	1.37e-08
3129	NNU_15031-RA	1.67	1.38e-06
4075	NNU_19602-RA	1.67	5.38e-06
6082	NNU_08981-RA	1.66	3.17e-07
6678	NNU_25463-RA	1.66	1.67e-05
772	NNU_20644-RA	1.65	9.36e-09
4161	NNU_06454-RA	1.64	1.18e-05
544	NNU_02973-RA	1.63	1.51e-08
2200	NNU_02186-RA	1.63	1.02e-09
2577	NNU_02879-RA	1.63	2.19e-08
2752	NNU_05129-RA	1.63	5.24e-07
101	NNU_03109-RA	1.62	9.15e-07
745	NNU_24598-RA	1.62	7.68e-05
2252	NNU_06496-RA	1.62	1.12e-11
3470	NNU_15862-RA	1.61	5.21e-10
6215	NNU_06152-RA	1.61	1.9e-10
2775	NNU_18910-RA	1.6	2.32e-08
3800	NNU_03128-RA	1.6	4.23e-10
6255	NNU_00248-RA	1.6	7.42e-07
930	NNU_12272-RA	1.59	1.38e-05
3137	NNU_16773-RA	1.59	2.82e-08
190	NNU_02211-RA	1.58	1.18e-07
4318	NNU_24012-RA	1.58	3e-06
6698	NNU_05767-RA	1.58	1.57e-09
24	NNU_20835-RA	1.57	0.004303
1270	NNU_02180-RA	1.57	7.24e-09
3216	NNU_26035-RA	1.57	0.0002992
3919	NNU_08036-RA	1.57	3.78e-07
4620	NNU_00480-RA	1.57	0.0003027
809	NNU_21183-RA	1.56	7.06e-07
1596	NNU_17448-RA	1.56	1.33e-08
4699	NNU_17577-RA	1.56	3.37e-07
891	NNU_06076-RA	1.55	5.99e-07
2950	NNU_15312-RA	1.55	2.29e-06
4341	NNU_19514-RA	1.55	2.82e-06
692	NNU_16194-RA	1.54	4.52e-06
1147	NNU_11707-RA	1.54	1.19e-06
4527	NNU_10554-RA	1.54	5.69e-08
4735	NNU_13576-RA	1.54	0.001392
6472	NNU_02520-RA	1.54	4.42e-10
39	NNU_05344-RA	1.53	4.2e-05
311	NNU_02765-RA	1.53	4.45e-06
328	NNU_11686-RA	1.53	6.87e-08
442	NNU_19408-RA	1.53	0.04545
2948	NNU_02198-RA	1.53	5.54e-07
1509	NNU_23402-RA	1.52	1.54e-06
1250	NNU_14681-RA	1.51	0.000161
2181	NNU_00376-RA	1.51	1.88e-07
2750	NNU_06534-RA	1.51	4.46e-07
3330	NNU_15318-RA	1.51	0.0003376
4787	NNU_21632-RA	1.51	6.18e-09
1127	NNU_14620-RA	1.5	4.33e-07
1900	NNU_25277-RA	1.5	1.83e-08
4390	NNU_13221-RA	1.5	8.37e-12
6088	NNU_23524-RA	1.5	1.65e-05
467	NNU_08415-RA	1.49	4.29e-06
1464	NNU_06824-RA	1.49	6.84e-07
5232	NNU_05066-RA	1.49	1.28e-07
5859	NNU_17814-RA	1.49	9.2e-09
1361	NNU_06697-RA	1.48	1.9e-09
2216	NNU_11593-RA	1.48	5.83e-08
3562	NNU_17036-RA	1.48	1.31e-07
3719	NNU_05264-RA	1.48	0.0001081
4055	NNU_17536-RA	1.48	7.72e-06
959	NNU_04253-RA	1.47	1.52e-05
1185	NNU_25306-RA	1.47	3.24e-07
1545	NNU_20450-RA	1.47	4.6e-08
1569	NNU_04184-RA	1.47	2.73e-07
2013	NNU_00465-RA	1.47	7.86e-05
3858	NNU_02159-RA	1.47	7.4e-06
3874	NNU_12990-RA	1.47	4.93e-14
5356	NNU_01411-RA	1.47	0.0008997
6651	NNU_22408-RA	1.47	0.004026
89	NNU_22614-RA	1.46	6.15e-11
2536	NNU_26267-RA	1.46	1.08e-05
3033	NNU_07500-RA	1.46	0.02163
252	NNU_10126-RA	1.45	1.64e-08
804	NNU_06302-RA	1.45	3.78e-08
2428	NNU_20256-RA	1.45	3.15e-08
3536	NNU_20257-RA	1.45	3.51e-07
4529	NNU_04414-RA	1.45	3.06e-08
903	NNU_14682-RA	1.44	6.74e-05
1042	NNU_07912-RA	1.44	1.01e-08
1506	NNU_14751-RA	1.44	8.31e-07
2098	NNU_05481-RA	1.44	9.25e-09
3322	NNU_08758-RA	1.44	3.49e-06
4024	NNU_23748-RA	1.44	1.17e-09
4160	NNU_13339-RA	1.44	7.38e-10
2735	NNU_14406-RA	1.43	0.0055
3989	NNU_09561-RA	1.43	1.53e-08
5064	NNU_06154-RA	1.43	7.78e-09
5596	NNU_23917-RA	1.43	6.63e-06
5609	NNU_16860-RA	1.43	4.32e-10
5885	NNU_02525-RA	1.43	1.53e-12
715	NNU_24292-RA	1.42	0.003966
1245	NNU_12173-RA	1.42	3.85e-07
1346	NNU_12866-RA	1.42	4.26e-09
2259	NNU_01576-RA	1.42	2.4e-05
3412	NNU_14091-RA	1.42	0.003443
4141	NNU_20229-RA	1.42	1.98e-09
4885	NNU_12047-RA	1.42	3e-08
6227	NNU_07213-RA	1.42	3.61e-07
354	NNU_14241-RA	1.41	2.88e-08
974	NNU_23481-RA	1.41	0.0001203
1869	NNU_11788-RA	1.41	3.51e-06
2340	NNU_05751-RA	1.41	1.01e-06
3104	NNU_18519-RA	1.41	7.42e-08
4059	NNU_10311-RA	1.41	2.05e-05
6006	NNU_04038-RA	1.41	0.000185
158	NNU_22847-RA	1.4	0.0008995
284	NNU_08325-RA	1.4	5.33e-05
807	NNU_08204-RA	1.4	2.33e-05
1322	NNU_23381-RA	1.4	3.67e-11
1582	NNU_16352-RA	1.4	1.26e-08
2072	NNU_14390-RA	1.4	0.0004726
4554	NNU_20365-RA	1.4	3.02e-06
4822	NNU_07534-RA	1.4	3.64e-09
6169	NNU_25788-RA	1.4	9.46e-09
6245	NNU_08205-RA	1.4	1.14e-06
314	NNU_07161-RA	1.39	3.21e-06
397	NNU_20467-RA	1.39	8.82e-05
1178	NNU_02503-RA	1.39	4.81e-06
1593	NNU_15022-RA	1.39	1.08e-07
1726	NNU_15587-RA	1.39	1.14e-05
2716	NNU_23273-RA	1.39	6.65e-06
3306	NNU_11557-RA	1.39	3.16e-07
5604	NNU_06982-RA	1.39	4.94e-07
5985	NNU_20302-RA	1.39	1.36e-07
6408	NNU_02739-RA	1.39	8.6e-05
218	NNU_01788-RA	1.38	1.82e-05
376	NNU_22456-RA	1.38	5.66e-09
1139	NNU_15067-RA	1.38	3.88e-05
1162	NNU_19211-RA	1.38	2.68e-05
1330	NNU_02479-RA	1.38	6.78e-09
2089	NNU_11879-RA	1.38	2.71e-05
2815	NNU_08298-RA	1.38	6.84e-11
2917	NNU_05780-RA	1.38	0.00442
4537	NNU_26312-RA	1.38	2.12e-05
5345	NNU_03513-RA	1.38	8.89e-06
6815	NNU_01698-RA	1.38	6.25e-06
935	NNU_12073-RA	1.37	5.58e-07
1611	NNU_09514-RA	1.37	2.85e-09
1791	NNU_17928-RA	1.37	0.0006069
2159	NNU_05205-RA	1.37	3.27e-08
2276	NNU_24784-RA	1.37	5.02e-06
3910	NNU_25903-RA	1.37	9.39e-05
3937	NNU_01496-RA	1.37	6.1e-10
3985	NNU_05092-RA	1.37	2.14e-05
6351	NNU_24553-RA	1.37	2.24e-08
6527	NNU_05663-RA	1.37	3.86e-08
6614	NNU_12011-RA	1.37	0.0003125
1382	NNU_08586-RA	1.36	4.73e-08
1747	NNU_25625-RA	1.36	1.08e-09
2608	NNU_09687-RA	1.36	6.41e-08
3804	NNU_19662-RA	1.36	0.005641
4789	NNU_07386-RA	1.36	2.88e-05
5674	NNU_08954-RA	1.36	9.59e-07
6537	NNU_04690-RA	1.36	5.81e-05
1057	NNU_19911-RA	1.35	0.0009687
1111	NNU_01155-RA	1.35	0.001032
2925	NNU_18975-RA	1.35	2.1e-13
3121	NNU_23389-RA	1.35	0.03107
4694	NNU_07274-RA	1.35	0.0004087
4706	NNU_20785-RA	1.35	5.73e-07
5177	NNU_03313-RA	1.35	3.89e-07
5520	NNU_23744-RA	1.35	2.43e-06
6098	NNU_17796-RA	1.35	3.76e-06
6463	NNU_01683-RA	1.35	4.44e-06
6553	NNU_01475-RA	1.35	9.46e-07
108	NNU_01774-RA	1.34	1.25e-05
1274	NNU_15998-RA	1.34	6.84e-07
1576	NNU_21801-RA	1.34	4.67e-10
3307	NNU_24404-RA	1.34	1.04e-07
3375	NNU_21805-RA	1.34	4.94e-10
4133	NNU_20896-RA	1.34	1.13e-08
4790	NNU_08609-RA	1.34	0.000916
5344	NNU_09178-RA	1.34	0.0005182
6353	NNU_18863-RA	1.34	2.53e-07
345	NNU_21524-RA	1.33	2.85e-07
896	NNU_04458-RA	1.33	4.82e-05
1020	NNU_08757-RA	1.33	1.57e-05
1040	NNU_12676-RA	1.33	1.94e-05
1160	NNU_12079-RA	1.33	1.24e-06
1695	NNU_08519-RA	1.33	8.59e-09
2669	NNU_04233-RA	1.33	1.07e-08
2851	NNU_08402-RA	1.33	0.0005201
3292	NNU_13012-RA	1.33	0.0003555
3391	NNU_06315-RA	1.33	4.41e-07
4002	NNU_12294-RA	1.33	1.72e-06
5598	NNU_17497-RA	1.33	7.42e-05
61	NNU_21370-RA	1.32	6.14e-05
342	NNU_21134-RA	1.32	1.46e-09
401	NNU_04519-RA	1.32	7.25e-06
856	NNU_04600-RA	1.32	6.38e-06
1188	NNU_01429-RA	1.32	1.03e-06
1852	NNU_08384-RA	1.32	4.07e-05
2295	NNU_08289-RA	1.32	0.001196
3821	NNU_18051-RA	1.32	6.4e-05
4073	NNU_18188-RA	1.32	0.0006972
4638	NNU_10558-RA	1.32	5.2e-05
5633	NNU_12657-RA	1.32	0.0002439
5805	NNU_01571-RA	1.32	3.21e-08
6362	NNU_01080-RA	1.32	6.04e-09
12	NNU_14527-RA	1.31	1.2e-05
306	NNU_06190-RA	1.31	0.0002924
1742	NNU_23342-RA	1.31	0.0003624
2078	NNU_24457-RA	1.31	6.8e-10
2318	NNU_13703-RA	1.31	1.28e-09
2791	NNU_15776-RA	1.31	1.56e-07
3012	NNU_17901-RA	1.31	1.02e-06
3260	NNU_24843-RA	1.31	6.66e-05
3570	NNU_11710-RA	1.31	2.54e-07
3875	NNU_26435-RA	1.31	0.007329
3908	NNU_14235-RA	1.31	2.87e-05
3979	NNU_10991-RA	1.31	2.86e-05
4014	NNU_15643-RA	1.31	7.64e-08
4303	NNU_03053-RA	1.31	0.00153
4382	NNU_21368-RA	1.31	1.27e-05
4747	NNU_26202-RA	1.31	2.3e-06
4919	NNU_11130-RA	1.31	3.12e-09
5835	NNU_02751-RA	1.31	1.84e-09
6217	NNU_12775-RA	1.31	1.99e-05
6569	NNU_04448-RA	1.31	2.3e-05
6699	NNU_23633-RA	1.31	5.5e-09
84	NNU_26321-RA	1.3	4.51e-06
379	NNU_11377-RA	1.3	0.01909
1857	NNU_06552-RA	1.3	3.75e-06
1982	NNU_09314-RA	1.3	2.6e-07
2105	NNU_13991-RA	1.3	3.52e-05
2658	NNU_14066-RA	1.3	1.1e-05
4215	NNU_07123-RA	1.3	2.38e-07
4217	NNU_12388-RA	1.3	0.01797
4538	NNU_12549-RA	1.3	0.0001382
4546	NNU_17419-RA	1.3	5.7e-07
4695	NNU_21321-RA	1.3	3.68e-06
4847	NNU_14083-RA	1.3	5.9e-05
5010	NNU_25253-RA	1.3	8.51e-08
5050	NNU_12810-RA	1.3	1.2e-06
5960	NNU_03781-RA	1.3	1.83e-06
53	NNU_07909-RA	1.29	0.0001071
324	NNU_21085-RA	1.29	5.46e-07
413	NNU_15658-RA	1.29	7.92e-05
517	NNU_18395-RA	1.29	8.97e-11
1285	NNU_20123-RA	1.29	5.07e-06
1518	NNU_01542-RA	1.29	0.0007434
1780	NNU_13156-RA	1.29	0.0003833
2375	NNU_18457-RA	1.29	0.0006237
2653	NNU_26169-RA	1.29	2.03e-06
3302	NNU_01178-RA	1.29	3.36e-07
3478	NNU_03055-RA	1.29	1.28e-07
3551	NNU_17453-RA	1.29	0.003063
4380	NNU_05884-RA	1.29	6.47e-10
4715	NNU_17216-RA	1.29	1.1e-07
4947	NNU_12599-RA	1.29	0.0003349
4948	NNU_20282-RA	1.29	1.25e-05
5211	NNU_04306-RA	1.29	0.0006825
6163	NNU_05043-RA	1.29	4.79e-08
556	NNU_22367-RA	1.28	2.06e-10
851	NNU_17101-RA	1.28	4.81e-07
976	NNU_15928-RA	1.28	1.82e-05
1014	NNU_11236-RA	1.28	0.002977
1320	NNU_01046-RA	1.28	2.96e-08
2502	NNU_09442-RA	1.28	2.88e-08
2993	NNU_18530-RA	1.28	0.0003074
3566	NNU_13901-RA	1.28	1.07e-07
3610	NNU_15555-RA	1.28	0.000127
3751	NNU_04903-RA	1.28	0.002696
3915	NNU_13916-RA	1.28	3.73e-10
4081	NNU_07823-RA	1.28	0.0005213
4552	NNU_21731-RA	1.28	1.5e-05
5038	NNU_21124-RA	1.28	4.28e-06
5248	NNU_01102-RA	1.28	2.13e-05
5385	NNU_24378-RA	1.28	3.81e-06
5917	NNU_03687-RA	1.28	1.27e-07
5918	NNU_23636-RA	1.28	5.26e-06
325	NNU_16351-RA	1.27	4.04e-05
550	NNU_26669-RA	1.27	1.47e-06
1152	NNU_20108-RA	1.27	0.000242
1315	NNU_16297-RA	1.27	1.74e-06
1667	NNU_18446-RA	1.27	1.61e-05
1849	NNU_17738-RA	1.27	3.93e-08
1923	NNU_01997-RA	1.27	3.52e-06
1992	NNU_06640-RA	1.27	0.0001347
2278	NNU_22277-RA	1.27	2.42e-05
2648	NNU_08016-RA	1.27	3.73e-07
3456	NNU_10798-RA	1.27	5.14e-06
3589	NNU_20219-RA	1.27	5.23e-07
3841	NNU_20738-RA	1.27	3.14e-06
3972	NNU_01728-RA	1.27	1.72e-06
4162	NNU_24060-RA	1.27	5.19e-08
4444	NNU_08312-RA	1.27	4.48e-10
5302	NNU_18785-RA	1.27	3.91e-07
5311	NNU_19435-RA	1.27	3.27e-06
5668	NNU_00767-RA	1.27	0.002641
6239	NNU_23597-RA	1.27	8.12e-06
6257	NNU_09134-RA	1.27	0.0007711
6318	NNU_02539-RA	1.27	4.95e-08
6450	NNU_10823-RA	1.27	0.0002047
6679	NNU_01405-RA	1.27	1.39e-08
6692	NNU_00823-RA	1.27	1.8e-08
194	NNU_17377-RA	1.26	9.08e-11
528	NNU_25482-RA	1.26	1.52e-06
568	NNU_02773-RA	1.26	5.8e-05
606	NNU_01531-RA	1.26	2.04e-08
707	NNU_05991-RA	1.26	3.13e-06
748	NNU_13190-RA	1.26	1.39e-06
839	NNU_03154-RA	1.26	2.56e-05
1901	NNU_09560-RA	1.26	2.25e-05
2420	NNU_09773-RA	1.26	9.14e-08
2467	NNU_13918-RA	1.26	0.0003077
2501	NNU_02476-RA	1.26	0.000302
2529	NNU_16927-RA	1.26	2.45e-07
2680	NNU_07995-RA	1.26	2.2e-05
3197	NNU_06487-RA	1.26	2.77e-06
3509	NNU_23898-RA	1.26	1.74e-05
3955	NNU_07892-RA	1.26	0.0004573
4321	NNU_13634-RA	1.26	7.46e-05
4780	NNU_20934-RA	1.26	1.88e-09
4952	NNU_21460-RA	1.26	0.01784
5013	NNU_00698-RA	1.26	7.06e-11
5454	NNU_00065-RA	1.26	4.31e-06
5456	NNU_21019-RA	1.26	2.92e-06
5737	NNU_15095-RA	1.26	3.05e-06
5877	NNU_18258-RA	1.26	1.12e-06
6032	NNU_04126-RA	1.26	5.54e-07
6034	NNU_01626-RA	1.26	1.91e-06
6093	NNU_26357-RA	1.26	3.78e-05
6233	NNU_20124-RA	1.26	0.0001054
6785	NNU_26450-RA	1.26	1.72e-09
769	NNU_10660-RA	1.25	0.006695
824	NNU_16013-RA	1.25	3.12e-07
1225	NNU_02898-RA	1.25	3.87e-07
2199	NNU_01334-RA	1.25	4.5e-06
2781	NNU_23605-RA	1.25	3.8e-07
3122	NNU_18693-RA	1.25	0.02206
3148	NNU_16723-RA	1.25	5.94e-05
3413	NNU_10230-RA	1.25	0.001987
4046	NNU_01208-RA	1.25	3.67e-06
4311	NNU_09155-RA	1.25	0.008907
4550	NNU_26118-RA	1.25	0.01086
5349	NNU_13395-RA	1.25	8.84e-06
5410	NNU_18809-RA	1.25	9.34e-06
5771	NNU_06857-RA	1.25	9.82e-06
5927	NNU_07263-RA	1.25	7.22e-06
6090	NNU_00218-RA	1.25	6.62e-06
6122	NNU_06294-RA	1.25	2.17e-05
6575	NNU_04373-RA	1.25	3.1e-07
6597	NNU_07007-RA	1.25	3.65e-07
6606	NNU_04151-RA	1.25	1.81e-06
621	NNU_17531-RA	1.24	1.25e-05
636	NNU_03766-RA	1.24	7.65e-05
806	NNU_08730-RA	1.24	2.67e-06
846	NNU_22992-RA	1.24	7.46e-09
1183	NNU_25532-RA	1.24	1.65e-06
1268	NNU_17657-RA	1.24	9.96e-08
1654	NNU_18759-RA	1.24	0.0001589
1911	NNU_16869-RA	1.24	1.78e-06
1916	NNU_14478-RA	1.24	1.56e-05
2073	NNU_17759-RA	1.24	1.97e-09
2104	NNU_23764-RA	1.24	3.8e-07
2145	NNU_20958-RA	1.24	4.2e-08
2671	NNU_15098-RA	1.24	0.004243
2696	NNU_19762-RA	1.24	1.53e-07
2872	NNU_10434-RA	1.24	0.02445
2889	NNU_24054-RA	1.24	0.0005659
3223	NNU_05964-RA	1.24	0.002846
3352	NNU_11938-RA	1.24	4.08e-09
3444	NNU_14721-RA	1.24	1.21e-06
3457	NNU_18121-RA	1.24	2.26e-05
3750	NNU_12309-RA	1.24	0.0004781
3990	NNU_04138-RA	1.24	4.36e-06
4093	NNU_25241-RA	1.24	9.13e-05
4097	NNU_07527-RA	1.24	7.84e-06
4181	NNU_16059-RA	1.24	2.45e-05
4201	NNU_07255-RA	1.24	0.0006042
4854	NNU_05003-RA	1.24	5.31e-05
4946	NNU_26039-RA	1.24	1.52e-06
5055	NNU_17742-RA	1.24	0.0003792
5140	NNU_03043-RA	1.24	1.79e-06
5546	NNU_22790-RA	1.24	0.002596
5676	NNU_07381-RA	1.24	4.56e-10
6274	NNU_10460-RA	1.24	0.001186
6566	NNU_23860-RA	1.24	1.74e-05
6623	NNU_12646-RA	1.24	2.19e-06
330	NNU_21128-RA	1.23	6.55e-05
406	NNU_14081-RA	1.23	5.57e-07
1058	NNU_23806-RA	1.23	5.43e-05
1240	NNU_24625-RA	1.23	0.0001733
1394	NNU_15645-RA	1.23	0.0291
1763	NNU_09112-RA	1.23	1.41e-05
2195	NNU_22980-RA	1.23	2.14e-09
2828	NNU_02996-RA	1.23	3.26e-07
3378	NNU_11712-RA	1.23	0.004699
3588	NNU_11976-RA	1.23	9.25e-07
3797	NNU_20600-RA	1.23	0.04272
4123	NNU_13646-RA	1.23	5.36e-05
4579	NNU_08014-RA	1.23	3.16e-05
4674	NNU_00675-RA	1.23	8.18e-05
5039	NNU_11662-RA	1.23	0.02353
5107	NNU_23013-RA	1.23	1.99e-05
5153	NNU_22191-RA	1.23	0.0002689
5509	NNU_16767-RA	1.23	0.00413
5650	NNU_05933-RA	1.23	7.94e-05
6141	NNU_26559-RA	1.23	1.14e-11
6156	NNU_21718-RA	1.23	0.01576
6224	NNU_06929-RA	1.23	0.001769
6276	NNU_02335-RA	1.23	0.0001361
71	NNU_02698-RA	1.22	8.42e-06
270	NNU_02794-RA	1.22	0.001766
484	NNU_21419-RA	1.22	2.78e-05
599	NNU_14956-RA	1.22	5.08e-05
855	NNU_09803-RA	1.22	0.0002886
874	NNU_00816-RA	1.22	0.006824
902	NNU_11467-RA	1.22	3.59e-08
1100	NNU_02915-RA	1.22	0.003101
1452	NNU_20326-RA	1.22	0.008671
1555	NNU_26151-RA	1.22	9.96e-09
1620	NNU_17774-RA	1.22	1.33e-07
1709	NNU_24837-RA	1.22	1.5e-05
1935	NNU_12686-RA	1.22	8.86e-07
2298	NNU_08198-RA	1.22	1.02e-07
2411	NNU_14240-RA	1.22	9.07e-07
2818	NNU_09645-RA	1.22	9.42e-06
3027	NNU_24880-RA	1.22	0.0002224
3041	NNU_22212-RA	1.22	0.0003702
3099	NNU_14159-RA	1.22	2.22e-07
3126	NNU_08350-RA	1.22	8.2e-10
3332	NNU_19650-RA	1.22	0.000233
3361	NNU_23974-RA	1.22	1.42e-05
3680	NNU_07329-RA	1.22	0.006299
4017	NNU_01867-RA	1.22	4.68e-07
4250	NNU_07055-RA	1.22	2.28e-06
4301	NNU_24310-RA	1.22	7.4e-08
4610	NNU_07499-RA	1.22	0.03899
4720	NNU_16725-RA	1.22	8.29e-09
5109	NNU_19710-RA	1.22	0.0002152
5119	NNU_11971-RA	1.22	7.66e-06
5634	NNU_10907-RA	1.22	3.81e-06
5651	NNU_10344-RA	1.22	0.0001373
6005	NNU_00860-RA	1.22	5.23e-07
6096	NNU_08222-RA	1.22	0.0006406
6134	NNU_10012-RA	1.22	0.03035
6381	NNU_20048-RA	1.22	6.75e-06
6653	NNU_02723-RA	1.22	0.003557
6803	NNU_04927-RA	1.22	4.15e-06
171	NNU_13238-RA	1.21	2.95e-08
226	NNU_03557-RA	1.21	0.0001535
290	NNU_14144-RA	1.21	0.0003059
490	NNU_18725-RA	1.21	6.06e-08
508	NNU_19370-RA	1.21	1.44e-05
778	NNU_06462-RA	1.21	8.35e-07
780	NNU_22196-RA	1.21	4.52e-05
1088	NNU_26056-RA	1.21	1.8e-08
1435	NNU_12640-RA	1.21	3.78e-05
1499	NNU_17465-RA	1.21	0.000239
2338	NNU_05482-RA	1.21	3.09e-08
2544	NNU_06006-RA	1.21	7.72e-07
2878	NNU_18366-RA	1.21	6.01e-05
2971	NNU_01850-RA	1.21	3.39e-05
3203	NNU_03566-RA	1.21	0.0429
3402	NNU_25330-RA	1.21	6.18e-07
3409	NNU_07340-RA	1.21	0.03122
3526	NNU_02744-RA	1.21	7.69e-05
3585	NNU_24797-RA	1.21	0.0009554
3724	NNU_09801-RA	1.21	7.29e-07
3817	NNU_02580-RA	1.21	4.65e-09
4121	NNU_11887-RA	1.21	0.0006395
4128	NNU_05256-RA	1.21	0.003467
4392	NNU_11470-RA	1.21	0.002212
4420	NNU_25014-RA	1.21	2.35e-06
4705	NNU_23093-RA	1.21	2.85e-06
4937	NNU_19343-RA	1.21	0.0003319
5061	NNU_04824-RA	1.21	5.69e-05
5688	NNU_07472-RA	1.21	0.0001305
5773	NNU_13607-RA	1.21	7.95e-07
5817	NNU_05724-RA	1.21	5.16e-07
5824	NNU_20400-RA	1.21	1.39e-05
6154	NNU_12277-RA	1.21	0.0003729
6332	NNU_01065-RA	1.21	0.002799
6536	NNU_09609-RA	1.21	4.18e-05
6625	NNU_21082-RA	1.21	5.47e-07
6818	NNU_15982-RA	1.21	0.0001698
90	NNU_19769-RA	0.83	1.537e-08
204	NNU_09371-RA	0.83	0.02518
302	NNU_04008-RA	0.83	1.752e-05
331	NNU_19897-RA	0.83	5.76e-07
417	NNU_18181-RA	0.83	0.000172
665	NNU_16724-RA	0.83	8.669e-05
705	NNU_18786-RA	0.83	6.981e-05
708	NNU_15996-RA	0.83	7.739e-08
1079	NNU_13191-RA	0.83	0.0009537
1102	NNU_08401-RA	0.83	0.0005914
1241	NNU_06804-RA	0.83	2.619e-08
1271	NNU_18226-RA	0.83	1.341e-08
1359	NNU_15295-RA	0.83	0.0003298
1383	NNU_20895-RA	0.83	2.725e-07
1431	NNU_12510-RA	0.83	2.233e-07
1504	NNU_19195-RA	0.83	3.415e-05
1731	NNU_23077-RA	0.83	3.058e-08
1740	NNU_17158-RA	0.83	3.166e-07
1913	NNU_01622-RA	0.83	8.151e-06
2303	NNU_03548-RA	0.83	0.0005352
2384	NNU_07454-RA	0.83	8.583e-06
2442	NNU_01674-RA	0.83	0.006799
2477	NNU_19852-RA	0.83	4.168e-10
2561	NNU_05170-RA	0.83	0.001041
2822	NNU_15252-RA	0.83	1.514e-05
2895	NNU_05908-RA	0.83	1.063e-08
2985	NNU_23814-RA	0.83	0.04951
3128	NNU_03672-RA	0.83	1.006e-07
3250	NNU_25366-RA	0.83	0.02101
3476	NNU_01032-RA	0.83	0.0008171
3543	NNU_12085-RA	0.83	1.914e-09
3596	NNU_01805-RA	0.83	2.885e-07
3772	NNU_14758-RA	0.83	3.933e-06
3954	NNU_26372-RA	0.83	3.845e-05
4034	NNU_21755-RA	0.83	1.287e-06
4061	NNU_00687-RA	0.83	0.0006809
4078	NNU_00788-RA	0.83	0.0002722
4252	NNU_07167-RA	0.83	5.176e-05
4281	NNU_23168-RA	0.83	2.155e-05
4366	NNU_06264-RA	0.83	0.004165
4465	NNU_25879-RA	0.83	1.414e-05
4621	NNU_18466-RA	0.83	2.13e-05
4783	NNU_06751-RA	0.83	1.092e-06
4868	NNU_17182-RA	0.83	8.761e-06
4870	NNU_02750-RA	0.83	0.000186
4945	NNU_12092-RA	0.83	1.215e-05
5057	NNU_13594-RA	0.83	0.01664
5164	NNU_13461-RA	0.83	0.01033
5168	NNU_06262-RA	0.83	0.007637
5231	NNU_17970-RA	0.83	0.002369
5299	NNU_11089-RA	0.83	5.385e-07
5622	NNU_18337-RA	0.83	4.121e-06
5683	NNU_23465-RA	0.83	1.086e-07
5765	NNU_13859-RA	0.83	1.492e-05
5829	NNU_01505-RA	0.83	0.0005975
5889	NNU_03800-RA	0.83	0.001563
5914	NNU_04142-RA	0.83	9.523e-11
6171	NNU_18846-RA	0.83	4.614e-08
6179	NNU_16041-RA	0.83	0.02149
6299	NNU_08226-RA	0.83	0.001156
6504	NNU_00951-RA	0.83	7.815e-06
6633	NNU_17936-RA	0.83	0.0005937
6676	NNU_19400-RA	0.83	0.0008331
6680	NNU_26458-RA	0.83	1.498e-05
6722	NNU_01172-RA	0.83	1.619e-07
182	NNU_02668-RA	0.82	0.005979
389	NNU_09989-RA	0.82	0.0008114
679	NNU_14998-RA	0.82	0.0003061
912	NNU_01572-RA	0.82	6.13e-05
916	NNU_17390-RA	0.82	3.685e-08
1224	NNU_05138-RA	0.82	1.755e-05
1476	NNU_11545-RA	0.82	0.01729
1512	NNU_01016-RA	0.82	0.001757
1573	NNU_11668-RA	0.82	2.114e-07
1647	NNU_20345-RA	0.82	9.096e-06
1919	NNU_06467-RA	0.82	6.789e-08
2738	NNU_16231-RA	0.82	6.561e-06
2760	NNU_19763-RA	0.82	0.0003515
2776	NNU_18944-RA	0.82	0.0002774
2811	NNU_26102-RA	0.82	1.029e-08
2819	NNU_18171-RA	0.82	0.02393
3142	NNU_22615-RA	0.82	5.143e-05
3422	NNU_08714-RA	0.82	7.899e-05
3451	NNU_25235-RA	0.82	2.657e-08
3462	NNU_02393-RA	0.82	1.389e-07
3692	NNU_00371-RA	0.82	0.001918
3782	NNU_19893-RA	0.82	3.582e-07
3883	NNU_10211-RA	0.82	1.477e-07
3911	NNU_07966-RA	0.82	9.434e-06
4066	NNU_05397-RA	0.82	8.579e-07
4103	NNU_06036-RA	0.82	2.846e-09
4259	NNU_12261-RA	0.82	1.575e-06
4277	NNU_15575-RA	0.82	0.0007371
4442	NNU_26127-RA	0.82	4.874e-07
4493	NNU_06170-RA	0.82	0.0001034
4599	NNU_25594-RA	0.82	1.108e-07
4779	NNU_24900-RA	0.82	0.0001459
4825	NNU_15106-RA	0.82	8.763e-06
5012	NNU_13649-RA	0.82	3.3e-06
5261	NNU_20481-RA	0.82	7.022e-05
5721	NNU_12435-RA	0.82	0.006123
5904	NNU_12627-RA	0.82	5.207e-05
6267	NNU_17236-RA	0.82	4.266e-06
6304	NNU_13454-RA	0.82	3.947e-08
6317	NNU_08680-RA	0.82	0.0004459
6377	NNU_07711-RA	0.82	6.044e-07
6396	NNU_13259-RA	0.82	0.001235
6444	NNU_10070-RA	0.82	0.001147
6467	NNU_00332-RA	0.82	9.713e-07
6791	NNU_08642-RA	0.82	0.000347
67	NNU_23367-RA	0.81	0.000433
110	NNU_00391-RA	0.81	8.489e-06
367	NNU_07945-RA	0.81	9.447e-08
537	NNU_04768-RA	0.81	0.0004696
541	NNU_23250-RA	0.81	1.181e-05
592	NNU_21873-RA	0.81	0.0001355
595	NNU_19846-RA	0.81	0.003204
645	NNU_09851-RA	0.81	6.668e-10
709	NNU_23118-RA	0.81	0.002328
810	NNU_10268-RA	0.81	3.211e-09
1017	NNU_02151-RA	0.81	6.812e-05
1132	NNU_06699-RA	0.81	4.095e-06
1197	NNU_08044-RA	0.81	0.0004668
1334	NNU_04212-RA	0.81	6.024e-05
1344	NNU_12019-RA	0.81	0.0003324
1492	NNU_09448-RA	0.81	0.0001066
1498	NNU_16314-RA	0.81	0.0001331
1875	NNU_18464-RA	0.81	8.015e-06
2203	NNU_05713-RA	0.81	0.0002265
2267	NNU_02899-RA	0.81	0.0003177
2387	NNU_24103-RA	0.81	1.919e-07
2503	NNU_16670-RA	0.81	2.541e-06
2833	NNU_04509-RA	0.81	4.266e-06
3042	NNU_22871-RA	0.81	0.02815
3346	NNU_09435-RA	0.81	0.001168
3480	NNU_01620-RA	0.81	1.207e-09
3583	NNU_04089-RA	0.81	2.38e-06
3756	NNU_06430-RA	0.81	0.0005763
3799	NNU_23610-RA	0.81	1.329e-05
3997	NNU_18252-RA	0.81	1.877e-06
4578	NNU_18878-RA	0.81	0.0002334
4598	NNU_22243-RA	0.81	0.002769
4623	NNU_04002-RA	0.81	0.002256
4785	NNU_02183-RA	0.81	2.876e-09
4812	NNU_16406-RA	0.81	1.804e-08
4893	NNU_02724-RA	0.81	7.03e-06
4936	NNU_03549-RA	0.81	0.0006118
5488	NNU_13184-RA	0.81	8.185e-07
6391	NNU_15429-RA	0.81	1.763e-06
498	NNU_17562-RA	0.8	5.709e-05
608	NNU_17243-RA	0.8	1.398e-05
1145	NNU_19603-RA	0.8	0.00698
1182	NNU_12322-RA	0.8	1.75e-09
1794	NNU_19448-RA	0.8	1.253e-05
1902	NNU_15922-RA	0.8	2.259e-08
2388	NNU_15035-RA	0.8	1.064e-10
2425	NNU_18676-RA	0.8	1.698e-08
2686	NNU_14921-RA	0.8	4.905e-07
2703	NNU_08652-RA	0.8	2.114e-05
2769	NNU_09807-RA	0.8	0.000998
2938	NNU_10255-RA	0.8	4.132e-09
2978	NNU_08884-RA	0.8	1.303e-06
3006	NNU_07590-RA	0.8	0.0009615
3195	NNU_18057-RA	0.8	1.677e-05
3393	NNU_10960-RA	0.8	1.776e-05
3485	NNU_13639-RA	0.8	0.0007028
3590	NNU_22358-RA	0.8	0.01189
3640	NNU_16961-RA	0.8	2.255e-07
3865	NNU_17218-RA	0.8	0.000518
4000	NNU_03550-RA	0.8	9.179e-06
4115	NNU_09848-RA	0.8	2.72e-06
4239	NNU_20538-RA	0.8	1.537e-06
4407	NNU_03475-RA	0.8	1.433e-08
4722	NNU_25347-RA	0.8	3.315e-07
4791	NNU_21795-RA	0.8	1.1e-06
4863	NNU_14903-RA	0.8	0.01396
5297	NNU_11665-RA	0.8	7.321e-06
5313	NNU_18080-RA	0.8	3.653e-05
5460	NNU_08676-RA	0.8	2.153e-06
5464	NNU_15029-RA	0.8	1.736e-07
5494	NNU_19884-RA	0.8	1.328e-05
5531	NNU_13456-RA	0.8	1.065e-05
5579	NNU_17164-RA	0.8	3.491e-09
5627	NNU_10178-RA	0.8	6.775e-08
5740	NNU_19104-RA	0.8	2.15e-05
5742	NNU_24839-RA	0.8	0.01627
5809	NNU_24409-RA	0.8	2.621e-09
6031	NNU_13438-RA	0.8	8.592e-08
6130	NNU_12608-RA	0.8	0.0001366
6379	NNU_10789-RA	0.8	4.99e-12
6516	NNU_25977-RA	0.8	1.764e-06
6668	NNU_05857-RA	0.8	0.0003228
6774	NNU_09316-RA	0.8	5.284e-08
62	NNU_10149-RA	0.79	4.775e-08
98	NNU_10728-RA	0.79	0.000242
238	NNU_00585-RA	0.79	1.952e-06
282	NNU_00324-RA	0.79	6.189e-08
283	NNU_12006-RA	0.79	0.04734
622	NNU_03472-RA	0.79	5.086e-07
658	NNU_09234-RA	0.79	6.479e-07
1161	NNU_22006-RA	0.79	1.822e-09
1336	NNU_20168-RA	0.79	1.508e-09
1353	NNU_10006-RA	0.79	2.889e-08
1797	NNU_08135-RA	0.79	0.0004074
2101	NNU_20555-RA	0.79	1.212e-05
2355	NNU_13097-RA	0.79	0.00074
2702	NNU_26383-RA	0.79	1.778e-06
2885	NNU_26444-RA	0.79	2.706e-05
3315	NNU_08359-RA	0.79	1.12e-05
3529	NNU_16755-RA	0.79	0.005205
3838	NNU_10143-RA	0.79	1.181e-10
4597	NNU_25700-RA	0.79	0.003207
4820	NNU_22946-RA	0.79	0.008202
4951	NNU_16203-RA	0.79	0.009941
4997	NNU_17016-RA	0.79	1.158e-06
5242	NNU_17961-RA	0.79	0.0004608
5409	NNU_12882-RA	0.79	8.217e-07
5482	NNU_21452-RA	0.79	0.003697
5728	NNU_16586-RA	0.79	0.002823
5837	NNU_10903-RA	0.79	0.0003084
6718	NNU_18669-RA	0.79	0.001829
19	NNU_06787-RA	0.78	4.539e-06
371	NNU_10478-RA	0.78	0.002528
895	NNU_09349-RA	0.78	1.453e-08
1012	NNU_00197-RA	0.78	2.85e-06
1329	NNU_04784-RA	0.78	1.19e-05
1490	NNU_24204-RA	0.78	1.041e-08
1644	NNU_01590-RA	0.78	0.001602
1735	NNU_13024-RA	0.78	0.0003672
1914	NNU_22144-RA	0.78	0.0001577
2188	NNU_24693-RA	0.78	2.29e-05
2215	NNU_13090-RA	0.78	3.691e-06
2654	NNU_05398-RA	0.78	0.01136
2935	NNU_14548-RA	0.78	0.0008183
3231	NNU_06486-RA	0.78	6.979e-08
3388	NNU_05044-RA	0.78	1.532e-06
4494	NNU_01692-RA	0.78	0.0001204
4867	NNU_21309-RA	0.78	1.889e-07
6016	NNU_21582-RA	0.78	2.622e-06
6237	NNU_06887-RA	0.78	3.776e-08
6337	NNU_12410-RA	0.78	2.09e-07
6746	NNU_21752-RA	0.78	3.049e-07
6787	NNU_25543-RA	0.78	0.0007801
439	NNU_13762-RA	0.77	0.0001865
501	NNU_16960-RA	0.77	2.077e-06
1010	NNU_02800-RA	0.77	1.392e-07
2339	NNU_04153-RA	0.77	1.431e-05
2341	NNU_03529-RA	0.77	5.391e-08
2348	NNU_21411-RA	0.77	1.122e-09
2405	NNU_20621-RA	0.77	0.0008314
2459	NNU_17219-RA	0.77	3.507e-08
3026	NNU_22721-RA	0.77	3.58e-06
3139	NNU_11519-RA	0.77	8.584e-11
3207	NNU_22902-RA	0.77	1.416e-06
3233	NNU_17479-RA	0.77	0.0006256
3253	NNU_23937-RA	0.77	1.268e-05
3464	NNU_19030-RA	0.77	1.615e-05
3473	NNU_00940-RA	0.77	1.068e-07
3818	NNU_24706-RA	0.77	0.01966
3890	NNU_10773-RA	0.77	4.293e-05
4646	NNU_11979-RA	0.77	6.971e-06
4771	NNU_13833-RA	0.77	0.04832
5068	NNU_08196-RA	0.77	6.151e-06
5536	NNU_22556-RA	0.77	3.965e-08
5873	NNU_07002-RA	0.77	2.031e-06
6070	NNU_17903-RA	0.77	0.001417
480	NNU_12948-RA	0.76	7.779e-07
794	NNU_05367-RA	0.76	0.0001698
1143	NNU_20134-RA	0.76	3.86e-07
1305	NNU_06254-RA	0.76	1.829e-06
2045	NNU_04707-RA	0.76	0.007547
2882	NNU_09596-RA	0.76	2.297e-08
3628	NNU_05868-RA	0.76	3.171e-06
3983	NNU_05726-RA	0.76	0.0004536
3992	NNU_08593-RA	0.76	2.947e-09
4941	NNU_09006-RA	0.76	4.274e-05
5283	NNU_20259-RA	0.76	0.006188
5440	NNU_09849-RA	0.76	3.253e-05
6116	NNU_12934-RA	0.76	6.163e-09
6307	NNU_18403-RA	0.76	0.004908
6456	NNU_10205-RA	0.76	7.885e-11
210	NNU_20261-RA	0.75	7.495e-10
521	NNU_07603-RA	0.75	0.001456
1523	NNU_00813-RA	0.75	1.78e-06
2673	NNU_00950-RA	0.75	8.947e-05
2946	NNU_06891-RA	0.75	1.887e-07
3271	NNU_13376-RA	0.75	1.043e-08
3377	NNU_14084-RA	0.75	5.498e-09
3521	NNU_11787-RA	0.75	2.335e-09
4029	NNU_16434-RA	0.75	0.01606
4076	NNU_23854-RA	0.75	2.127e-09
4421	NNU_11137-RA	0.75	0.0001206
5043	NNU_04141-RA	0.75	3.224e-07
5076	NNU_13972-RA	0.75	3.11e-07
5342	NNU_23243-RA	0.75	0.0002049
5555	NNU_06632-RA	0.75	3.698e-07
5862	NNU_02255-RA	0.75	1.602e-08
6051	NNU_15122-RA	0.75	5.894e-08
6139	NNU_20862-RA	0.75	1.316e-06
6438	NNU_21530-RA	0.75	0.0002251
174	NNU_09317-RA	0.74	0.01003
593	NNU_11034-RA	0.74	0.0005153
844	NNU_15167-RA	0.74	2.156e-05
1337	NNU_23564-RA	0.74	0.02406
1357	NNU_16877-RA	0.74	5.569e-07
1716	NNU_19570-RA	0.74	5.047e-07
1768	NNU_07247-RA	0.74	0.0001697
2292	NNU_15758-RA	0.74	5.669e-06
2596	NNU_04956-RA	0.74	1.153e-07
3248	NNU_09790-RA	0.74	0.002686
3614	NNU_14656-RA	0.74	3.644e-08
3791	NNU_19745-RA	0.74	0.01532
3999	NNU_09103-RA	0.74	0.001724
4959	NNU_16735-RA	0.74	2.498e-06
4977	NNU_22182-RA	0.74	2.515e-06
5930	NNU_07068-RA	0.74	1.022e-08
6234	NNU_21371-RA	0.74	1.328e-06
6583	NNU_15764-RA	0.74	0.01892
6628	NNU_10011-RA	0.74	2.234e-06
570	NNU_19801-RA	0.73	1.999e-07
1134	NNU_20298-RA	0.73	4.932e-08
1166	NNU_03245-RA	0.73	0.001421
1223	NNU_10032-RA	0.73	1.027e-07
1444	NNU_01188-RA	0.73	8.301e-12
1546	NNU_21806-RA	0.73	1.705e-05
1692	NNU_06681-RA	0.73	6.718e-06
2225	NNU_20422-RA	0.73	9.919e-11
3100	NNU_26596-RA	0.73	0.0002896
3694	NNU_13807-RA	0.73	5.759e-06
4234	NNU_14777-RA	0.73	1.361e-09
4335	NNU_18312-RA	0.73	0.0005876
4361	NNU_16843-RA	0.73	2.151e-07
4464	NNU_14061-RA	0.73	1.791e-06
5820	NNU_11763-RA	0.73	6.7e-06
5886	NNU_02421-RA	0.73	1.264e-06
6543	NNU_20825-RA	0.73	3.841e-06
6621	NNU_22005-RA	0.73	2.805e-09
6801	NNU_15495-RA	0.73	7.183e-05
221	NNU_14065-RA	0.72	0.001646
435	NNU_05069-RA	0.72	3.352e-05
1874	NNU_25382-RA	0.72	3.869e-10
4043	NNU_07712-RA	0.72	9.579e-06
5727	NNU_12164-RA	0.72	1.257e-06
281	NNU_05320-RA	0.71	1.566e-07
1302	NNU_04348-RA	0.71	1.185e-07
2579	NNU_03338-RA	0.71	1.148e-06
3053	NNU_18517-RA	0.71	3.299e-07
3062	NNU_14076-RA	0.71	1.048e-10
3294	NNU_09608-RA	0.71	1.294e-07
3387	NNU_01938-RA	0.71	1.364e-08
3974	NNU_08859-RA	0.71	5.499e-07
5324	NNU_11555-RA	0.71	1.278e-06
1181	NNU_04200-RA	0.7	2.421e-08
1284	NNU_25886-RA	0.7	0.0001187
1418	NNU_14523-RA	0.7	3.912e-06
1685	NNU_23975-RA	0.7	9.025e-12
1904	NNU_08430-RA	0.7	3.51e-08
2108	NNU_22844-RA	0.7	2.803e-08
3267	NNU_25964-RA	0.7	6.474e-06
4605	NNU_20979-RA	0.7	8.268e-08
5268	NNU_07057-RA	0.7	1.069e-08
54	NNU_20006-RA	0.69	0.0007327
1403	NNU_23304-RA	0.69	0.01778
3833	NNU_11306-RA	0.69	4.148e-10
4067	NNU_03165-RA	0.69	6.975e-05
4503	NNU_05993-RA	0.69	0.001764
5777	NNU_11159-RA	0.69	5.968e-08
6594	NNU_10082-RA	0.69	3.912e-08
80	NNU_05549-RA	0.68	0.0221
88	NNU_13328-RA	0.68	3.989e-06
728	NNU_18506-RA	0.68	0.001156
1199	NNU_06843-RA	0.68	3.695e-13
6298	NNU_23904-RA	0.68	4.845e-08
285	NNU_05299-RA	0.67	6.126e-08
334	NNU_03274-RA	0.67	0.0005898
720	NNU_01925-RA	0.67	5.771e-08
771	NNU_06947-RA	0.67	0.008987
2028	NNU_25803-RA	0.67	4.046e-07
2068	NNU_09456-RA	0.67	0.0001764
4286	NNU_22894-RA	0.67	4.127e-05
727	NNU_21751-RA	0.66	9.476e-12
3743	NNU_05699-RA	0.66	2.424e-06
5042	NNU_17664-RA	0.66	3.814e-08
5098	NNU_22419-RA	0.66	9.362e-08
6644	NNU_22480-RA	0.66	8.007e-10
2135	NNU_07628-RA	0.65	1.319e-07
2192	NNU_02215-RA	0.65	1.526e-09
2622	NNU_18837-RA	0.65	2.082e-07
4481	NNU_22714-RA	0.64	3.375e-08
5090	NNU_05318-RA	0.64	8.182e-08
5448	NNU_07398-RA	0.64	5.92e-05
5602	NNU_01828-RA	0.64	0.0001139
6615	NNU_21154-RA	0.64	1.004e-05
1860	NNU_16854-RA	0.63	5.659e-08
2041	NNU_23365-RA	0.63	8.451e-08
3458	NNU_25178-RA	0.63	1.136e-09
3492	NNU_22334-RA	0.63	1.046e-08
4107	NNU_14437-RA	0.63	5.754e-09
6386	NNU_14304-RA	0.63	2.123e-09
811	NNU_15362-RA	0.62	2.463e-11
2768	NNU_07875-RA	0.62	1.317e-10
5502	NNU_17482-RA	0.62	1.304e-09
5883	NNU_00676-RA	0.62	6.862e-06
1863	NNU_19414-RA	0.61	2.184e-11
2146	NNU_03172-RA	0.61	6.043e-10
4773	NNU_16936-RA	0.61	5.104e-08
5514	NNU_17972-RA	0.61	9.658e-06
6046	NNU_14382-RA	0.61	0.000378
6416	NNU_03166-RA	0.61	3.253e-10
1231	NNU_01039-RA	0.6	1.695e-06
3508	NNU_20270-RA	0.6	0.01379
6052	NNU_11147-RA	0.6	4.666e-07
3515	NNU_20597-RA	0.59	8.829e-08
268	NNU_15271-RA	0.58	2.922e-10
2418	NNU_18831-RA	0.58	8.507e-08
2589	NNU_21838-RA	0.58	0.001999
3082	NNU_15418-RA	0.58	4.14e-08
2434	NNU_21924-RA	0.57	0.0004617
6020	NNU_15801-RA	0.57	1.686e-08
1659	NNU_07934-RA	0.56	2.537e-09
5934	NNU_11709-RA	0.56	3.489e-08
6519	NNU_08029-RA	0.56	1.561e-07
5088	NNU_21372-RA	0.55	3.762e-13
5542	NNU_25072-RA	0.55	1.309e-06
6358	NNU_04050-RA	0.55	1.078e-09
814	NNU_24222-RA	0.54	3.214e-09
704	NNU_23881-RA	0.52	3.389e-10
2373	NNU_03237-RA	0.5	4.404e-05
2756	NNU_26463-RA	0.5	3.284e-06
2524	NNU_02934-RA	0.48	4.212e-09
3737	NNU_08983-RA	0.47	4.015e-11
4934	NNU_11141-RA	0.46	2.726e-08
5861	NNU_19269-RA	0.46	6.56e-11
86	NNU_07777-RA	0.41	5.808e-08

## Sheet: Table S4
Table S4 DEPs and DEGs with the same trend and opposite trend
NO.	Protein ID	Protein Ratio(CP/FP_pro)	Protein Sig	DEPs	Gene ID	Gene Ratio(CP/FP)	Gene Sig	DEGs
12	NNU_14527-RA	1.31	*	+	NNU_14527	4.03562	0	+
62	NNU_10149-RA	0.79	*	-	NNU_10149	-1.6454	7.31383e-266	-
84	NNU_26321-RA	1.3	*	+	NNU_26321	5.40468	0	+
88	NNU_13328-RA	0.68	*	-	NNU_13328	-3.07349	0	-
108	NNU_01774-RA	1.34	*	+	NNU_01774	3.70936	0	+
218	NNU_01788-RA	1.38	*	+	NNU_01788	1.17237	1.41028e-45	+
252	NNU_10126-RA	1.45	*	+	NNU_10126	2.99295	0	+
376	NNU_22456-RA	1.38	*	+	NNU_22456	6.43357	0	+
389	NNU_09989-RA	0.82	*	-	NNU_09989	-1.12102	1.44187e-06	-
390	NNU_19063-RA	1.69	*	+	NNU_19063	3.62071	1.36661e-56	+
417	NNU_18181-RA	0.83	*	-	NNU_18181	-2.05985	5.74865e-111	-
442	NNU_19408-RA	1.53	*	+	NNU_19408	4.6664	1.49637e-272	+
447	NNU_09403-RA	1.72	*	+	NNU_09403	1.07112	1.29278e-07	+
517	NNU_18395-RA	1.29	*	+	NNU_18395	2.76913	2.20138e-06	+
528	NNU_25482-RA	1.26	*	+	NNU_25482	1.21675	5.5547e-84	+
550	NNU_26669-RA	1.27	*	+	NNU_26669	4.83943	2.03935e-109	+
556	NNU_22367-RA	1.28	*	+	NNU_22367	8.13542	5.23949e-170	+
570	NNU_19801-RA	0.73	*	-	NNU_19801	-3.34316	6.41664e-206	-
593	NNU_11034-RA	0.74	*	-	NNU_11034	-1.28775	2.28737e-62	-
621	NNU_17531-RA	1.24	*	+	NNU_17531	2.34121	3.49109e-34	+
708	NNU_15996-RA	0.83	*	-	NNU_15996	-5.06904	1.03714e-05	-
741	NNU_21784-RA	2.1	*	+	NNU_21784	6.08883	1.57383e-22	+
804	NNU_06302-RA	1.45	*	+	NNU_06302	2.69512	0	+
809	NNU_21183-RA	1.56	*	+	NNU_21183	1.10549	1.797e-104	+
814	NNU_24222-RA	0.54	*	-	NNU_24222	-1.29007	2.49292e-76	-
851	NNU_17101-RA	1.28	*	+	NNU_17101	3.70114	0	+
895	NNU_09349-RA	0.78	*	-	NNU_09349	-1.08237	9.31147e-59	-
902	NNU_11467-RA	1.22	*	+	NNU_11467	1.59951	0	+
916	NNU_17390-RA	0.82	*	-	NNU_17390	-3.11743	0	-
930	NNU_12272-RA	1.59	*	+	NNU_12272	2.07291	4.02969e-52	+
974	NNU_23481-RA	1.41	*	+	NNU_23481	3.89326	1.43563e-10	+
1042	NNU_07912-RA	1.44	*	+	NNU_07912	1.01241	0	+
1143	NNU_20134-RA	0.76	*	-	NNU_20134	-1.42775	0	-
1145	NNU_19603-RA	0.8	*	-	NNU_19603	-1.07977	3.18308e-14	-
1147	NNU_11707-RA	1.54	*	+	NNU_11707	1.14569	1.58693e-13	+
1160	NNU_12079-RA	1.33	*	+	NNU_12079	1.69451	5.62859e-148	+
1183	NNU_25532-RA	1.24	*	+	NNU_25532	2.02489	1.65888e-71	+
1199	NNU_06843-RA	0.68	*	-	NNU_06843	-2.24732	1.42422e-275	-
1241	NNU_06804-RA	0.83	*	-	NNU_06804	-1.46581	6.02304e-88	-
1250	NNU_14681-RA	1.51	*	+	NNU_14681	4.05294	2.80881e-07	+
1270	NNU_02180-RA	1.57	*	+	NNU_02180	7.12041	2.24402e-180	+
1283	NNU_15671-RA	1.98	*	+	NNU_15671	3.95744	0	+
1320	NNU_01046-RA	1.28	*	+	NNU_01046	6.3184	2.04189e-158	+
1322	NNU_23381-RA	1.4	*	+	NNU_23381	4.3863	0	+
1331	NNU_00029-RA	1.94	*	+	NNU_00029	1.32485	6.15172e-43	+
1359	NNU_15295-RA	0.83	*	-	NNU_15295	-4.02637	4.69881e-17	-
1382	NNU_08586-RA	1.36	*	+	NNU_08586	4.85781	0	+
1490	NNU_24204-RA	0.78	*	-	NNU_24204	-1.17988	1.57421e-111	-
1555	NNU_26151-RA	1.22	*	+	NNU_26151	2.69696	0	+
1593	NNU_15022-RA	1.39	*	+	NNU_15022	1.38569	1.49296e-154	+
1611	NNU_09514-RA	1.37	*	+	NNU_09514	1.54218	1.81173e-13	+
1685	NNU_23975-RA	0.7	*	-	NNU_23975	-1.52528	4.24663e-282	-
1709	NNU_24837-RA	1.22	*	+	NNU_24837	9.39386	2.48369e-33	+
1718	NNU_20224-RA	1.95	*	+	NNU_20224	1.30894	4.33901e-283	+
1849	NNU_17738-RA	1.27	*	+	NNU_17738	1.12478	4.66863e-81	+
1852	NNU_08384-RA	1.32	*	+	NNU_08384	5.62105	9.87241e-111	+
1863	NNU_19414-RA	0.61	*	-	NNU_19414	-9.43431	0	-
1869	NNU_11788-RA	1.41	*	+	NNU_11788	3.86444	0	+
1911	NNU_16869-RA	1.24	*	+	NNU_16869	6.20201	1.42715e-30	+
1916	NNU_14478-RA	1.24	*	+	NNU_14478	8.40812	5.37056e-33	+
1923	NNU_01997-RA	1.27	*	+	NNU_01997	3.00779	7.38159e-28	+
1935	NNU_12686-RA	1.22	*	+	NNU_12686	9.65433	1.7432e-35	+
1949	NNU_11585-RA	1.67	*	+	NNU_11585	3.25807	2.02923e-35	+
2041	NNU_23365-RA	0.63	*	-	NNU_23365	-4.80394	0	-
2054	NNU_24987-RA	1.75	*	+	NNU_24987	6.62038	3.71311e-19	+
2068	NNU_09456-RA	0.67	*	-	NNU_09456	-0.99982	1.61956e-23	-
2078	NNU_24457-RA	1.31	*	+	NNU_24457	4.23802	5.75447e-266	+
2101	NNU_20555-RA	0.79	*	-	NNU_20555	-3.34778	0.000290705	-
2181	NNU_00376-RA	1.51	*	+	NNU_00376	1.21044	5.74381e-32	+
2200	NNU_02186-RA	1.63	*	+	NNU_02186	1.34836	1.91573e-75	+
2216	NNU_11593-RA	1.48	*	+	NNU_11593	6.73117	4.48262e-46	+
2252	NNU_06496-RA	1.62	*	+	NNU_06496	3.81479	0	+
2259	NNU_01576-RA	1.42	*	+	NNU_01576	3.25957	0	+
2278	NNU_22277-RA	1.27	*	+	NNU_22277	4.75111	6.90632e-46	+
2295	NNU_08289-RA	1.32	*	+	NNU_08289	2.32884	1.1989e-15	+
2318	NNU_13703-RA	1.31	*	+	NNU_13703	2.20187	0	+
2355	NNU_13097-RA	0.79	*	-	NNU_13097	-1.25445	2.60964e-30	-
2411	NNU_14240-RA	1.22	*	+	NNU_14240	3.87538	0	+
2467	NNU_13918-RA	1.26	*	+	NNU_13918	4.98505	2.48098e-32	+
2477	NNU_19852-RA	0.83	*	-	NNU_19852	-3.09312	0	-
2479	NNU_18322-RA	4.49	*	+	NNU_18322	2.30785	2.27118e-97	+
2524	NNU_02934-RA	0.48	*	-	NNU_02934	-2.92008	3.55441e-194	-
2577	NNU_02879-RA	1.63	*	+	NNU_02879	7.22847	3.86138e-100	+
2608	NNU_09687-RA	1.36	*	+	NNU_09687	5.77427	6.76097e-11	+
2648	NNU_08016-RA	1.27	*	+	NNU_08016	1.04712	8.26821e-33	+
2671	NNU_15098-RA	1.24	*	+	NNU_15098	2.16299	1.88746e-26	+
2696	NNU_19762-RA	1.24	*	+	NNU_19762	1.20415	4.12772e-53	+
2752	NNU_05129-RA	1.63	*	+	NNU_05129	1.54979	3.01398e-280	+
2791	NNU_15776-RA	1.31	*	+	NNU_15776	9.03421	8.86206e-39	+
2828	NNU_02996-RA	1.23	*	+	NNU_02996	1.06198	2.79708e-63	+
2882	NNU_09596-RA	0.76	*	-	NNU_09596	-2.44495	0	-
2925	NNU_18975-RA	1.35	*	+	NNU_18975	3.93724	6.49584e-199	+
3027	NNU_24880-RA	1.22	*	+	NNU_24880	1.87842	3.507e-225	+
3082	NNU_15418-RA	0.58	*	-	NNU_15418	-1.04894	1.21125e-32	-
3203	NNU_03566-RA	1.21	*	+	NNU_03566	1.95359	0.00122154	+
3216	NNU_26035-RA	1.57	*	+	NNU_26035	1.71695	9.53077e-258	+
3222	NNU_11580-RA	2.08	*	+	NNU_11580	1.2386	8.91259e-52	+
3253	NNU_23937-RA	0.77	*	-	NNU_23937	-1.13508	1.21204e-116	-
3271	NNU_13376-RA	0.75	*	-	NNU_13376	-1.08678	6.71514e-115	-
3294	NNU_09608-RA	0.71	*	-	NNU_09608	-1.94714	3.63265e-32	-
3306	NNU_11557-RA	1.39	*	+	NNU_11557	7.26571	0	+
3307	NNU_24404-RA	1.34	*	+	NNU_24404	7.53367	1.3861e-70	+
3333	NNU_05866-RA	1.74	*	+	NNU_05866	1.51295	5.14629e-11	+
3346	NNU_09435-RA	0.81	*	-	NNU_09435	-1.07007	1.66983e-31	-
3363	NNU_15278-RA	1.78	*	+	NNU_15278	2.1233	3.61522e-12	+
3388	NNU_05044-RA	0.78	*	-	NNU_05044	-1.17464	3.22334e-94	-
3391	NNU_06315-RA	1.33	*	+	NNU_06315	6.90781	1.44644e-177	+
3413	NNU_10230-RA	1.25	*	+	NNU_10230	1.68647	0	+
3508	NNU_20270-RA	0.6	*	-	NNU_20270	-1.0418	1.14961e-10	-
3509	NNU_23898-RA	1.26	*	+	NNU_23898	2.84863	6.69764e-152	+
3526	NNU_02744-RA	1.21	*	+	NNU_02744	1.18936	1.43003e-153	+
3562	NNU_17036-RA	1.48	*	+	NNU_17036	2.06817	1.22767e-05	+
3610	NNU_15555-RA	1.28	*	+	NNU_15555	1.86465	2.46816e-78	+
3680	NNU_07329-RA	1.22	*	+	NNU_07329	2.14747	1.8659e-09	+
3691	NNU_25850-RA	1.84	*	+	NNU_25850	8.81537	6.58067e-21	+
3737	NNU_08983-RA	0.47	*	-	NNU_08983	-3.77347	0	-
3739	NNU_11644-RA	1.98	*	+	NNU_11644	3.0296	4.38477e-63	+
3743	NNU_05699-RA	0.66	*	-	NNU_05699	-1.55049	1.90785e-124	-
3772	NNU_14758-RA	0.83	*	-	NNU_14758	-6.48351	0	-
3800	NNU_03128-RA	1.6	*	+	NNU_03128	5.97513	0	+
3858	NNU_02159-RA	1.47	*	+	NNU_02159	1.36918	1.12584e-20	+
3873	NNU_05333-RA	1.75	*	+	NNU_05333	1.49927	0	+
3874	NNU_12990-RA	1.47	*	+	NNU_12990	3.03351	7.56093e-67	+
3875	NNU_26435-RA	1.31	*	+	NNU_26435	1.35347	0.00695161	+
3915	NNU_13916-RA	1.28	*	+	NNU_13916	2.36875	3.19541e-209	+
3919	NNU_08036-RA	1.57	*	+	NNU_08036	2.50821	0.0456564	+
3955	NNU_07892-RA	1.26	*	+	NNU_07892	1.21524	1.25146e-11	+
3962	NNU_24708-RA	1.91	*	+	NNU_24708	1.96776	1.21929e-115	+
3979	NNU_10991-RA	1.31	*	+	NNU_10991	5.17654	0	+
3985	NNU_05092-RA	1.37	*	+	NNU_05092	2.79516	2.63135e-15	+
3990	NNU_04138-RA	1.24	*	+	NNU_04138	7.22123	3.50251e-54	+
4014	NNU_15643-RA	1.31	*	+	NNU_15643	1.14517	3.97593e-40	+
4017	NNU_01867-RA	1.22	*	+	NNU_01867	5.29227	0	+
4043	NNU_07712-RA	0.72	*	-	NNU_07712	-1.15913	9.9023e-83	-
4055	NNU_17536-RA	1.48	*	+	NNU_17536	5.22582	6.43566e-48	+
4059	NNU_10311-RA	1.41	*	+	NNU_10311	8.79003	1.21759e-130	+
4093	NNU_25241-RA	1.24	*	+	NNU_25241	1.67954	3.17234e-09	+
4097	NNU_07527-RA	1.24	*	+	NNU_07527	1.53333	3.99478e-31	+
4107	NNU_14437-RA	0.63	*	-	NNU_14437	-4.36784	1.46488e-118	-
4123	NNU_13646-RA	1.23	*	+	NNU_13646	2.88899	6.32791e-62	+
4247	NNU_01873-RA	2.02	*	+	NNU_01873	2.26736	4.60337e-37	+
4250	NNU_07055-RA	1.22	*	+	NNU_07055	1.03432	7.17317e-14	+
4301	NNU_24310-RA	1.22	*	+	NNU_24310	1.79077	4.86154e-129	+
4311	NNU_09155-RA	1.25	*	+	NNU_09155	1.4404	1.82702e-14	+
4318	NNU_24012-RA	1.58	*	+	NNU_24012	1.66163	4.95949e-50	+
4380	NNU_05884-RA	1.29	*	+	NNU_05884	1.59627	0	+
4420	NNU_25014-RA	1.21	*	+	NNU_25014	2.97427	2.68037e-29	+
4444	NNU_08312-RA	1.27	*	+	NNU_08312	1.21174	1.15586e-192	+
4472	NNU_09913-RA	1.92	*	+	NNU_09913	1.49959	3.14168e-05	+
4481	NNU_22714-RA	0.64	*	-	NNU_22714	-5.55411	1.54024e-172	-
4493	NNU_06170-RA	0.82	*	-	NNU_06170	-1.70543	7.23526e-128	-
4527	NNU_10554-RA	1.54	*	+	NNU_10554	1.57938	2.56986e-149	+
4553	NNU_13660-RA	1.78	*	+	NNU_13660	2.11012	1.35604e-181	+
4554	NNU_20365-RA	1.4	*	+	NNU_20365	3.7715	0	+
4700	NNU_02538-RA	2.14	*	+	NNU_02538	1.32796	2.38111e-274	+
4715	NNU_17216-RA	1.29	*	+	NNU_17216	4.57372	1.06717e-27	+
4747	NNU_26202-RA	1.31	*	+	NNU_26202	1.1348	1.20094e-92	+
4779	NNU_24900-RA	0.82	*	-	NNU_24900	-1.12963	1.06896e-64	-
4822	NNU_07534-RA	1.4	*	+	NNU_07534	1.04595	1.0533e-16	+
4852	NNU_05011-RA	1.99	*	+	NNU_05011	1.65739	1.01358e-239	+
4952	NNU_21460-RA	1.26	*	+	NNU_21460	1.13003	2.21006e-34	+
4997	NNU_17016-RA	0.79	*	-	NNU_17016	-1.26961	4.43529e-172	-
5016	NNU_16368-RA	2.72	*	+	NNU_16368	4.47396	1.44006e-58	+
5039	NNU_11662-RA	1.23	*	+	NNU_11662	4.03453	0	+
5064	NNU_06154-RA	1.43	*	+	NNU_06154	5.12598	1.41656e-58	+
5076	NNU_13972-RA	0.75	*	-	NNU_13972	-8.5114	3.57759e-257	-
5177	NNU_03313-RA	1.35	*	+	NNU_03313	1.60535	8.78338e-121	+
5211	NNU_04306-RA	1.29	*	+	NNU_04306	2.10696	1.70755e-172	+
5232	NNU_05066-RA	1.49	*	+	NNU_05066	6.6607	8.14102e-176	+
5248	NNU_01102-RA	1.28	*	+	NNU_01102	1.09952	5.71789e-170	+
5261	NNU_20481-RA	0.82	*	-	NNU_20481	-1.20163	1.55003e-149	-
5302	NNU_18785-RA	1.27	*	+	NNU_18785	1.63796	0	+
5454	NNU_00065-RA	1.26	*	+	NNU_00065	1.20016	8.73199e-17	+
5464	NNU_15029-RA	0.8	*	-	NNU_15029	-6.38737	0	-
5482	NNU_21452-RA	0.79	*	-	NNU_21452	-1.1277	2.84709e-16	-
5536	NNU_22556-RA	0.77	*	-	NNU_22556	-2.96745	0	-
5546	NNU_22790-RA	1.24	*	+	NNU_22790	2.24105	1.84536e-51	+
5579	NNU_17164-RA	0.8	*	-	NNU_17164	-1.70329	0	-
5602	NNU_01828-RA	0.64	*	-	NNU_01828	-1.14392	3.42001e-49	-
5609	NNU_16860-RA	1.43	*	+	NNU_16860	1.99992	0	+
5644	NNU_01512-RA	1.89	*	+	NNU_01512	8.28951	0	+
5674	NNU_08954-RA	1.36	*	+	NNU_08954	4.62915	3.47702e-50	+
5835	NNU_02751-RA	1.31	*	+	NNU_02751	9.2049	1.15501e-243	+
5859	NNU_17814-RA	1.49	*	+	NNU_17814	1.1778	8.36519e-80	+
5877	NNU_18258-RA	1.26	*	+	NNU_18258	2.41128	0	+
5886	NNU_02421-RA	0.73	*	-	NNU_02421	-1.5249	6.42662e-68	-
5917	NNU_03687-RA	1.28	*	+	NNU_03687	2.24036	1.61557e-65	+
5934	NNU_11709-RA	0.56	*	-	NNU_11709	-8.64303	0	-
5960	NNU_03781-RA	1.3	*	+	NNU_03781	2.06852	0	+
6016	NNU_21582-RA	0.78	*	-	NNU_21582	-1.67818	1.38399e-142	-
6032	NNU_04126-RA	1.26	*	+	NNU_04126	5.80676	2.63114e-209	+
6051	NNU_15122-RA	0.75	*	-	NNU_15122	-1.15941	8.14232e-34	-
6088	NNU_23524-RA	1.5	*	+	NNU_23524	3.93489	0.00186293	+
6093	NNU_26357-RA	1.26	*	+	NNU_26357	3.29585	2.17825e-28	+
6098	NNU_17796-RA	1.35	*	+	NNU_17796	1.68182	2.98966e-147	+
6105	NNU_15912-RA	2.16	*	+	NNU_15912	1.15433	2.58852e-69	+
6215	NNU_06152-RA	1.61	*	+	NNU_06152	9.82165	2.98828e-106	+
6230	NNU_02876-RA	2.3	*	+	NNU_02876	4.33283	0	+
6239	NNU_23597-RA	1.27	*	+	NNU_23597	5.39248	0	+
6255	NNU_00248-RA	1.6	*	+	NNU_00248	3.27285	7.47041e-34	+
6257	NNU_09134-RA	1.27	*	+	NNU_09134	3.85028	0.000231021	+
6298	NNU_23904-RA	0.68	*	-	NNU_23904	-1.11593	5.58852e-32	-
6332	NNU_01065-RA	1.21	*	+	NNU_01065	1.79498	1.68391e-93	+
6352	NNU_12875-RA	1.86	*	+	NNU_12875	6.60505	5.97421e-19	+
6358	NNU_04050-RA	0.55	*	-	NNU_04050	-3.56714	4.25228e-17	-
6381	NNU_20048-RA	1.22	*	+	NNU_20048	5.49687	4.86737e-161	+
6386	NNU_14304-RA	0.63	*	-	NNU_14304	-1.41067	1.9126e-71	-
6472	NNU_02520-RA	1.54	*	+	NNU_02520	6.40964	0	+
6543	NNU_20825-RA	0.73	*	-	NNU_20825	-2.66024	0	-
6651	NNU_22408-RA	1.47	*	+	NNU_22408	4.99889	0.0011793	+
6679	NNU_01405-RA	1.27	*	+	NNU_01405	1.45112	3.50138e-212	+
6678	NNU_25463-RA	1.66	*	+	NNU_25463	1.11055	0.00666215	+
6699	NNU_23633-RA	1.31	*	+	NNU_23633	3.83366	0	+
19	NNU_06787-RA	0.78	*	-	NNU_06787	6.20751	1.79672e-34	+
24	NNU_20835-RA	1.57	*	+	NNU_20835	-1.74609	1.8047e-210	-
53	NNU_07909-RA	1.29	*	+	NNU_07909	-2.03438	1.0307e-23	-
80	NNU_05549-RA	0.68	*	-	NNU_05549	6.42586	9.71356e-99	+
86	NNU_07777-RA	0.41	*	-	NNU_07777	2.20027	8.11893e-98	+
89	NNU_22614-RA	1.46	*	+	NNU_22614	-2.20311	3.06918e-103	-
110	NNU_00391-RA	0.81	*	-	NNU_00391	1.36651	0.000140415	+
174	NNU_09317-RA	0.74	*	-	NNU_09317	1.68855	2.84858e-104	+
190	NNU_02211-RA	1.58	*	+	NNU_02211	-1.63213	0	-
268	NNU_15271-RA	0.58	*	-	NNU_15271	3.30496	0	+
302	NNU_04008-RA	0.83	*	-	NNU_04008	2.26992	2.13075e-67	+
311	NNU_02765-RA	1.53	*	+	NNU_02765	-2.42884	0	-
324	NNU_21085-RA	1.29	*	+	NNU_21085	-1.7582	4.21871e-64	-
331	NNU_19897-RA	0.83	*	-	NNU_19897	1.58322	7.61852e-92	+
334	NNU_03274-RA	0.67	*	-	NNU_03274	4.39778	1.98029e-33	+
367	NNU_07945-RA	0.81	*	-	NNU_07945	2.6532	3.71809e-07	+
397	NNU_20467-RA	1.39	*	+	NNU_20467	-3.51096	0	-
406	NNU_14081-RA	1.23	*	+	NNU_14081	-3.43976	0	-
467	NNU_08415-RA	1.49	*	+	NNU_08415	-3.37595	0	-
498	NNU_17562-RA	0.8	*	-	NNU_17562	1.27688	2.0001e-25	+
508	NNU_19370-RA	1.21	*	+	NNU_19370	-1.04694	1.1189e-22	-
568	NNU_02773-RA	1.26	*	+	NNU_02773	-1.24214	9.70656e-168	-
622	NNU_03472-RA	0.79	*	-	NNU_03472	1.08341	1.54108e-33	+
636	NNU_03766-RA	1.24	*	+	NNU_03766	-1.99908	1.54911e-74	-
645	NNU_09851-RA	0.81	*	-	NNU_09851	1.08306	2.48904e-135	+
658	NNU_09234-RA	0.79	*	-	NNU_09234	1.64602	1.15739e-10	+
727	NNU_21751-RA	0.66	*	-	NNU_21751	3.43879	0	+
745	NNU_24598-RA	1.62	*	+	NNU_24598	-7.07655	1.29113e-07	-
748	NNU_13190-RA	1.26	*	+	NNU_13190	-5.50671	5.77121e-236	-
772	NNU_20644-RA	1.65	*	+	NNU_20644	-1.66954	1.80879e-122	-
778	NNU_06462-RA	1.21	*	+	NNU_06462	-2.15697	0	-
794	NNU_05367-RA	0.76	*	-	NNU_05367	2.54761	8.54655e-13	+
806	NNU_08730-RA	1.24	*	+	NNU_08730	-1.55776	1.66394e-100	-
844	NNU_15167-RA	0.74	*	-	NNU_15167	1.20065	2.47632e-86	+
846	NNU_22992-RA	1.24	*	+	NNU_22992	-1.91849	1.23228e-204	-
855	NNU_09803-RA	1.22	*	+	NNU_09803	-5.05379	1.12249e-232	-
856	NNU_04600-RA	1.32	*	+	NNU_04600	-1.56157	0	-
874	NNU_00816-RA	1.22	*	+	NNU_00816	-2.17832	0	-
912	NNU_01572-RA	0.82	*	-	NNU_01572	1.22179	1.02316e-99	+
935	NNU_12073-RA	1.37	*	+	NNU_12073	-1.68789	0.0076462	-
1017	NNU_02151-RA	0.81	*	-	NNU_02151	3.11911	1.02912e-107	+
1127	NNU_14620-RA	1.5	*	+	NNU_14620	-1.85026	4.38362e-25	-
1134	NNU_20298-RA	0.73	*	-	NNU_20298	5.71952	3.01809e-147	+
1161	NNU_22006-RA	0.79	*	-	NNU_22006	2.44665	0	+
1166	NNU_03245-RA	0.73	*	-	NNU_03245	1.34949	2.98238e-05	+
1197	NNU_08044-RA	0.81	*	-	NNU_08044	1.01107	0.000292831	+
1225	NNU_02898-RA	1.25	*	+	NNU_02898	-1.53347	0	-
1245	NNU_12173-RA	1.42	*	+	NNU_12173	-1.90713	0	-
1271	NNU_18226-RA	0.83	*	-	NNU_18226	7.23608	0	+
1284	NNU_25886-RA	0.7	*	-	NNU_25886	1.4746	2.56545e-17	+
1305	NNU_06254-RA	0.76	*	-	NNU_06254	1.55713	3.18429e-16	+
1329	NNU_04784-RA	0.78	*	-	NNU_04784	4.05634	3.21645e-56	+
1334	NNU_04212-RA	0.81	*	-	NNU_04212	2.89269	0	+
1383	NNU_20895-RA	0.83	*	-	NNU_20895	1.84155	7.21341e-89	+
1394	NNU_15645-RA	1.23	*	+	NNU_15645	-1.18098	0.0144289	-
1418	NNU_14523-RA	0.7	*	-	NNU_14523	4.61067	0	+
1444	NNU_01188-RA	0.73	*	-	NNU_01188	5.33379	0	+
1452	NNU_20326-RA	1.22	*	+	NNU_20326	-2.19493	0	-
1464	NNU_06824-RA	1.49	*	+	NNU_06824	-1.68501	8.51162e-227	-
1492	NNU_09448-RA	0.81	*	-	NNU_09448	1.16101	0.0099051	+
1518	NNU_01542-RA	1.29	*	+	NNU_01542	-2.62931	0.0442206	-
1545	NNU_20450-RA	1.47	*	+	NNU_20450	-2.16692	0	-
1569	NNU_04184-RA	1.47	*	+	NNU_04184	-2.09023	2.96394e-304	-
1596	NNU_17448-RA	1.56	*	+	NNU_17448	-2.35633	2.28703e-234	-
1716	NNU_19570-RA	0.74	*	-	NNU_19570	2.20667	1.06872e-21	+
1735	NNU_13024-RA	0.78	*	-	NNU_13024	1.06396	2.5627e-131	+
1763	NNU_09112-RA	1.23	*	+	NNU_09112	-1.61538	9.95548e-94	-
1768	NNU_07247-RA	0.74	*	-	NNU_07247	1.59794	9.25884e-31	+
1794	NNU_19448-RA	0.8	*	-	NNU_19448	1.94586	1.29224e-101	+
1860	NNU_16854-RA	0.63	*	-	NNU_16854	2.24191	1.19522e-228	+
1874	NNU_25382-RA	0.72	*	-	NNU_25382	3.83185	7.80708e-172	+
1913	NNU_01622-RA	0.83	*	-	NNU_01622	1.17672	2.61685e-38	+
2089	NNU_11879-RA	1.38	*	+	NNU_11879	-1.47828	2.01643e-44	-
2159	NNU_05205-RA	1.37	*	+	NNU_05205	-1.36506	8.9975e-20	-
2192	NNU_02215-RA	0.65	*	-	NNU_02215	4.17055	0	+
2199	NNU_01334-RA	1.25	*	+	NNU_01334	-1.29058	0	-
2215	NNU_13090-RA	0.78	*	-	NNU_13090	1.33382	5.12338e-34	+
2225	NNU_20422-RA	0.73	*	-	NNU_20422	7.30381	3.42418e-226	+
2276	NNU_24784-RA	1.37	*	+	NNU_24784	-2.21471	6.43103e-10	-
2290	NNU_15361-RA	3.32	*	+	NNU_15361	-1.74461	0	-
2298	NNU_08198-RA	1.22	*	+	NNU_08198	-2.36961	0	-
2341	NNU_03529-RA	0.77	*	-	NNU_03529	1.29244	1.44136e-58	+
2418	NNU_18831-RA	0.58	*	-	NNU_18831	5.15356	0	+
2420	NNU_09773-RA	1.26	*	+	NNU_09773	-1.37092	0	-
2503	NNU_16670-RA	0.81	*	-	NNU_16670	2.34015	5.56545e-238	+
2529	NNU_16927-RA	1.26	*	+	NNU_16927	-3.21518	0	-
2536	NNU_26267-RA	1.46	*	+	NNU_26267	-1.91917	0	-
2579	NNU_03338-RA	0.71	*	-	NNU_03338	1.34623	6.15867e-62	+
2589	NNU_21838-RA	0.58	*	-	NNU_21838	3.93338	2.26211e-177	+
2653	NNU_26169-RA	1.29	*	+	NNU_26169	-2.09096	0	-
2654	NNU_05398-RA	0.78	*	-	NNU_05398	2.17859	0.00344205	+
2669	NNU_04233-RA	1.33	*	+	NNU_04233	-2.19773	0	-
2673	NNU_00950-RA	0.75	*	-	NNU_00950	1.15137	3.93335e-91	+
2686	NNU_14921-RA	0.8	*	-	NNU_14921	2.3299	0	+
2702	NNU_26383-RA	0.79	*	-	NNU_26383	1.60925	2.80542e-75	+
2756	NNU_26463-RA	0.5	*	-	NNU_26463	9.76554	1.77978e-84	+
2872	NNU_10434-RA	1.24	*	+	NNU_10434	-1.69569	0	-
2885	NNU_26444-RA	0.79	*	-	NNU_26444	1.30211	5.27058e-23	+
2895	NNU_05908-RA	0.83	*	-	NNU_05908	1.19478	1.59919e-33	+
2935	NNU_14548-RA	0.78	*	-	NNU_14548	2.81155	3.21528e-06	+
2946	NNU_06891-RA	0.75	*	-	NNU_06891	3.31909	7.96986e-208	+
2978	NNU_08884-RA	0.8	*	-	NNU_08884	7.48277	6.83433e-86	+
2985	NNU_23814-RA	0.83	*	-	NNU_23814	5.64622	3.45736e-10	+
3042	NNU_22871-RA	0.81	*	-	NNU_22871	1.09729	7.12903e-213	+
3128	NNU_03672-RA	0.83	*	-	NNU_03672	1.78619	2.28316e-171	+
3129	NNU_15031-RA	1.67	*	+	NNU_15031	-3.33054	0	-
3137	NNU_16773-RA	1.59	*	+	NNU_16773	-1.43773	3.16103e-285	-
3197	NNU_06487-RA	1.26	*	+	NNU_06487	-2.82815	0	-
3260	NNU_24843-RA	1.31	*	+	NNU_24843	-2.23425	3.38111e-260	-
3267	NNU_25964-RA	0.7	*	-	NNU_25964	2.43545	0	+
3292	NNU_13012-RA	1.33	*	+	NNU_13012	-1.30213	1.29452e-244	-
3332	NNU_19650-RA	1.22	*	+	NNU_19650	-2.54398	0	-
3377	NNU_14084-RA	0.75	*	-	NNU_14084	8.19377	3.74828e-112	+
3409	NNU_07340-RA	1.21	*	+	NNU_07340	-2.35095	3.37252e-149	-
3456	NNU_10798-RA	1.27	*	+	NNU_10798	-2.2884	0	-
3458	NNU_25178-RA	0.63	*	-	NNU_25178	2.33053	1.34203e-211	+
3462	NNU_02393-RA	0.82	*	-	NNU_02393	2.9533	0	+
3470	NNU_15862-RA	1.61	*	+	NNU_15862	-1.99312	0	-
3476	NNU_01032-RA	0.83	*	-	NNU_01032	2.68524	1.45133e-08	+
3492	NNU_22334-RA	0.63	*	-	NNU_22334	1.82341	0	+
3521	NNU_11787-RA	0.75	*	-	NNU_11787	3.85324	2.35835e-152	+
3536	NNU_20257-RA	1.45	*	+	NNU_20257	-2.25064	0	-
3551	NNU_17453-RA	1.29	*	+	NNU_17453	-2.96374	1.0406e-60	-
3640	NNU_16961-RA	0.8	*	-	NNU_16961	2.63037	0	+
3724	NNU_09801-RA	1.21	*	+	NNU_09801	-1.20192	8.85117e-231	-
3751	NNU_04903-RA	1.28	*	+	NNU_04903	-1.4566	9.06535e-273	-
3782	NNU_19893-RA	0.82	*	-	NNU_19893	2.10994	7.13473e-180	+
3799	NNU_23610-RA	0.81	*	-	NNU_23610	1.13871	1.21487e-14	+
3804	NNU_19662-RA	1.36	*	+	NNU_19662	-1.00362	6.8392e-59	-
3833	NNU_11306-RA	0.69	*	-	NNU_11306	5.21674	0	+
3910	NNU_25903-RA	1.37	*	+	NNU_25903	-1.16548	0	-
3971	NNU_26610-RA	1.87	*	+	NNU_26610	-1.32305	1.60219e-108	-
3992	NNU_08593-RA	0.76	*	-	NNU_08593	1.08009	2.0238e-69	+
3997	NNU_18252-RA	0.81	*	-	NNU_18252	1.80972	3.09097e-177	+
3999	NNU_09103-RA	0.74	*	-	NNU_09103	1.80178	0.0167618	+
4000	NNU_03550-RA	0.8	*	-	NNU_03550	2.58721	3.31682e-270	+
4002	NNU_12294-RA	1.33	*	+	NNU_12294	-1.11255	0	-
4029	NNU_16434-RA	0.75	*	-	NNU_16434	3.90245	0.0212774	+
4067	NNU_03165-RA	0.69	*	-	NNU_03165	6.40964	3.15075e-37	+
4073	NNU_18188-RA	1.32	*	+	NNU_18188	-1.5446	0	-
4076	NNU_23854-RA	0.75	*	-	NNU_23854	3.54064	0	+
4081	NNU_07823-RA	1.28	*	+	NNU_07823	-1.74267	0	-
4103	NNU_06036-RA	0.82	*	-	NNU_06036	2.43022	4.15378e-36	+
4115	NNU_09848-RA	0.8	*	-	NNU_09848	9.61685	2.8814e-16	+
4133	NNU_20896-RA	1.34	*	+	NNU_20896	-1.58414	5.20154e-190	-
4161	NNU_06454-RA	1.64	*	+	NNU_06454	-5.02179	0	-
4277	NNU_15575-RA	0.82	*	-	NNU_15575	6.58911	2.73498e-31	+
4281	NNU_23168-RA	0.83	*	-	NNU_23168	6.12926	3.40317e-250	+
4335	NNU_18312-RA	0.73	*	-	NNU_18312	1.48968	5.6161e-59	+
4421	NNU_11137-RA	0.75	*	-	NNU_11137	1.17277	1.15904e-42	+
4442	NNU_26127-RA	0.82	*	-	NNU_26127	1.16691	1.37091e-76	+
4494	NNU_01692-RA	0.78	*	-	NNU_01692	4.09052	4.24942e-155	+
4546	NNU_17419-RA	1.3	*	+	NNU_17419	-2.35739	2.33913e-47	-
4623	NNU_04002-RA	0.81	*	-	NNU_04002	5.57467	1.08248e-45	+
4646	NNU_11979-RA	0.77	*	-	NNU_11979	2.60911	2.56069e-82	+
4695	NNU_21321-RA	1.3	*	+	NNU_21321	-1.26757	2.9821e-176	-
4706	NNU_20785-RA	1.35	*	+	NNU_20785	-1.14333	7.75713e-100	-
4722	NNU_25347-RA	0.8	*	-	NNU_25347	2.13382	1.52137e-156	+
4783	NNU_06751-RA	0.83	*	-	NNU_06751	1.16299	3.37927e-21	+
4785	NNU_02183-RA	0.81	*	-	NNU_02183	1.20018	2.12073e-38	+
4789	NNU_07386-RA	1.36	*	+	NNU_07386	-1.36723	0	-
4790	NNU_08609-RA	1.34	*	+	NNU_08609	-2.17844	0	-
4812	NNU_16406-RA	0.81	*	-	NNU_16406	6.70084	0	+
4833	NNU_05007-RA	1.8	*	+	NNU_05007	-2.57952	0	-
4867	NNU_21309-RA	0.78	*	-	NNU_21309	2.109	5.7426e-37	+
4870	NNU_02750-RA	0.83	*	-	NNU_02750	2.25331	1.08449e-24	+
4885	NNU_12047-RA	1.42	*	+	NNU_12047	-1.75527	2.38329e-12	-
4893	NNU_02724-RA	0.81	*	-	NNU_02724	1.11062	1.5383e-110	+
4919	NNU_11130-RA	1.31	*	+	NNU_11130	-2.17593	0	-
4934	NNU_11141-RA	0.46	*	-	NNU_11141	3.30476	5.64089e-181	+
4941	NNU_09006-RA	0.76	*	-	NNU_09006	1.14375	3.83356e-15	+
4945	NNU_12092-RA	0.83	*	-	NNU_12092	2.19915	4.52122e-78	+
4951	NNU_16203-RA	0.79	*	-	NNU_16203	1.97729	1.70348e-58	+
4977	NNU_22182-RA	0.74	*	-	NNU_22182	8.8443	7.5861e-61	+
5088	NNU_21372-RA	0.55	*	-	NNU_21372	2.64792	2.57445e-146	+
5107	NNU_23013-RA	1.23	*	+	NNU_23013	-1.64558	2.96987e-159	-
5109	NNU_19710-RA	1.22	*	+	NNU_19710	-1.82799	3.02019e-255	-
5242	NNU_17961-RA	0.79	*	-	NNU_17961	1.62646	1.0565e-40	+
5268	NNU_07057-RA	0.7	*	-	NNU_07057	7.13289	1.64396e-62	+
5283	NNU_20259-RA	0.76	*	-	NNU_20259	7.20038	0	+
5342	NNU_23243-RA	0.75	*	-	NNU_23243	2.20225	3.49675e-108	+
5349	NNU_13395-RA	1.25	*	+	NNU_13395	-1.25138	6.13577e-177	-
5385	NNU_24378-RA	1.28	*	+	NNU_24378	-1.90069	0	-
5409	NNU_12882-RA	0.79	*	-	NNU_12882	2.61747	2.39464e-61	+
5440	NNU_09849-RA	0.76	*	-	NNU_09849	4.78767	1.02555e-151	+
5456	NNU_21019-RA	1.26	*	+	NNU_21019	-1.88277	0	-
5478	NNU_23196-RA	2.45	*	+	NNU_23196	-3.5273	4.42973e-43	-
5502	NNU_17482-RA	0.62	*	-	NNU_17482	1.30823	1.06173e-56	+
5596	NNU_23917-RA	1.43	*	+	NNU_23917	-1.46777	0	-
5622	NNU_18337-RA	0.83	*	-	NNU_18337	1.28845	7.62914e-34	+
5650	NNU_05933-RA	1.23	*	+	NNU_05933	-2.59871	0	-
5676	NNU_07381-RA	1.24	*	+	NNU_07381	-1.52763	1.40248e-174	-
5688	NNU_07472-RA	1.21	*	+	NNU_07472	-1.15891	3.17159e-24	-
5777	NNU_11159-RA	0.69	*	-	NNU_11159	3.93337	0	+
5809	NNU_24409-RA	0.8	*	-	NNU_24409	8.40506	0	+
5883	NNU_00676-RA	0.62	*	-	NNU_00676	1.0047	1.24263e-25	+
5930	NNU_07068-RA	0.74	*	-	NNU_07068	6.38379	2.93486e-113	+
5939	NNU_08711-RA	1.68	*	+	NNU_08711	-2.60934	0	-
6005	NNU_00860-RA	1.22	*	+	NNU_00860	-1.61967	3.25904e-259	-
6020	NNU_15801-RA	0.57	*	-	NNU_15801	1.09929	2.63063e-124	+
6024	NNU_15978-RA	1.91	*	+	NNU_15978	-2.21449	0	-
6031	NNU_13438-RA	0.8	*	-	NNU_13438	1.75118	1.55023e-266	+
6046	NNU_14382-RA	0.61	*	-	NNU_14382	1.20069	0.0379583	+
6154	NNU_12277-RA	1.21	*	+	NNU_12277	-1.7432	0	-
6163	NNU_05043-RA	1.29	*	+	NNU_05043	-1.70467	0	-
6171	NNU_18846-RA	0.83	*	-	NNU_18846	5.79528	0	+
6276	NNU_02335-RA	1.23	*	+	NNU_02335	-1.3273	1.01856e-107	-
6312	NNU_06449-RA	1.68	*	+	NNU_06449	-2.96345	0	-
6351	NNU_24553-RA	1.37	*	+	NNU_24553	-3.39913	0	-
6377	NNU_07711-RA	0.82	*	-	NNU_07711	1.19584	3.04479e-53	+
6379	NNU_10789-RA	0.8	*	-	NNU_10789	2.78871	1.09638e-223	+
6416	NNU_03166-RA	0.61	*	-	NNU_03166	6.33153	3.96279e-36	+
6467	NNU_00332-RA	0.82	*	-	NNU_00332	1.20753	3.16432e-75	+
6519	NNU_08029-RA	0.56	*	-	NNU_08029	1.49722	9.73585e-52	+
6527	NNU_05663-RA	1.37	*	+	NNU_05663	-1.67076	0	-
6575	NNU_04373-RA	1.25	*	+	NNU_04373	-1.25176	6.37048e-281	-
6583	NNU_15764-RA	0.74	*	-	NNU_15764	3.02999	9.19686e-25	+
6594	NNU_10082-RA	0.69	*	-	NNU_10082	1.43669	1.33231e-61	+
6597	NNU_07007-RA	1.25	*	+	NNU_07007	-1.32879	5.93047e-158	-
6615	NNU_21154-RA	0.64	*	-	NNU_21154	6.50961	1.43268e-231	+
6621	NNU_22005-RA	0.73	*	-	NNU_22005	6.67791	5.64453e-163	+
6644	NNU_22480-RA	0.66	*	-	NNU_22480	1.32337	2.90213e-227	+
6680	NNU_26458-RA	0.83	*	-	NNU_26458	1.22211	8.40294e-65	+
6722	NNU_01172-RA	0.83	*	-	NNU_01172	7.26075	0	+
6818	NNU_15982-RA	1.21	*	+	NNU_15982	-1.83205	5.05459e-57	-

## Sheet: Table S5
Table S5. KEGG enrichment correlation of transcriptome and proteome
Pathway_ID	Pathway_Name	Protein P-value	Gene P-value	-LOG10(Protein P value)	-LOG10(Gene P value)
ko01110	Biosynthesis of secondary metabolites	2.24e-08	0.00568	7.64931	2.24565
ko00940	Phenylpropanoid biosynthesis	1.45e-07	1.4e-05	6.84005	4.85387
ko01100	Metabolic pathways	2.38e-07	0.0359	6.62382	1.44491
ko00945	Stilbenoid, diarylheptanoid and gingerol biosynthesis	7.58e-05	0.00401	4.12017	2.39686
ko00500	Starch and sucrose metabolism	0.000765467	0.231	3.11607	0.636388
ko00910	Nitrogen metabolism	0.000924825	0.899	3.03394	0.0462403
ko00901	Indole alkaloid biosynthesis	0.000940834	0.163	3.02649	0.787812
ko00040	Pentose and glucuronate interconversions	0.00246852	0.163	2.60756	0.787812
ko00360	Phenylalanine metabolism	0.00353308	0.135	2.45185	0.869666
ko00941	Flavonoid biosynthesis	0.00518443	0.00501	2.2853	2.30016
ko00460	Cyanoamino acid metabolism	0.00762464	0.703	2.11778	0.153045
ko04626	Plant-pathogen interaction	0.00879277	0.00064	2.05587	3.19382
ko00520	Amino sugar and nucleotide sugar metabolism	0.00923116	2.37e-05	2.03474	4.62525
ko04016	MAPK signaling pathway - plant	0.0133798	0.000328	1.87355	3.48413
ko00630	Glyoxylate and dicarboxylate metabolism	0.0143041	1	1.84454	0
ko00240	Pyrimidine metabolism	0.0156518	0.561	1.80544	0.251037
ko00943	Isoflavonoid biosynthesis	0.0257415	0.00568	1.58937	2.24565
ko00250	Alanine, aspartate and glutamate metabolism	0.028471	1	1.5456	0
ko00562	Inositol phosphate metabolism	0.0296252	0.669	1.52834	0.174574
ko03020	RNA polymerase	0.0312383	0.147	1.50531	0.832683
ko00052	Galactose metabolism	0.0337754	2.37e-05	1.4714	4.62525
ko00710	Carbon fixation in photosynthetic organisms	0.05226	1	1.28183	0
ko04712	Circadian rhythm - plant	0.0655031	0.0701	1.18374	1.15428
ko00130	Ubiquinone and other terpenoid-quinone biosynthesis	0.0768675	0.626	1.11426	0.203426
ko00350	Tyrosine metabolism	0.0782234	0.79	1.10666	0.102373
ko00062	Fatty acid elongation	0.103173	1	0.986434	0
ko00300	Lysine biosynthesis	0.10323	0.626	0.986194	0.203426
ko00620	Pyruvate metabolism	0.11685	1	0.932372	0
ko00270	Cysteine and methionine metabolism	0.119152	0.709	0.923898	0.149354
ko00010	Glycolysis / Gluconeogenesis	0.125775	1	0.900406	0
ko00592	alpha-Linolenic acid metabolism	0.137174	0.072	0.862729	1.14267
ko00232	Caffeine metabolism	0.143254	0.703	0.843893	0.153045
ko00230	Purine metabolism	0.144519	1	0.840074	0
ko00072	Synthesis and degradation of ketone bodies	0.15243	1	0.81693	0
ko04075	Plant hormone signal transduction	0.159094	8.92e-09	0.798345	8.04964
ko00073	Cutin, suberine and wax biosynthesis	0.162443	3.29e-06	0.7893	5.4828
ko00220	Arginine biosynthesis	0.164181	0.669	0.784676	0.174574
ko01040	Biosynthesis of unsaturated fatty acids	0.172023	0.256	0.764413	0.59176
ko00740	Riboflavin metabolism	0.200853	0.669	0.697121	0.174574
ko01230	Biosynthesis of amino acids	0.214672	1	0.668225	0
ko01212	Fatty acid metabolism	0.23345	0.983	0.631806	0.00744648
ko00760	Nicotinate and nicotinamide metabolism	0.251293	0.163	0.599819	0.787812
ko01210	2-Oxocarboxylic acid metabolism	0.256467	1	0.590968	0
ko02010	ABC transporters	0.273512	0.325	0.563023	0.488117
ko00860	Porphyrin and chlorophyll metabolism	0.278664	0.669	0.554919	0.174574
ko00604	Glycosphingolipid biosynthesis - ganglio series	0.28246	0.448	0.549043	0.348722
ko00071	Fatty acid degradation	0.297422	0.566	0.526627	0.247184
ko01200	Carbon metabolism	0.307216	1	0.512556	0
ko03010	Ribosome	0.309128	1	0.509862	0
ko00564	Glycerophospholipid metabolism	0.323897	1	0.489593	0
ko00400	Phenylalanine, tyrosine and tryptophan biosynthesis	0.334884	1	0.475106	0
ko00600	Sphingolipid metabolism	0.342756	0.668	0.465015	0.175224
ko04070	Phosphatidylinositol signaling system	0.3464	0.0701	0.460422	1.15428
ko00514	Other types of O-glycan biosynthesis	0.366252	0.42	0.43622	0.376751
ko00531	Glycosaminoglycan degradation	0.366252	0.626	0.43622	0.203426
ko00905	Brassinosteroid biosynthesis	0.371192	0.147	0.430402	0.832683
ko00903	Limonene and pinene degradation	0.377095	0.147	0.423549	0.832683
ko00051	Fructose and mannose metabolism	0.381456	0.0508	0.418555	1.29414
ko00650	Butanoate metabolism	0.388987	1	0.410065	0
ko00030	Pentose phosphate pathway	0.410437	0.709	0.386754	0.149354
ko00944	Flavone and flavonol biosynthesis	0.430758	0.172	0.365767	0.764472
ko00480	Glutathione metabolism	0.432135	0.563	0.36438	0.249492
ko00906	Carotenoid biosynthesis	0.448231	1	0.348498	0
ko00511	Other glycan degradation	0.457356	0.135	0.339746	0.869666
ko00430	Taurine and hypotaurine metabolism	0.461318	0.669	0.336	0.174574
ko03450	Non-homologous end-joining	0.461318	1	0.336	0
ko00330	Arginine and proline metabolism	0.467398	0.582	0.330313	0.235077
ko00380	Tryptophan metabolism	0.522938	1	0.28155	0
ko00450	Selenocompound metabolism	0.525585	0.899	0.279357	0.0462403
ko00909	Sesquiterpenoid and triterpenoid biosynthesis	0.53854	0.448	0.268782	0.348722
ko04144	Endocytosis	0.543076	0.448	0.26514	0.348722
ko00565	Ether lipid metabolism	0.561941	1	0.250309	0
ko00053	Ascorbate and aldarate metabolism	0.565612	0.0359	0.247481	1.44491
ko04146	Peroxisome	0.572375	0.448	0.24232	0.348722
ko00790	Folate biosynthesis	0.575008	0.563	0.240326	0.249492
ko00261	Monobactam biosynthesis	0.575008	0.832	0.240326	0.0798767
ko03060	Protein export	0.576273	1	0.239372	0
ko04141	Protein processing in endoplasmic reticulum	0.576796	1	0.238978	0
ko00590	Arachidonic acid metabolism	0.596551	1	0.224352	0
ko00942	Anthocyanin biosynthesis	0.604703	0.176	0.218458	0.754487
ko00440	Phosphonate and phosphinate metabolism	0.604703	1	0.218458	0
ko00730	Thiamine metabolism	0.616782	0.754	0.209868	0.122629
ko00561	Glycerolipid metabolism	0.61773	0.0146	0.209202	1.83565
ko00020	Citrate cycle (TCA cycle)	0.61773	1	0.209202	0
ko00640	Propanoate metabolism	0.627839	1	0.202152	0
ko00061	Fatty acid biosynthesis	0.640541	0.163	0.193453	0.787812
ko03410	Base excision repair	0.655325	0.231	0.183543	0.636388
ko00100	Steroid biosynthesis	0.66021	0.00886	0.180318	2.05257
ko03018	RNA degradation	0.662883	1	0.178563	0
ko00410	beta-Alanine metabolism	0.667515	0.832	0.175539	0.0798767
ko00900	Terpenoid backbone biosynthesis	0.716152	0.553	0.144994	0.257275
ko00780	Biotin metabolism	0.723034	0.42	0.140841	0.376751
ko00660	C5-Branched dibasic acid metabolism	0.751564	1	0.124034	0
ko00563	Glycosylphosphatidylinositol (GPI)-anchor biosynthesis	0.751564	0.832	0.124034	0.0798767
ko00195	Photosynthesis	0.751564	0.669	0.124034	0.174574
ko00920	Sulfur metabolism	0.779152	0.899	0.108378	0.0462403
ko04120	Ubiquitin mediated proteolysis	0.779973	0.42	0.107921	0.376751
ko03008	Ribosome biogenesis in eukaryotes	0.797445	1	0.0982994	0
ko00750	Vitamin B6 metabolism	0.817746	0.256	0.0873818	0.59176
ko00950	Isoquinoline alkaloid biosynthesis	0.825048	1	0.0835207	0
ko00290	Valine, leucine and isoleucine biosynthesis	0.825048	1	0.0835207	0
ko00190	Oxidative phosphorylation	0.828726	1	0.0815888	0
ko00603	Glycosphingolipid biosynthesis - globo and isoglobo series	0.866312	0.448	0.0623256	0.348722
ko00280	Valine, leucine and isoleucine degradation	0.871182	0.983	0.059891	0.00744648
ko00960	Tropane, piperidine and pyridine alkaloid biosynthesis	0.87791	0.863	0.0565499	0.0639892
ko00310	Lysine degradation	0.891966	1	0.0496518	0
ko03050	Proteasome	0.919857	1	0.0362797	0
ko04145	Phagosome	0.933047	1	0.0300964	0
ko00670	One carbon pool by folate	0.954852	0.917	0.020064	0.0376307
ko03430	Mismatch repair	0.97166	0.563	0.0124856	0.249492
ko00770	Pantothenate and CoA biosynthesis	0.97166	1	0.0124856	0
ko03022	Basal transcription factors	0.979227	1	0.0091168	0
ko00510	N-Glycan biosynthesis	0.982175	1	0.00781121	0
ko03015	mRNA surveillance pathway	0.985679	1	0.00626467	0
ko00970	Aminoacyl-tRNA biosynthesis	0.986569	1	0.00587232	0
ko03013	RNA transport	0.988576	1	0.00498989	0
ko00260	Glycine, serine and threonine metabolism	0.992016	0.801	0.00348154	0.0963675
ko03040	Spliceosome	0.999903	1	4.22589e-05	0

## Sheet: Fig. S1
	Fig. S1
	Fig. S1. SDS-PAGE of samples used for proteome analyses. The proteins quality of rhizomes from FP (FP1, FP2 and FP3) and CP (CP1, CP2 and CP3) was assessed by 12 % SDS-PAGE, using leaf proteins as control (L1 and L2)
